# Supplementary material for: Tracking the CAR-T Revolution: Analysis of Clinical Trials of CAR-T and TCR Therapies for the Treatment of Cancer (1997-2020)
Source: Preprints.org preprint supplement (doi:10.20944/preprints202107.0198.v1), 2021-07-08
Supplement: Supplementary file 1 [file supplementary]

## Sheet: Data
ClinicalTrials.gov Identifier	Disease Tissue	Antigen or Other Discriminator	phase	enrollment status	Start Date	Primary Completion Date	Completion Date	BLA/NDA Acceptance Date	Approval Date	Company	Originator Country	Drug Name
NCT00019136	Ovarian Cancer	FBP	Phase 1	Completed	Feb-1997	Oct-2007	Oct-2007	0	0	National Cancer Institute (NCI)	United States	Gene Therapy and Biological Therapy in Treating Patients With Ovarian Epithelial Cancer
NCT00004178	Cancer, unspecified	Unknown	Phase 1	Completed	Apr-1998	Dec-2000	Dec-2001	0	0	Roger Williams Medical Center	United States	Gene Therapy in Treating Patients With Cancer
NCT00012207	B-Cell Lymphoma	CD20	Phase 1	Completed	Sep-2000	Jul-2010	Jul-2010	0	0	Fred Hutchinson Cancer Research Center|National Cancer Institute (NCI)	United States	Biological Therapy After Chemotherapy in Treating Patients With Relapsed or Refractory Non-Hodgkin's Lymphoma
NCT00037817	Lung	NY-ESO-1	Phase 1	Completed	May-2002	Oct-2008	Nov-2009	0	0	Gilead|Kite Pharma	United States	NY-ESO-1 T cell therapy
NCT00052520	ALL|AML|CML|MDS	WT-1	Phase 1Phase 2	Completed	Sep-2002	Apr-2011	Jun-2013	0	0	Fred Hutchinson Cancer Research Center|National Cancer Institute (NCI)	United States	Biological Therapy in Treating Patients With Advanced Myelodysplastic Syndrome, Acute or Chronic Myeloid Leukemia, or Acute Lymphoblastic Leukemia Who Are Undergoing Stem Cell Transplantation
NCT00085930	Neuroblastoma	GD2	Phase 1	Active, not recruiting	Apr-2003	Jan-2010	Dec-2021	0	0	Baylor College of Medicine|Texas Children's Hospital|Center for Cell and Gene Therapy, Baylor College of Medicine	United States	Blood T-Cells and EBV Specific CTLs Expressing GD-2 Specific Chimeric T Cell Receptors to Neuroblastoma Patients
NCT00085462	Melanoma	CD8	Phase 1	Completed	May-2004	May-2007	Sep-2008	0	0	National Institutes of Health Clinical Center (CC)|National Cancer Institute (NCI)	United States	Gene-Modified White Blood Cells Followed By Interleukin-2 and Vaccine Therapy in Treating Patients With Metastatic Melanoma
NCT00090493	Multiple Myeloma	MAGE-A3 NY-ESO-1	Phase 2Phase 3	Completed	Jun-2004	Jul-2007	May-2012	0	0	University of Arkansas	United States	Study of MAGE-A3 and NY-ESO-1 Immunotherapy in Combo With DTPACE Chemo and Auto Transplantation in Multiple Myeloma
NCT00182650	B-Cell Lymphoma	CD19	Phase 1	Completed	Jun-2004	Mar-2008	Mar-2008	0	0	City of Hope Medical Center|National Cancer Institute (NCI)	United States	Cellular Adoptive Immunotherapy in Treating Patients With Relapsed or Refractory Follicular Non-Hodgkin's Lymphoma
NCT00324623	Melanoma	MART-1	Phase 1	Completed	Sep-2005	Nov-2011	Nov-2011	0	0	Centre Hospitalier Universitaire Vaudois	Switzerland	Cyclophosphamide and Fludarabine Followed by Cellular Adoptive Immunotherapy and Vaccine Therapy in Patients With Metastatic Melanoma
NCT01929239	Prostate	PSMA	Phase 1Phase 2	Suspended	Mar-2006	Dec-2017	Dec-2018	0	0	Roger Williams Medical Center	United States	Trial of Anti-PSMA Designer T Cells in Advanced Prostate Cancer After Non-Myeloablative Conditioning
NCT00393029	Solid Tumors	p53	Phase 2	Completed	Oct-2006	Nov-2008	Nov-2008	0	0	National Cancer Institute (NCI)|National Institutes of Health Clinical Center (CC)	United States	Phase II Study of Metastatic Cancer That Overexpresses P53 Using Lymphodepleting Conditioning Followed by Infusion of Anti-P53 TCR-Gene Engineered Lymphocytes
NCT00466531	CLL|B-Cell Lymphoma	CD19	Phase 1Phase 2	Active, not recruiting	Mar-2007	Dec-2021	Dec-2021	0	0	Memorial Sloan Kettering Cancer Center|National Cancer Institute (NCI)	United States	Treatment of Relapsed or Chemotherapy Refractory Chronic Lymphocytic Leukemia or Indolent B Cell Lymphoma Using Autologous T Cells Genetically Targeted to the B Cell Specific Antigen CD19
NCT00509288	Melanoma	MART-1	Phase 2	Completed	Jun-2007	Jul-2011	Jul-2012	0	0	National Cancer Institute	United States	Phase II Study of Metastatic Melanoma With Lymphodepleting Conditioning and Infusion of Anti-MART-1 F5 TCR-Gene-Engineered Lymphocytes
NCT00509496	Melanoma	gp100	Phase 2	Terminated	Jun-2007	Jul-2011	Jul-2012	0	0	National Cancer Institute	United States	Phase II Study of Metastatic Melanoma With Lymphodepleting Conditioning and Anti-gp100:154-162 TCR Gene Engineered Lymphocytes
NCT00429078	Gastric	CEA	Phase 1	Withdrawn	Jul-2007	Apr-2011	Apr-2011	0	0	Roger Williams Medical Center	United States	Trial of 2nd Generation Anti-CEA Designer T Cells in Gastric Cancer
NCT00621452	B-Cell Lymphoma	CD20	Phase 1	Completed	Aug-2007	Jan-2014	Jan-2014	0	0	Fred Hutchinson Cancer Research Center|National Cancer Institute (NCI)	United States	Genetically Engineered Lymphocytes, Cyclophosphamide, and Aldesleukin in Treating Patients With Relapsed or Refractory Mantle Cell Lymphoma or Indolent B-Cell Non-Hodgkin Lymphoma
NCT00562640	Fallopian Tube	WT-1	Phase 1	Active, not recruiting	Oct-2007	Dec-2021	Dec-2021	0	0	Memorial Sloan Kettering Cancer Center|National Cancer Institute (NCI)	United States	Autologous T Cells With or Without Cyclophosphamide and Fludarabine in Treating Patients With Recurrent or Persistent Advanced Ovarian Epithelial Cancer, Primary Peritoneal Cavity Cancer, or Fallopian Tube Cancer (Fludarabine Treatment Closed as of 12/01/2009)
NCT00620633	Leukaemia|MDS	WT-1	Phase 1	Active, not recruiting	Feb-2008	Feb-2022	Feb-2022	0	0	Memorial Sloan Kettering Cancer Center|Atara Biotherapeutics	United States	Dose Escalation Trial of WT1-Sensitized T Cells for Residual or Relapsed Leukemia After Allogeneic Hematopoietic Progenitor Cell Transplantation
NCT01493453	B-Cell Lymphoma	CD19	Phase 1	Unknown	Mar-2008	May-2014	Dec-2014	0	0	Professor Robert Hawkins|The Christie NHS Foundation Trust	United Kingdom	A Phase I Study of CD19 Specific T Cells in CD19 Positive Malignancy
NCT00664196	Prostate	PSMA	Phase 1	Suspended	Apr-2008	Dec-2017	Dec-2018	0	0	Roger Williams Medical Center	United States	Trial of Anti-PSMA Designer T Cells in Advanced Prostate Cancer After Non-Myeloablative Conditioning
NCT00670748	Melanoma	NY-ESO-1	Phase 2	Terminated	May-2008	Jun-2016	Jun-2016	0	0	Gilead|Kite Pharma	United States	NY-ESO-1 T cell therapy
NCT00673322	Colorectal	CEA	Phase 1	Terminated	May-2008	Aug-2012	Aug-2012	0	0	Roger Williams Medical Center	United States	Trial of Second Generation Designer T Cells in Colorectal Carcinoma
NCT00673829	Breast	CEA	Phase 1	Suspended	May-2008	Dec-2017	Dec-2018	0	0	Roger Williams Medical Center	United States	Trial of 2nd Generation Anti-CEA Designer T Cells in Metastatic Breast Cancer
NCT00704938	Kidney|Melanoma	p53	Phase 2	Terminated	Jun-2008	Aug-2009	Aug-2009	0	0	National Institutes of Health Clinical Center (CC)|National Cancer Institute (NCI)	United States	Gene-Modified Lymphocytes, High-Dose Aldesleukin, and Vaccine Therapy in Treating Patients With Progressive or Recurrent Metastatic Cancer
NCT00706992	Melanoma	MART-1	Phase 2	Terminated	Jun-2008	Nov-2012	Nov-2012	0	0	National Cancer Institute	United States	Anti-MART-1 F5 Lymphocytes to Treat High-Risk Melanoma Patients
NCT00924287	Solid Tumors	HER2	Phase 1Phase 2	Terminated	Nov-2008	Dec-2010	Dec-2010	0	0	National Cancer Institute (NCI)|National Institutes of Health Clinical Center (CC)	United States	Gene Therapy Using Anti-Her-2 Cells to Treat Metastatic Cancer
NCT00923806	Solid Tumors	CEA	Phase 1	Terminated	Dec-2008	Nov-2011	Nov-2011	0	0	National Cancer Institute (NCI)|National Institutes of Health Clinical Center (CC)	United States	Gene Therapy Using Anti-CEA Cells to Treat Metastatic Cancer
NCT00586391	B-Cell Lymphoma	CD19	Phase 1	Active, not recruiting	Feb-2009	Jul-2014	Jul-2029	0	0	Baylor College of Medicine|Texas Children's Hospital|The Methodist Hospital System|Center for Cell and Gene Therapy, Baylor College of Medicine	United States	CD19 Chimeric Receptor Expressing T Lymphocytes In B-Cell Non Hodgkin's Lymphoma, ALL & CLL
NCT00924326	B-Cell Lymphoma	CD19	Phase 1Phase 2	Active, not recruiting	Feb-2009	Sep-2015	Dec-2020	0	0	National Cancer Institute (NCI)|National Institutes of Health Clinical Center (CC)	United States	CAR T Cell Receptor Immunotherapy for Patients With B-cell Lymphoma
NCT00923390	Kidney	DR4 TRAIL	Phase 1	Terminated	Mar-2009	Aug-2012	Aug-2012	0	0	National Cancer Institute	United States	Phase 1/2 Study of Metastatic Renal Cancer Using T-Cells Transduced With a T-Cell Receptor Which Recognizes TRAIL Bound to the DR4 Receptor
NCT00840853	ALL|CLL|B-Cell Lymphoma	CD19	Phase 1	Active, not recruiting	Apr-2009	Apr-2016	Apr-2031	0	0	Baylor College of Medicine|Texas Children's Hospital|The Methodist Hospital System|Center for Cell and Gene Therapy, Baylor College of Medicine	United States	Multi-virus CTLs Expressing CD19 Chimeric Receptors, CD19 Positive Malignancies Post SCT, MULTIPRAT
NCT00877110	Neuroblastoma	GD2	Phase 1	Completed	Apr-2009	Jan-2019	Jan-2019	0	0	Memorial Sloan Kettering Cancer Center	United States	Anti-GD2 3F8 Antibody and Allogeneic Natural Killer Cells for High-Risk Neuroblastoma
NCT00889954	Solid Tumors	HER2	Phase 1	Completed	May-2009	Jul-2015	Jan-2018	0	0	Baylor College of Medicine	United States	TGFBeta resistant HER2/EBV-CTLs
NCT00709033	B-Cell Lymphoma	CD19	Phase 1	Active, not recruiting	Jul-2009	May-2012	Apr-2027	0	0	Baylor College of Medicine|Center for Cell and Gene Therapy, Baylor College of Medicine|Texas Children's Hospital|The Methodist Hospital System	United States	T-cells or EBV Specific CTLs, Advanced B-Cell NHL and CLL
NCT00881920	Lymphoma|Myeloma|Leukemia	CD28	Phase 1	Recruiting	Jul-2009	Dec-2020	Jul-2034	0	0	Baylor College of Medicine|The Methodist Hospital System|Center for Cell and Gene Therapy, Baylor College of Medicine	United States	Kappa-CD28 T Lymphocytes, Chronic Lymphocytic Leukemia, B-cell Lymphoma or Multiple Myeloma, CHARKALL
NCT00910650	Metastatic Melanoma	MART-1	Phase 2	Completed	Oct-2009	May-2019	May-2019	0	0	Jonsson Comprehensive Cancer Center|California Institute of Technology|University of Southern California|University of Connecticut|National Cancer Institute (NCI)	United States	Study of Gene Modified Immune Cells in Patients With Advanced Melanoma
NCT00938626	Multiple Myeloma	CD20	Phase 1	Completed	Oct-2009	Oct-2011	Mar-2013	0	0	Barbara Ann Karmanos Cancer Institute|National Cancer Institute (NCI)	United States	Treated T Cells Followed by a Stem Cell Transplant in Treating Patients With Multiple Myeloma
NCT01044069	B-Cell Lymphoma	CD19	Phase 1	Active, not recruiting	Jan-2010	Jan-2022	Jan-2022	0	0	Bristol-Myers Squibb|Celgene|Juno	United States	JCAR-015
NCT01716364	Multiple Myeloma|AML|MDS	CD28	Phase 1	Unknown	Jan-2010	Dec-2013	Dec-2013	0	0	Peter MacCallum Cancer Centre, Australia	Australia	Safety Study of Anti LewisY Chimeric Antigen Receptor in Myeloma, Acute Myeloid Leukemia or Myelodysplastic Syndrome
NCT00902044	Sarcoma	HER2	Phase 1	Completed	Feb-2010	Dec-2019	Jul-2032	0	0	Aurora BioPharma	United States	AU-101
NCT01029366	ALL|CLL|B-Cell Lymphoma	CD19	Phase 1	Completed	Mar-2010	Jul-2015	May-2016	0	0	Novartis	United States	tisagenlecleucel-t
NCT01082926	Glioma	IL13Ra2	Phase 1	Completed	May-2010	Sep-2013	Sep-2013	0	0	City of Hope Medical Center	United States	GRm13Z40-2 CTL
NCT01140373	Prostate	PSMA	Phase 1	Active, not recruiting	Jun-2010	Jun-2021	Jun-2021	0	0	Memorial Sloan Kettering Cancer Center|United States Department of Defense	United States	Adoptive Transfer of Autologous T Cells Targeted to Prostate Specific Membrane Antigen (PSMA) for the Treatment of Castrate Metastatic Prostate Cancer (CMPC)
NCT01147016	Breast	HER2	Phase 2	Unknown	Jul-2010	Jul-2017	Dec-2018	0	0	Barbara Ann Karmanos Cancer Institute|National Cancer Institute (NCI)	United States	Targeted T Cells After Neoadjuvant Chemotherapy in Treating Women With Stage II or III Breast Cancer Undergoing Surgery
NCT01087294	B-Cell Lymphoma	CD19	Phase 1	Recruiting	Aug-2010	Mar-2023	Mar-2024	0	0	National Cancer Institute (NCI)|National Institutes of Health Clinical Center (CC)	United States	Administration of Anti-CD19-chimeric-antigen-receptor-transduced T Cells From the Original Transplant Donor to Patients With Recurrent or Persistent B-cell Malignancies After Allogeneic Stem Cell Transplantation
NCT01551043	ALL	CD19	Phase 1	Terminated	Sep-2010	May-2015	Jun-2016	0	0	Novartis	United States	tisagenlecleucel-t
NCT01109095	Glioblastoma	HER2	Phase 1	Completed	Oct-2010	Jun-2014	Mar-2018	0	0	Baylor College of Medicine	United States	HER.CAR CMV-specific CTLs
NCT01218867	Kidney	VEGFR2	Phase 1Phase 2	Terminated	Nov-2010	Sep-2014	Dec-2015	0	0	National Cancer Institute (NCI)|National Institutes of Health Clinical Center (CC)	United States	CAR T Cell Receptor Immunotherapy Targeting VEGFR2 for Patients With Metastatic Cancer
NCT01273181	Kidney	MAGE-A3 MAGE-A12	Phase 1Phase 2	Terminated	Dec-2010	Dec-2012	Dec-2012	0	0	National Cancer Institute (NCI)|National Institutes of Health Clinical Center (CC)	United States	MAGE-A3/12 Metastatic Cancer Treatment With Anti-MAGE-A3/12 TCR-Gene Engineered Lymphocytes
NCT01022138	Breast	HER2	Phase 2	Unknown	Feb-2011	Jan-2018	Jan-2018	0	0	Barbara Ann Karmanos Cancer Institute|National Cancer Institute (NCI)	United States	Laboratory-Treated T Cells After Second-Line Chemotherapy in Treating Women With HER2/Neu-Negative Metastatic Breast Cancer
NCT01192464	B-Cell Lymphoma	CD30	Phase 1	Active, not recruiting	May-2011	May-2012	Oct-2033	0	0	Baylor College of Medicine|Center for Cell and Gene Therapy, Baylor College of Medicine|Texas Children's Hospital|The Methodist Hospital System	United States	EBV CTLs Expressing CD30 Chimeric Receptors For CD 30+ Lymphoma
NCT01352286	Multiple Myeloma	NY-ESO-1	Phase 2	Completed	May-2011	Aug-2017	Jul-2019	0	0	GlaxoSmithKline	United Kingdom	letetresgene-autoleucel
NCT01355965	Mesothelioma	Mesothelin	Phase 1	Completed	May-2011	Jul-2015	Oct-2015	0	0	Novartis	United States	chimeric antigen receptor T-cell therapy, mesothelin
NCT00968760	B-Cell Lymphoma	CD19	Phase 1	Completed	Jun-2011	Apr-2020	Apr-2020	0	0	Ziopharm Oncology	United States	CD19 chimeric antigen receptor T-cell therapy
NCT01350401	Melanoma	NY-ESO-1	Phase 1Phase 2	Terminated	Jun-2011	Feb-2016	Mar-2018	0	0	Adaptimmune	United Kingdom	NYESO-1c259 T cells
NCT01373047	Liver	CEA	Phase 1	Completed	Jun-2011	Jul-2013	Jul-2013	0	0	Sorrento Therapeutics	United States	HITM-SURE
NCT01425749	Melanoma	MAGE-A3	Early Phase 1	Completed	Jun-2011	Jul-2013	Oct-2015	0	0	University of Virginia	United States	Study to Assess Safety and Immune Response of Stage IIB-IV Resected Melanoma After Treatment With MAGE-A3 ASCI
NCT01416974	CLL	CD19	Phase 1	Completed	Aug-2011	Jan-2019	Jan-2019	0	0	Memorial Sloan Kettering Cancer Center	United States	Consolidation Therapy With Autologous T Cells Genetically Targeted to the B Cell Specific Antigen CD19 in Patients With Chronic Lymphocytic Leukemia Following Upfront Chemotherapy With Pentostatin, Cyclophosphamide and Rituximab
NCT01420874	Colorectal|Pancreatic	EGFR	Phase 1	Active, not recruiting	Aug-2011	Jan-2021	Jun-2021	0	0	Barbara Ann Karmanos Cancer Institute	United States	Anti-CD3 x Anti-ErbituxÂ® Armed Activated T Cells (Phase Ib) for Gastrointestinal (GI Cancer)
NCT01626495	ALL|CLL|B-Cell Lymphoma	CD19	Phase 1Phase 2	Completed	Aug-2011	May-2018	Jul-2019	0	0	Novartis	United States	tisagenlecleucel-t
NCT01430390	ALL|CLL|B-Cell Lymphoma	CD19	Phase 1	Recruiting	Sep-2011	Sep-2021	Sep-2021	0	0	Memorial Sloan Kettering Cancer Center	United States	In Vitro Expanded Allogeneic Epstein-Barr Virus Specific Cytotoxic T-Lymphocytes (EBV-CTLs) Genetically Targeted to the CD19 Antigen in B-cell Malignancies
NCT01316146	B-Cell Lymphoma	CD30	Phase 1	Active, not recruiting	Oct-2011	Jan-2016	Dec-2030	0	0	UNC Lineberger Comprehensive Cancer Center	United States	Administration of T Lymphocytes for Hodgkin's Lymphoma and Non-Hodgkin's Lymphoma (CART CD30)
NCT01318317	B-Cell Lymphoma	CD19	Phase 1Phase 2	Active, not recruiting	Oct-2011	Aug-2022	Aug-2022	0	0	City of Hope Medical Center|National Cancer Institute (NCI)	United States	Genetically Engineered Lymphocyte Therapy After Peripheral Blood Stem Cell Transplant in Treating Patients With High-Risk, Intermediate-Grade, B-cell Non-Hodgkin Lymphoma
NCT01457131	Kidney	NY-ESO-1	Phase 1	Terminated	Oct-2011	Aug-2013	Aug-2013	0	0	Gilead|Kite Pharma	United States	NY-ESO-1 T cell therapy
NCT01495572	Melanoma	MART-1	Phase 2	Terminated	Dec-2011	Feb-2014	Feb-2014	0	0	National Cancer Institute	United States	Melanoma Treatment With White Blood Cells That Destroy MART Expressing Tumor Cells
NCT01497184	ALL|B-Cell Lymphoma	CD19	Phase 1	Active, not recruiting	Dec-2011	Dec-2020	Dec-2021	0	0	Ziopharm Oncology	United States	CD19+ Chimeric Antigen Receptor
NCT01513109	AML	WT-1	Phase 1Phase 2	Unknown	Dec-2011	Dec-2013	Dec-2014	0	0	Jules Bordet Institute	Belgium	Safety and Immunogenicity of Recombinant WT1 Antigen-Specific Cancer Immunotherapeutic Combined With Infusion of Treg Depleted T Cells for Adult WT1 Acute Myeloid Leukemia
NCT01333046	HL|NHL	NY-ESO-1	Phase 1	Recruiting	Jan-2012	Jan-2021	Jan-2026	0	0	Gilead|Kite Pharma	United States	Kite NY-ESO
NCT01477021	Sarcoma	NY-ESO-1	Phase 1	Completed	Jan-2012	Sep-2013	Sep-2013	0	0	Gilead|Kite Pharma	United States	NY-ESO-1 T cell therapy
NCT01683279	ALL	CD19	Phase 1	Completed	Mar-2012	Jan-2015	Jan-2030	0	0	Bristol-Myers Squibb|Celgene|Juno	United States	lisocabtagene maraleucel
NCT02654821	Melanoma	MART-1	Phase 1Phase 2	Unknown	Mar-2012	Oct-2019	Jan-2020	0	0	The Netherlands Cancer Institute	Netherlands	Study With T-cel Receptor Gene Therapy in Metastatic Melanoma
NCT01475058	ALL|CLL|B-Cell Lymphoma	CD19	Phase 1Phase 2	Completed	Apr-2012	Apr-2014	Jul-2014	0	0	Fred Hutchinson Cancer Research Center|National Cancer Institute (NCI)	United States	CD19 CAR T Cells for B Cell Malignancies After Allogeneic Transplant
NCT01621724	AML|CML	WT-1	Phase 1Phase 2	Completed	Apr-2012	May-2018	May-2018	0	0	Cell Medica Ltd	United Kingdom	WT1-TCR cell therapy
NCT01195480	ALL	CD19	Phase 1Phase 2	Terminated	May-2012	Nov-2015	Nov-2015	0	0	University College, London	United Kingdom	CD19-CAR Immunotherapy for Childhood Acute Lymphoblastic Leukemia (ALL)
NCT01454596	Glioma	EGFR	Phase 1Phase 2	Completed	May-2012	Nov-2018	Jan-2019	0	0	Gilead|Kite Pharma	United States	Kite EGFRvIII
NCT01583686	Solid Tumors	Mesothelin	Phase 1Phase 2	Terminated	May-2012	Dec-2018	Dec-2018	0	0	National Cancer Institute (NCI)|National Institutes of Health Clinical Center (CC)	United States	CAR T Cell Receptor Immunotherapy Targeting Mesothelin for Patients With Metastatic Cancer
NCT01593696	B-Cell Lymphoma	CD19	Phase 1	Completed	Jun-2012	Nov-2016	Oct-2017	0	0	National Cancer Institute (NCI)|National Institutes of Health Clinical Center (CC)	United States	Anti-CD19 White Blood Cells for Children and Young Adults With B Cell Leukemia or Lymphoma
NCT01586403	Melanoma	FBP	Phase 1	Active, not recruiting	Jul-2012	Sep-2028	Sep-2028	0	0	Loyola University|National Cancer Institute (NCI)	United States	Transfer of Genetically Engineered Lymphocytes in Melanoma Patients
NCT01645293	T-Cell Lymphoma	CD30	Phase 1	Unknown	Jul-2012	Jul-2012	Jul-2012	0	0	University of Cologne	Germany	Multicentre Phase I Trial of Engineered T Cells for Patients With Relapsed or Refractory Primary Cutaneous CD30+ Large T Cell Lymphoma or Transformed CD30+ Mycosis Fungoides
NCT01694472	Solid Tumors	MAGE-A4	Phase 1	Unknown	Jul-2012	Nov-2016	Dec-2016	0	0	Tianjin Medical University Cancer Institute and Hospital	China	Clinical Safety and Preliminary Efficacy of MAGE-A4 TCR Gene-Modified T Cells to Treat Malignant Tumors
NCT01343043	Synovial Sarcoma	NY-ESO-1	Phase 1	Completed	Sep-2012	Jun-2019	Jun-2019	0	0	GlaxoSmithKline	United Kingdom	letetresgene-autoleucel
NCT01460901	Neuroblastoma	GD2	Phase 1	Completed	Oct-2012	Jan-2015	Jan-2015	0	0	Children's Mercy Hospital Kansas City|National Heart, Lung, and Blood Institute (NHLBI)	United States	Study of Donor Derived, Multi-virus-specific, Cytotoxic T-Lymphocytes for Relapsed/Refractory Neuroblastoma
NCT01723306	Solid Tumors	CEA	Phase 2	Suspended	Oct-2012	Oct-2016	Aug-2017	0	0	Roger Williams Medical Center	United States	Phase II/Pilot Study of 2nd Generation Anti-CEA Designer T Cells in Adenocarcinomas
NCT01697527	Solid Tumors	NY-ESO-1	Phase 2	Active, not recruiting	Nov-2012	Nov-2021	Nov-2022	0	0	Jonsson Comprehensive Cancer Center|National Cancer Institute (NCI)	United States	NY-ESO-1 Reactive TCR
NCT01362452	Leukemia|B-Cell Lymphoma	CD19	Phase 1	Completed	Dec-2012	Jul-2017	Jul-2017	0	0	M.D. Anderson Cancer Center	United States	Infusion of Allogeneic Umbilical Cord Blood-Derived Cluster of Differentiation Antigen 19 (CD19)-Specific T Cells
NCT01640301	AML|CML|MDS	WT-1	Phase 1Phase 2	Active, not recruiting	Dec-2012	Sep-2029	Sep-2029	0	0	Bristol-Myers Squibb|Celgene|Juno	United States	JTCR-016
NCT01758328	Multiple Myeloma	WT-1	Phase 1	Active, not recruiting	Dec-2012	Dec-2021	Dec-2021	0	0	Bristol-Myers Squibb|Celgene|Juno	United States	JTCR-016
NCT01735604	ALL|CLL|B-Cell Lymphoma	CD20	Phase 1Phase 2	Unknown	Jan-2013	May-2017	Oct-2018	0	0	Cellular Biomedicine Group	China	anti-CD20-CAR
NCT01747486	CLL	CD19	Phase 2	Completed	Jan-2013	Dec-2017	Apr-2018	0	0	Novartis	United States	tisagenlecleucel-t
NCT01837602	Breast	c-MET	Phase 1	Completed	Apr-2013	Aug-2018	Aug-2018	0	0	University of Pennsylvania	United States	cMet CAR RNA T Cells Targeting Breast Cancer
NCT01840566	B-Cell Lymphoma	CD19	Phase 1	Active, not recruiting	Apr-2013	Apr-2021	Apr-2021	0	0	Memorial Sloan Kettering Cancer Center	United States	High Dose Therapy and Autologous Stem Cell Transplantation Followed by Infusion of Chimeric Antigen Receptor (CAR) Modified T-Cells Directed Against CD19+ B-Cells for Relapsed and Refractory Aggressive B Cell Non-Hodgkin Lymphoma
NCT01864889	ALL|CLL|B-Cell Lymphoma	CD19	Early Phase 1	Unknown	Apr-2013	Apr-2017	Apr-2017	0	0	Chinese PLA General Hospital	China	Treatment of Relapsed and/or Chemotherapy Refractory B-cell Malignancy by CART19 (CART19)
NCT01864902	AML	CD33	Phase 1Phase 2	Unknown	Apr-2013	Apr-2016	Apr-2017	0	0	Chinese PLA General Hospital	China	Treatment of Relapsed and/or Chemotherapy Refractory CD33 Positive Acute Myeloid Leukemia by CART-33
NCT01860937	B-Cell Lymphoma	CD19	Phase 1	Active, not recruiting	May-2013	May-2021	May-2021	0	0	Memorial Sloan Kettering Cancer Center|Dana-Farber Cancer Institute:Dana- Farber/Children's Hospital	United States	T-Lymphocytes Genetically Targeted to the B-Cell Specific Antigen CD19 in Pediatric and Young Adult Patients With Relapsed B-Cell Acute Lymphoblastic Leukemia
NCT01865617	ALL|CLL|B-Cell Lymphoma	CD19	Phase 1Phase 2	Completed	May-2013	Apr-2034	Apr-2034	0	0	Bristol-Myers Squibb|Celgene|Juno	United States	JCAR-014
NCT01869166	Solid Tumors	EGFR	Phase 1Phase 2	Unknown	May-2013	Dec-2016	Dec-2017	0	0	Cellular Biomedicine Group	China	CAR-T EGFR
NCT01653717	CLL	CD19	Phase 1	Completed	Jun-2013	Aug-2017	Aug-2017	0	0	M.D. Anderson Cancer Center	United States	CD19-specific T-cell for Chronic Lymphocytic Leukemia (CLL)
NCT01886976	Multiple Myeloma	CD138	Phase 1Phase 2	Unknown	Jun-2013	Jun-2016	Jun-2016	0	0	Chinese PLA General Hospital	China	Treatment of Chemotherapy Refractory Multiple Myeloma by CART-138 (CART-138)
NCT01567891	Ovarian	NY-ESO-1	Phase 1Phase 2	Completed	Jul-2013	Jun-2017	Jun-2017	0	0	Adaptimmune	United Kingdom	NYESO-1c259 T cells
NCT01857934	Neuroblastoma	GD2	Phase 2	Active, not recruiting	Jul-2013	Jan-2021	Jul-2021	0	0	St. Jude Children's Research Hospital	United States	Therapy for Children With Advanced Stage Neuroblastoma
NCT01897415	Pancreatic	Mesothelin	Phase 1	Completed	Jul-2013	Dec-2015	Mar-2017	0	0	Novartis	United States	chimeric antigen receptor T-cell therapy, mesothelin
NCT02988258	Haematological Cancer	CMV	Phase 1	Suspended	Jul-2013	Aug-2019	Aug-2019	0	0	University College, London	United Kingdom	Study of Adoptive Immunotherapy With Donor-derived CMV-specific T Cells for Recipients of Allo-HSCT (CMV_TCR-001)
NCT03050190	B-Cell Lymphoma	CD19	Phase 1Phase 2	Recruiting	Jul-2013	Jul-2019	Dec-2020	0	0	Shenzhen Geno-Immune Medical Institute	China	A Phase I/II Multiple Center Trial of 4SCAR19 Cells in the Treatment of Relapsed and Refractory B Cell Malignancies
NCT01822652	Neuroblastoma	GD2	Phase 1	Active, not recruiting	Aug-2013	Dec-2015	Oct-2030	0	0	Baylor College of Medicine|Center for Cell and Gene Therapy, Baylor College of Medicine|Texas Children's Hospital|The Methodist Hospital System|Solving Kidsâ€™ Cancer|The EVAN Foundation|National Cancer Institute (NCI)|Kids Cancer Research Foundation	United States	3rd Generation GD-2 Chimeric Antigen Receptor and iCaspase Suicide Safety Switch, Neuroblastoma, GRAIN
NCT01639456	AML	CD3 CD19 CD56 NK	Phase 2	Withdrawn	Oct-2013	Jan-2017	Jan-2017	0	0	Miltenyi Biomedicine	Germany	0
NCT01815749	B-Cell Lymphoma	CD19	Phase 1	Active, not recruiting	Oct-2013	Oct-2021	Oct-2021	0	0	City of Hope Medical Center|National Cancer Institute (NCI)	United States	Genetically Modified T-cell Infusion Following Peripheral Blood Stem Cell Transplant in Treating Patients With Recurrent or High-Risk Non-Hodgkin Lymphoma
NCT01892293	Multiple Myeloma	NY-ESO-1	Phase 1Phase 2	Terminated	Oct-2013	Dec-2014	Apr-2018	0	0	Adaptimmune	United Kingdom	NYESO-1c259 T cells
NCT01967823	Solid Tumors	NY-ESO-1	Phase 2	Completed	Oct-2013	Apr-2020	Apr-2020	0	0	Gilead|Kite Pharma	United States	NY-ESO-1 T cell therapy
NCT02247609	B-Cell Lymphoma	CD19	Phase 1Phase 2	Unknown	Jan-2014	Oct-2016	Oct-2017	0	0	Peking University|University of Florida	China	Evaluation of 4th Generation Safety-designed CAR T Cells Targeting High-risk and Refractory B Cell Lymphomas
NCT01853631	B-Cell Lymphoma	CD19	Phase 1	Recruiting	Feb-2014	Dec-2021	Feb-2033	0	0	Baylor College of Medicine|Center for Cell and Gene Therapy, Baylor College of Medicine|Texas Children's Hospital|The Methodist Hospital System	United States	Activated T-Cells Expressing 2nd or 3rd Generation CD19-Specific CAR, Advanced B-Cell NHL, ALL, and CLL (SAGAN)
NCT02028455	ALL|CLL	CD19	Phase 1Phase 2	Completed	Feb-2014	Sep-2020	Sep-2035	0	0	Bristol-Myers Squibb|Celgene|Juno	United States	lisocabtagene maraleucel
NCT02030834	B-Cell Lymphoma	CD19	Phase 2	Completed	Feb-2014	Sep-2019	Sep-2020	0	0	Novartis	United States	tisagenlecleucel-t
NCT02030847	ALL	CD19	Phase 2	Completed	Feb-2014	Apr-2018	Apr-2018	0	0	Novartis	United States	tisagenlecleucel-t
NCT02062359	Melanoma	NY-ESO-1	Phase 2	Terminated	Feb-2014	Feb-2016	Feb-2016	0	0	Gilead|Kite Pharma	United States	NY-ESO-1 T cell therapy
NCT02107963	Solid Tumors	GD2	Phase 1	Completed	Feb-2014	Aug-2016	Jan-2017	0	0	National Cancer Institute (NCI)|National Institutes of Health Clinical Center (CC)	United States	A Phase I Trial of T Cells Expressing an Anti-GD2 Chimeric Antigen Receptor in Children and Young Adults With GD2+ Solid Tumors
NCT02111850	Solid Tumors	MAGE-A3	Phase 1Phase 2	Active, not recruiting	Feb-2014	Dec-2023	Dec-2024	0	0	Gilead|Kite Pharma	United States	KITE-718
NCT02081937	Mantle Cell Lymphoma	CD19	Phase 1Phase 2	Unknown	Mar-2014	Dec-2018	Dec-2019	0	0	Chinese PLA General Hospital	China	CART-19 Immunotherapy in Mantle Cell Lymphoma
NCT02274584	B-Cell Lymphomas	CD30	Phase 1Phase 2	Unknown	Mar-2014	Oct-2016	Oct-2017	0	0	Peking University|University of Florida	China	CAR T Cells Targeting CD30 Positive Lymphomas (4SCAR30273)
NCT02374333	ALL|DLBCL	CD19	Phase 1	Active, not recruiting	Mar-2014	Oct-2021	Nov-2022	0	0	Novartis	United States	huCART-19 T cells
NCT01953900	Sarcoma	GD2	Phase 1	Active, not recruiting	Apr-2014	Apr-2021	Apr-2036	0	0	Baylor College of Medicine|National Cancer Institute (NCI)|Center for Cell and Gene Therapy, Baylor College of Medicine|The Methodist Hospital System|Texas Children's Hospital	United States	iC9-GD2-CAR-VZV-CTLs/Refractory or Metastatic GD2-positive Sarcoma/VEGAS
NCT02050347	B-Cell Lymphoma	CD19	Phase 1	Recruiting	Apr-2014	Dec-2021	Feb-2033	0	0	Baylor College of Medicine|Center for Cell and Gene Therapy, Baylor College of Medicine|Texas Children's Hospital|The Methodist Hospital System	United States	Activated T Lymphocytes Expressing CARs, Relapsed CD19+ Malignancies Post-Allo HSCT(CARPASCIO)
NCT02096614	Solid Tumors	MAGE-A4	Phase 1	Unknown	Apr-2014	Jun-2018	Jun-2018	0	0	Takara Bio	Japan	TBI-1201
NCT02132624	B-Cell Lymphoma	CD19	Phase 1Phase 2	Completed	Apr-2014	May-2017	May-2017	0	0	Uppsala University|Uppsala University Hospital	Sweden	CD19-targeting 3rd Generation CAR T Cells for Refractory B Cell Malignancy - a Phase I/IIa Trial.
NCT02051257	B-Cell Lymphoma	CD19	Phase 1	Active, not recruiting	May-2014	Jun-2021	Jun-2021	0	0	City of Hope Medical Center|National Cancer Institute (NCI)	United States	Memory Enriched T Cells Following Stem Cell Transplant in Treating Patients With Recurrent B-Cell Non-Hodgkin Lymphoma
NCT02134262	B-Cell Lymphoma	CD19	Phase 1Phase 2	Unknown	May-2014	Mar-2017	Mar-2017	0	0	Takara Bio	Japan	TBI-1501
NCT02135406	Multiple Myeloma	CD19	Phase 1	Completed	May-2014	Sep-2015	Jan-2018	0	0	Novartis	United States	tisagenlecleucel-t
NCT02159716	Pancreatic|Ovarian|Mesothelioma	Mesothelin	Phase 1	Completed	Jun-2014	Nov-2015	Nov-2015	0	0	Novartis	United States	chimeric antigen receptor T-cell therapy, mesothelin
NCT02059850	Synovial sarcoma|Liposarcoma	NY-ESO-1	Phase 1	Withdrawn	Jul-2014	Jan-2016	Jan-2016	0	0	Gilead|Kite Pharma	United States	NY-ESO-1 T cell therapy
NCT02070406	Solid Tumors	NY-ESO-1	Phase 1	Terminated	Jul-2014	Dec-2018	Dec-2018	0	0	Jonsson Comprehensive Cancer Center|National Cancer Institute (NCI)	United States	NY-ESO-1 Reactive TCR
NCT02153905	Solid Tumors	MAGE-A3 MAGE-A6	Phase 1Phase 2	Terminated	Jul-2014	Sep-2018	Sep-2018	0	0	Gilead|Kite Pharma	United States	MAGE-A3 TCR PBL cell therapy
NCT02215967	Multiple Myeloma	BCMA	Phase 1	Completed	Aug-2014	Apr-2019	Aug-2019	0	0	National Cancer Institute (NCI)|National Institutes of Health Clinical Center (CC)	United States	Study of T Cells Targeting B-Cell Maturation Antigen for Previously Treated Multiple Myeloma
NCT02228096	ALL	CD19	Phase 2	Completed	Aug-2014	May-2018	May-2019	0	0	Novartis	United States	tisagenlecleucel-t
NCT02146924	B-Cell Lymphoma	CD19	Phase 1	Recruiting	Sep-2014	Sep-2022	Sep-2022	0	0	City of Hope Medical Center|National Cancer Institute (NCI)	United States	Cellular Immunotherapy in Treating Patients With High-Risk Acute Lymphoblastic Leukemia
NCT02153580	B-Cell Lymphoma	CD19	Phase 1	Recruiting	Sep-2014	Dec-2021	Dec-2021	0	0	City of Hope Medical Center|National Cancer Institute (NCI)	United States	Cellular Immunotherapy Following Chemotherapy in Treating Patients With Recurrent Non-Hodgkin Lymphomas, Chronic Lymphocytic Leukemia or B-Cell Prolymphocytic Leukemia
NCT01795976	Oesophageal	NY-ESO-1	Phase 2	Terminated	Oct-2014	Nov-2017	Nov-2017	0	0	The Christie NHS Foundation Trust|Erasmus Medical Center|Ospedale San Raffaele|University College London Hospitals|Karolinska University Hospital|The Netherlands Cancer Institute	United Kingdom	NY-ESO-1 T Cells in OG Cancer
NCT02259556	B-Cell Lymphoma	CD30	Phase 1Phase 2	Recruiting	Oct-2014	Oct-2018	Oct-2029	0	0	Cellular Biomedicine Group	China	CBM-CD30.1
NCT02274506	ALL|CLL|B-Cell Lymphoma	CD19	Phase 1	Withdrawn	Oct-2014	Oct-2014	Oct-2014	0	0	M.D. Anderson Cancer Center	United States	Infusion of Allogeneic, 3rd Party CD19-specific T Cells
NCT02277522	HL	CD19	Early Phase 1	Terminated	Oct-2014	Nov-2016	Jun-2017	0	0	Novartis	United States	tisagenlecleucel-t
NCT02280811	Cervix	HPV16-E6	Phase 1Phase 2	Completed	Oct-2014	Jun-2016	Jun-2016	0	0	Bluebird Bio	United States	HPV-16 E6 TCRs
NCT02173093	Neuroblastoma|Osteosarcoma	GD2	Phase 1Phase 2	Unknown	Nov-2014	Dec-2019	Dec-2019	0	0	Barbara Ann Karmanos Cancer Institute|National Cancer Institute (NCI)	United States	Activated T Cells Armed With GD2 Bispecific Antibody in Children and Young Adults With Neuroblastoma and Osteosarcoma
NCT02209376	Glioblastoma	EGFR	Phase 1	Terminated	Nov-2014	Apr-2018	Apr-2018	0	0	Novartis	United States	chimeric antigen receptor T-cell therapy, EGFRVIII
NCT02311621	Neuroblastoma	CD171	Phase 1	Recruiting	Nov-2014	Nov-2022	Nov-2037	0	0	Bristol-Myers Squibb|Celgene|Juno	United States	JCAR-023
NCT02315118	B-Cell Lymphoma	CD20	Phase 1Phase 2	Unknown	Dec-2014	Dec-2017	Dec-2018	0	0	National University Hospital, Singapore	Singapore	Pilot Study of Autologous T Lymphocytes With ADCC in Patients With CD20-Positive B-Cell Malignancies
NCT02315612	ALL|B-Cell Lymphomas	CD22	Phase 1	Recruiting	Dec-2014	Jun-2025	Jun-2040	0	0	Bristol-Myers Squibb|Celgene|Juno	United States	JCAR-018
NCT02331693	Glioma	EGFR	Phase 1	Unknown	Dec-2014	Dec-2015	Dec-2016	0	0	CARsgen Therapeutics	China	CSG-EGFR
NCT02349698	Leukemia|B-Cell Lymphoma	CD19	Phase 1Phase 2	Recruiting	Dec-2014	Dec-2022	Dec-2023	0	0	Southwest Hospital, China	China	A Clinical Research of CAR T Cells Targeting CD19 Positive Malignant B-cell Derived Leukemia and Lymphoma
NCT02349724	Solid Tumors	CEA	Phase 1	Unknown	Dec-2014	Dec-2018	Dec-2019	0	0	Southwest Hospital, China	China	A Clinical Research of CAR T Cells Targeting CEA Positive Cancer
NCT01740557	Melanoma	CXCR2+NGFR	Phase 1Phase 2	Active, not recruiting	Jan-2015	Jan-2021	Jan-2021	0	0	M.D. Anderson Cancer Center|National Cancer Institute (NCI)	United States	Genetically Modified Therapeutic Autologous Lymphocytes Followed by Aldesleukin in Treating Patients With Stage III or Metastatic Melanoma
NCT02194374	CLL	ROR1	Phase 1	Withdrawn	Jan-2015	Jun-2017	Jun-2017	0	0	M.D. Anderson Cancer Center|CLL Global Research Foundation Alliance	United States	Autologous ROR1R-CAR-T Cells for Chronic Lymphocytic Leukemia (CLL)
NCT02319824	Sarcoma	NY-ESO-1	Phase 1	Completed	Jan-2015	Jun-2015	Jun-2015	0	0	Fred Hutchinson Cancer Research Center|National Cancer Institute (NCI)	United States	NY-ESO-1-Specific T-cells in Treating Patients With Advanced NY-ESO-1-Expressing Sarcomas Receiving Palliative Radiation Therapy
NCT02348216	B-Cell Lymphoma	CD19	Phase 1Phase 2	Completed	Jan-2015	Sep-2020	Sep-2035	0	0	Gilead|Kite Pharma	United States	axicabtagene ciloleucel
NCT01722149	Mesothelioma	CD8	Early Phase 1	Completed	Feb-2015	Mar-2019	Jul-2019	0	0	University of Zurich	Switzerland	Re-directed T Cells for the Treatment (FAP)-Positive Malignant Pleural Mesothelioma
NCT02870244	Melanoma	Tyrosinase	Phase 1	Recruiting	Feb-2015	Sep-2028	Sep-2028	0	0	Loyola University|National Cancer Institute (NCI)	United States	Adoptive T Cell Immunotherapy for Advanced Melanoma Using Engineered Lymphocytes
NCT02203825	AML|Multiple Myeloma	NKG2D	Phase 1	Completed	Mar-2015	Mar-2018	Mar-2018	0	0	Celyad Oncology	Belgium	CYAD-01
NCT02366546	Solid Tumors	NY-ESO-1	Phase 1	Unknown	Mar-2015	Sep-2018	Sep-2018	0	0	Takara Bio	Japan	TBI 1301
NCT02388828	Pancreatic|Ovarian|Mesothelioma	Mesothelin	LTFU	Completed	Mar-2015	Jul-2019	Jul-2019	0	0	Novartis	United States	mesoCART
NCT02390739	Thyroid	hTG	Phase 1Phase 2	Withdrawn	Mar-2015	Mar-2017	Mar-2017	0	0	National Cancer Institute	United States	Administering Peripheral Blood Lymphocytes Transduced With a Murine T-Cell Receptor Recognizing Human Thyroglobulin to People With Thyroglobulin Expressing Thyroid Cancer
NCT02395250	Liver	GPC3	Phase 1	Completed	Mar-2015	Jun-2016	Nov-2018	0	0	CARsgen Therapeutics	China	KJgpc3-001
NCT02968472	B-Cell Lymphoma	CD19	Phase 1	Unknown	Mar-2015	May-2019	May-2019	0	0	Shenzhen Geno-Immune Medical Institute	China	A Phase I Trial of 4SCAR19 Cells in the Treatment of Relapsed and Refractory B Cell Leukemia
NCT02239861	Rhabdomyosarcoma	MAGE-A4	Phase 1	Active, not recruiting	Apr-2015	Oct-2018	Dec-2024	0	0	Baylor College of Medicine|The Methodist Hospital System|Center for Cell and Gene Therapy, Baylor College of Medicine|Texas Children's Hospital|Solving Kidsâ€™ Cancer|Pierce Phillips Charity	United States	TAA-Specific CTLS for Solid Tumors (TACTASOM)
NCT02291848	Multiple Myeloma	MAGE-A4	Phase 1	Recruiting	Apr-2015	Jun-2021	Jun-2021	0	0	Marker Therapeutics; Baylor College of Medicine|The Methodist Hospital System|Center for Cell and Gene Therapy, Baylor College of Medicine	United States	TUMOR-ASSOCIATED ANTIGEN-SPECIFIC CYTOTOXIC T-LYMPHOCYTES FOR MULTIPLE MYELOMA
NCT02416466	Liver	CEA	Phase 1	Completed	Apr-2015	Nov-2016	Jun-2018	0	0	Roger Williams Medical Center|Sirtex Medical	United States	CAR-T Hepatic Artery Infusions and Sir-Spheres for Liver Metastases
NCT02435849	ALL	CD19	Phase 2	Active, not recruiting	Apr-2015	Nov-2022	Nov-2022	0	0	Novartis	United States	tisagenlecleucel-t
NCT02456350	ALL|CLL|B-Cell Lymphoma	CD19	Phase 1	Unknown	Apr-2015	Dec-2019	Dec-2019	0	0	Shenzhen Institute for Innovation and Translational Medicine	China	Anti-CD19 Chimeric Antigen Receptor (CAR)-Transduced T Cell Therapy for Patients With B Cell Malignancies
NCT02457650	Bladder	NY-ESO-1	Phase 1	Unknown	Apr-2015	Dec-2019	Dec-2019	0	0	Shenzhen Institute for Innovation and Translational Medicine	China	T Cell Receptor-transduced T Cells Targeting NY-ESO-1 for Treatment of Patients With NY-ESO-1- Expressing Malignancies
NCT02208362	Glioma	IL13Ra2	Phase 1	Recruiting	May-2015	Jan-2022	Jan-2022	0	0	Mustang Bio	United States	MB-101
NCT02408016	NSCLC|Mesothelioma	WT-1	Phase 1Phase 2	Completed	May-2015	Jun-2020	Jun-2022	0	0	Bristol-Myers Squibb|Celgene|Juno	United States	JTCR-016
NCT02414269	Malignant Pleural Effusion	Mesothelin	Phase 1Phase 2	Recruiting	May-2015	Apr-2021	Apr-2021	0	0	Memorial Sloan Kettering Cancer Center	United States	Malignant Pleural Disease Treated With Autologous T Cells Genetically Engineered to Target the Cancer-Cell Surface Antigen Mesothelin
NCT02465983	Pancreatic	Mesothelin	Phase 1	Terminated	May-2015	Sep-2017	Nov-2017	0	0	Novartis	United States	chimeric antigen receptor T-cell therapy, mesothelin
NCT02470559	Ovarian|Fallopian Tube|Peritoneal	EGFR	Phase 1	Withdrawn	Jun-2015	Feb-2017	Feb-2017	0	0	Barbara Ann Karmanos Cancer Institute|National Cancer Institute (NCI)	United States	Activated T-cell Therapy, Low-Dose Aldesleukin, and Sargramostim in Treating Patients With Ovarian, Fallopian Tube, or Primary Peritoneal Cancer That is Stage III-IV, Refractory, or Recurrent
NCT02541370	Solid Tumors	CD133	Phase 1Phase 2	Completed	Jun-2015	Jun-2019	Jun-2019	0	0	Chinese PLA General Hospital	China	CART133
NCT02723942	Liver	GPC3	Phase 1Phase 2	Withdrawn	Jun-2015	Aug-2016	Aug-2016	0	0	Fuda Cancer Hospital, Guangzhou	China	CAR-T Cell Immunotherapy for HCC Targeting GPC3
NCT02813837	B-Cell Lymphoma	CD19	Phase 2	Recruiting	Jun-2015	Jan-2021	Jul-2021	0	0	Innovative Cellular Therapeutics	China	ICTCAR-011
NCT02445248	DLBCL	CD19	Phase 2	Active, not recruiting	Jul-2015	Feb-2023	Feb-2023	Nov-2017	Jun-2018	Novartis	United States	tisagenlecleucel-t
NCT02537977	Leukemia|B-Cell Lymphoma	CD19	Phase 1Phase 2	Unknown	Jul-2015	Jun-2020	Jun-2020	0	0	Shanghai Tongji Hospital, Tongji University School of Medicine	China	CD19-directed CAR T Cells Therapy in Relapsed/Refractory B Cell Malignancy
NCT02719782	Liver	HBV	Phase 1	Unknown	Jul-2015	May-2019	Dec-2019	0	0	Lion TCR	Singapore	Liocyx-D; Liocyx-M
NCT02728882	B-Cell Lymphoma	CD19	Phase 2	Unknown	Jul-2015	Jul-2019	Jul-2019	0	0	Sinobioway Cell Therapy	China	Sinobioway-CD19
NCT02498912	Solid Tumors	MUC16	Phase 1	Active, not recruiting	Aug-2015	Aug-2022	Aug-2022	0	0	Bristol-Myers Squibb|Celgene|Juno	United States	JCAR-020
NCT02521090	Glioblastoma	EGFR	Phase 1Phase 2	Withdrawn	Aug-2015	Mar-2016	Mar-2016	0	0	Barbara Ann Karmanos Cancer Institute|National Cancer Institute (NCI)	United States	EGFRBi-Armed Autologous T Cells in Treating Patients With Recurrent or Refractory Glioblastoma
NCT02535364	B-Cell Lymphoma	CD19	Phase 2	Terminated	Aug-2015	Apr-2017	Sep-2017	0	0	Bristol-Myers Squibb|Celgene|Juno	United States	JCAR-015
NCT02379520	Solid Tumors	HPV-16+E6	Phase 1	Recruiting	Sep-2015	Oct-2021	Oct-2033	0	0	Baylor College of Medicine|Center for Cell and Gene Therapy, Baylor College of Medicine|The Methodist Hospital System	United States	HPV-16/18 E6/E7-Specific T Lymphocytes, Relapsed HPV-Associated Cancers, HESTIA
NCT02546167	Multiple Myeloma	BCMA	Phase 1	Completed	Sep-2015	Aug-2019	Jul-2020	0	0	Novartis	United States	MTV-273
NCT02547948	B-Cell Lymphoma	CD19	Phase 1Phase 2	Withdrawn	Sep-2015	Aug-2016	Aug-2016	0	0	Fuda Cancer Hospital, Guangzhou	China	CD19-targeting CAR T Cells for B Cell Lymphoma
NCT02547961	Breast	HER2	Phase 1Phase 2	Withdrawn	Sep-2015	Aug-2016	Aug-2016	0	0	Fuda Cancer Hospital, Guangzhou	China	Chimeric Antigen Receptor-Modified T Cells for Breast Cancer
NCT02550535	AML|MDS	WT-1	Phase 1Phase 2	Completed	Sep-2015	May-2018	May-2018	0	0	Cell Medica Ltd	United Kingdom	WT1-TCR cell therapy
NCT02575261	Glioma	EphA2	Phase 1Phase 2	Withdrawn	Sep-2015	Aug-2016	Aug-2016	0	0	Fuda Cancer Hospital, Guangzhou	China	CAR-T Cell Immunotherapy for EphA2 Positive Malignant Glioma Patients
NCT02644655	B-Cell Lymphoma	CD19	Phase 1Phase 2	Unknown	Sep-2015	Mar-2017	Sep-2017	0	0	Second Military Medical University	China	Immunotherapy Using Autologous T Cell-Engineered With CD19-specific Chimeric Antigen Receptor for the Treatment of Recurrent /Refractory B Cell Leukemia
NCT02580747	Pancreatic|Ovarian|Mesothelioma|Breast	Mesothelin	Phase 1	Unknown	Oct-2015	Nov-2017	Nov-2018	0	0	Chinese PLA General Hospital	China	Treatment of Relapsed and/or Chemotherapy Refractory Advanced Malignancies by CART-meso
NCT02587689	Liver|NSCLC|Pancreatic|Breast	MUC1	Phase 1Phase 2	Unknown	Oct-2015	Oct-2017	Oct-2018	0	0	PersonGen Biomedicine	China	anti-MUC1 CAR-T cells
NCT02588456	ALL	CD22	Phase 1	Terminated	Oct-2015	Sep-2017	Sep-2017	0	0	University of Pennsylvania	United States	Pilot Study of Autologous Anti-CD22 Chimeric Antigen Receptor Redirected T Cells In Patients With Chemotherapy Resistant Or Refractory Acute Lymphoblastic Leukemia
NCT02799550	ALL	CD19	Phase 1	Unknown	Oct-2015	May-2019	May-2020	0	0	The Affiliated Hospital of the Chinese Academy of Military Medical Sciences|Chinese PLA General Hospital	China	Allogeneic CART-19 for Elderly Relapsed/Refractory CD19+ ALL
NCT02799680	AML	CD33	Phase 1	Unknown	Oct-2015	May-2017	May-2018	0	0	The Affiliated Hospital of the Chinese Academy of Military Medical Sciences|Chinese PLA General Hospital	China	Allogeneic CART-33 for Relapsed/Refractory CD33+ AML
NCT03090659	Multiple Myeloma	BCMA	Phase 1Phase 2	Active, not recruiting	Oct-2015	Dec-2021	Dec-2021	0	0	Legend Biotech|Janssen	China	ciltacabtagene autoleucel
NCT03252171	Glioma	GD2	Phase 1Phase 2	Withdrawn	Oct-2015	Aug-2016	Aug-2016	0	0	Fuda Cancer Hospital, Guangzhou	China	CAR-T Cell Immunotherapy for GD2 Positive Glioma Patients
NCT02445222	ALL|CLL|B-Cell Lymphoma	CD19	LTFU	Recruiting	Nov-2015	Feb-2036	Feb-2036	0	0	Novartis	United States	Kymriah
NCT02592577	NSCLC	MAGE-A10	Phase 1	Completed	Nov-2015	Mar-2020	Dec-2034	0	0	Adaptimmune	United Kingdom	Adaptimmune A10
NCT02601313	B-Cell Lymphoma	CD19	Phase 2	Completed	Nov-2015	Jul-2019	Jul-2038	Jan-2020	Aug-2020	Gilead|Kite Pharma	United States	brexucabtagene autoleucel
NCT02617134	Glioma|Colorectal|Gastric	MUC1	Phase 1Phase 2	Unknown	Nov-2015	Nov-2017	Nov-2018	0	0	PersonGen Biomedicine	China	anti-MUC1 CAR-T cells
NCT02624258	HL	CD19	Early Phase 1	Terminated	Nov-2015	Jun-2019	Dec-2019	0	0	Novartis	United States	tisagenlecleucel-t
NCT02725125	Stomach	EpCAM	Phase 1	Unknown	Nov-2015	Nov-2019	Nov-2019	0	0	Sinobioway Cell Therapy	China	Sinobioway-EPCAM
NCT02729493	Liver	EpCAM	Phase 2	Unknown	Nov-2015	Nov-2019	Nov-2019	0	0	Sinobioway Cell Therapy	China	Sinobioway-EPCAM
NCT02735291	Leukaemia	CD19	Phase 2	Completed	Nov-2015	Dec-2019	Dec-2025	0	0	Sinobioway Cell Therapy	China	CD19-targeted chimeric antigen receptor T-cells
NCT02159495	AML|BPDCN	CD123	Phase 1	Recruiting	Dec-2015	Dec-2021	Dec-2021	0	0	Mustang Bio	United States	MB-102
NCT02529813	Leukaemia|B-Cell Lymphoma	CD19	Phase 1	Active, not recruiting	Dec-2015	Dec-2021	Dec-2021	0	0	Ziopharm Oncology	United States	CD19 chimeric antigen receptor T-cell therapy
NCT02620865	Pancreas	EGFR	Phase 1Phase 2	Unknown	Dec-2015	Dec-2020	Dec-2020	0	0	Barbara Ann Karmanos Cancer Institute|National Cancer Institute (NCI)	United States	Bispecific Antibody Armed Activated T-cells With Aldesleukin and Sargramostim in Treating Patients With Locally Advanced or Metastatic Pancreatic Cancer
NCT02623582	AML	CD123	Early Phase 1	Terminated	Dec-2015	Aug-2016	Nov-2016	0	0	University of Pennsylvania	United States	CD123 Redirected Autologous T Cells for AML
NCT02652910	B-Cell Lymphoma	CD19	Phase 1Phase 2	Unknown	Dec-2015	Jun-2019	Dec-2019	0	0	Xuzhou Medical University	China	Memory-enriched CAR-T Cells Immunotherapy for B Cell Lymphoma
NCT02658929	Multiple Myeloma	BCMA	Phase 1	Active, not recruiting	Dec-2015	Jul-2019	Dec-2022	0	0	Bluebird Bio	United States	idecabtagene vicleucel
NCT02686372	Liver	HBV	Phase 1	Unknown	Dec-2015	Nov-2017	Nov-2020	0	0	Lion TCR	Singapore	Liocyx-D; Liocyx-M
NCT02965092	ALL|B-Cell Lymphoma	CD19	Phase 1Phase 2	Recruiting	Dec-2015	Jan-2021	Dec-2021	0	0	Wuhan Sian Medical Technology	China	CD19 Chimeric Antigen Receptor (CAR)-Modified T Cell Therapy in Treating Patients With B-cell Malignancies
NCT03919240	ALL	CD19	Phase 1Phase 2	Recruiting	Dec-2015	Dec-2020	Dec-2023	0	0	Shanghai Unicar-Therapy Bio-medicine Technology Co.,Ltd	China	CAR-T Cell Therapy Targeting to CD19 for R/R ALL
NCT02631044	B-Cell Lymphoma	CD19	Phase 1	Recruiting	Jan-2016	Dec-2022	Dec-2022	0	0	Bristol-Myers Squibb|Celgene|Juno	United States	lisocabtagene maraleucel
NCT02640209	CLL	CD19	Early Phase 1	Terminated	Jan-2016	Oct-2018	Jul-2019	0	0	Novartis	United States	tisagenlecleucel-t
NCT02650414	B-Cell Lymphoma	CD22	Phase 1	Recruiting	Jan-2016	Dec-2021	Dec-2022	0	0	University of Pennsylvania|Children's Hospital of Philadelphia	United States	CD22 Redirected Autologous T Cells for ALL
NCT02650999	B-Cell Lymphoma	CD19	Phase 1Phase 2	Active, not recruiting	Jan-2016	Feb-2019	Dec-2021	0	0	Novartis	United States	tisagenlecleucel-t
NCT02659943	B-Cell Lymphoma	CD19	Phase 1	Completed	Jan-2016	Jun-2018	Dec-2022	0	0	Gilead|Kite Pharma	United States	Humanized anti-CD19 Control CAR (3rd Gen)
NCT02672501	ALL|CLL	CD19	Phase 1Phase 2	Unknown	Jan-2016	Jun-2018	Dec-2019	0	0	Shanghai GeneChem Co., Ltd.	China	A Study to Assess CD19-targeted Immunotherapy T Cells in Patients With Relapsed or Refractory CD19+ B Cell Leukemia
NCT02822326	ALL	CD19	Phase 1	Unknown	Jan-2016	Sep-2019	Sep-2019	0	0	Guangdong General Hospital|Chinese Academy of Sciences|Guangdong Zhaotai InVivo Biomedicine Company Limited	China	Phase I Study of CD19-CAR-T2 Cells for Patients With Chemotherapy Resistant or Refractory CD19+ Acute Leukemia
NCT03076437	ALL|CLL|B-Cell Lymphoma	CD19	Phase 1Phase 2	Unknown	Jan-2016	Dec-2019	Dec-2019	0	0	Shenzhen Institute for Innovation and Translational Medicine	China	Anti-CD19 Chimeric Antigen Receptor (CAR)-Transduced T Cell Therapy for Patients With B Cell Malignancies
NCT03391726	B-Cell Lymphoma	CD19	Phase 2Phase 3	Unknown	Jan-2016	Dec-2019	Dec-2020	0	0	Fujian Medical University	China	Kymriah
NCT03391739	ALL	CD19	Phase 2Phase 3	Unknown	Jan-2016	Dec-2019	Dec-2019	0	0	Fujian Medical University	China	0
NCT03407859	ALL	CD20+CD22+CD10	Early Phase 1	Enrolling by invitation	Jan-2016	Dec-2020	Dec-2021	0	0	Zhujiang Hospital	China	Sequential Treatment With CD20/CD22/CD10-CART After CD19-CART Treatment Base on MRD in Relapsed/Refractory B-ALL
NCT02442297	Glioblastoma	HER2	Phase 1	Recruiting	Feb-2016	Feb-2021	Jan-2031	0	0	Aurora BioPharma/Baylor College of Medicine	United States	AU-101
NCT02475707	ALL	PRAME	Phase 1	Active, not recruiting	Feb-2016	Oct-2019	Oct-2024	0	0	Marker Therapeutics;Baylor College of Medicine|Texas Children's Hospital|The Methodist Hospital System|Center for Cell and Gene Therapy, Baylor College of Medicine	United States	Administration of Donor MultiTAA-Specific T Cells for ALL
NCT02494167	AML|MDS	NY-ESO-1	Phase 1	Recruiting	Feb-2016	Apr-2022	Feb-2025	0	0	Marker Therapeutics; Baylor College of Medicine|Texas Children's Hospital|The Methodist Hospital System|Center for Cell and Gene Therapy, Baylor College of Medicine|American Society for Blood and Marrow Transplantation (ASBMT)|Cancer Prevention Research Institute of Texas	United States	Administration of Donor Multi TAA-Specific T Cells for AML or MDS (ADSPAM)
NCT02588612	NSCLC	NY-ESO-1	Phase 1	Completed	Feb-2016	Aug-2020	Aug-2020	0	0	GlaxoSmithKline	United Kingdom	letetresgene-autoleucel
NCT02625480	B-Cell Lymphoma	CD19	Phase 1Phase 2	Recruiting	Feb-2016	Aug-2023	Aug-2038	0	0	Gilead|Kite Pharma	United States	brexucabtagene autoleucel
NCT02662348	Gastric|Pancreatic|Liver	HER2	Phase 1	Unknown	Feb-2016	Nov-2017	Nov-2017	0	0	Abingen Ltd, Nanjing|The First Affiliated Hospital with Nanjing Medical University	China	T Cell Mediated Adaptive Therapy for Her2-positive Neoplasms of Digestive System
NCT02685670	B-Cell Lymphoma	CD19	Phase 1Phase 2	Unknown	Feb-2016	Dec-2017	Dec-2019	0	0	The Second Affiliated Hospital of Henan University of Traditional Chinese Medicine|Xinqiao Hospital of Chongqing|Xuzhou Medical University	China	Competitive Transfer of Î±CD19-TCRz-CD28 and Î±CD19-TCRz-CD137 CAR-T Cells for B-cell Leukemia/Lymphoma
NCT02761915	Neuroblastoma	GD2	Phase 1	Completed	Feb-2016	Dec-2020	Dec-2020	0	0	Autolus	United Kingdom	AUTO-6
NCT02614066	B-Cell Lymphoma	CD19	Phase 1Phase 2	Completed	Mar-2016	Sep-2020	Sep-2035	0	0	Gilead|Kite Pharma	United States	brexucabtagene autoleucel
NCT02706392	Breast	ROR-1	Phase 1	Recruiting	Mar-2016	Dec-2021	Dec-2036	0	0	Bristol-Myers Squibb|Celgene|Juno	United States	JCAR-024
NCT02706782	Pancreas	Mesothelin	Phase 1	Unknown	Mar-2016	Feb-2018	Sep-2018	0	0	Shanghai GeneChem Co., Ltd.	China	A Study of Mesothelin Redirected Autologous T Cells for Advanced Pancreatic Carcinoma
NCT02710149	Leukemia|B-Cell Lymphoma	CD20	Phase 1Phase 2	Recruiting	Mar-2016	Mar-2020	Mar-2021	0	0	Southwest Hospital, China	China	A Clinical Research of CD20-Targeted CAR-T in B Cell Malignancies
NCT02713984	Ovarian|Breast|Lung|Pancreatic	HER2	Phase 1Phase 2	Withdrawn	Mar-2016	Jul-2019	Jul-2019	0	0	Southwest Hospital, China	China	A Clinical Research of CAR T Cells Targeting HER2 Positive Cancer
NCT02715362	Liver	GPC3	Phase 1Phase 2	Unknown	Mar-2016	Jul-2018	Mar-2019	0	0	Shanghai GeneChem Co., Ltd.	China	A Study of GPC3 Redirected Autologous T Cells for Advanced HCC
NCT02721407	B-Cell Lymphoma	CD22	Phase 1	Unknown	Mar-2016	Dec-2018	Dec-2019	0	0	Xuzhou Medical University	China	Anti-CD22 CAR-T Therapy for CD19-refractory or Resistant Lymphoma Patients
NCT02737085	B-Cell Lymphoma	CD19 CD20	Phase 1Phase 2	Unknown	Mar-2016	Dec-2019	Dec-2019	0	0	Southwest Hospital, China	China	the Sequential Therapy of CD19-targeted and CD20-targeted CAR-T Cell Therapy for Diffuse Large B Cell Lymphoma(DLBCL)
NCT02742727	AML|T-Cell Lymphoma	CD7	Phase 1Phase 2	Unknown	Mar-2016	Mar-2017	Mar-2018	0	0	PersonGen Biomedicine	China	anti-CD7 CAR-pNK cells
NCT02765243	Neuroblastoma	GD2	Phase 1	Recruiting	Mar-2016	May-2019	Dec-2020	0	0	Zhujiang Hospital	China	Anti-GD2 4th Generation CART Cells Targeting Refractory and/or Recurrent Neuroblastoma
NCT02876978	Lung, Squamous Cell	GPC3	Phase 1	Unknown	Mar-2016	Oct-2017	Apr-2019	0	0	CARsgen Therapeutics	China	CSG-GPC3
NCT02443831	ALL|Burkitt Lymphoma	CD19	Phase 1	Completed	Apr-2016	Nov-2019	Dec-2030	0	0	Autolus	United Kingdom	AUTO-1
NCT02786511	Multiple Myeloma	BCMA	LTFU	Completed	Apr-2016	Oct-2019	Oct-2019	0	0	Bluebird Bio	United States	bb-2121
NCT03366350	ALL|B-Cell Lymphoma	CD19	Phase 1Phase 2	Recruiting	Apr-2016	Jan-2021	Jun-2021	0	0	Wuhan Sian Medical Technology	China	Anti-CD19 CAR-T Therapy Bridging to HSCT for CD19+ B-Cell Malignancies
NCT02666248	Cancer, unspecified	EGFR	LTFU	Completed	May-2016	Jan-2018	Jan-2018	0	0	Novartis	United States	huEGFRvIII
NCT02782351	ALL|B-Cell Lymphoma	CD19	Phase 1Phase 2	Unknown	May-2016	Jun-2018	Dec-2018	0	0	iCarTAB BioMed Inc.|Huaian first people's hospital|Xuzhou Medical University	China	Humanized CAR-T Therapy for Treatment of B Cell Malignancy
NCT02810223	ALL	CD19	Phase 1	Unknown	May-2016	Dec-2017	Dec-2017	0	0	Beijing Sanwater Biological Technology Co., Ltd.	China	Efficacy of CART-19 Cell Therapy in B Cell Acute Lymphoblastic Leukemia
NCT02992210	Solid Tumors	GD2	Phase 1Phase 2	Unknown	May-2016	Jun-2019	Dec-2020	0	0	Shenzhen Geno-Immune Medical Institute	China	Study on GD2 Positive Solid Tumors by 4SCAR-GD2
NCT03366324	ALL|B-Cell Lymphoma	CD19	Phase 1Phase 2	Recruiting	May-2016	Jan-2021	Jun-2021	0	0	Wuhan Sian Medical Technology	China	Anti-CD19 CAR-T Therapy Combine With HSCT to Treat MRD+ B-cell Malignancies
NCT02167360	ALL	CD19	Phase 2	Withdrawn	Jun-2016	Jan-2017	Jan-2017	0	0	Novartis	United States	tisagenlecleucel-t
NCT02431988	B-cell Lymphomas	CD19	Phase 1	Active, not recruiting	Jun-2016	Mar-2021	Mar-2021	0	0	University College, London	United Kingdom	Evaluation of CAR19 T-cells as an Optimal Bridge to Allogeneic Transplantation
NCT02792114	Breast	Mesothelin	Phase 1	Recruiting	Jun-2016	Jun-2021	Jun-2021	0	0	Memorial Sloan Kettering Cancer Center|United States Department of Defense	United States	T-Cell Therapy for Advanced Breast Cancer
NCT02794246	Multiple Myeloma	CD19	Phase 2	Terminated	Jun-2016	Feb-2019	May-2019	0	0	Novartis	United States	tisagenlecleucel-t
NCT02794961	B-Cell Lymphoma	CD22	Phase 1Phase 2	Unknown	Jun-2016	Jun-2018	Jun-2019	0	0	iCarTAB BioMed Inc.|Huaian first people's hospital|Xuzhou Medical University	China	CD22 Targeting CAR-T Therapy Against B Cell Hematological Malignancies
NCT02808442	ALL	CD19	Phase 1	Completed	Jun-2016	Sep-2020	Nov-2020	0	0	Cellectis	France	UCART-19
NCT02842138	B-Cell Lymphoma	CD19	Phase 1	Completed	Jun-2016	Feb-2018	Aug-2019	0	0	Marino Biotechnology	China	CD19-CAR-T cell therapy
NCT02862704	Liver	MG7	Phase 1Phase 2	Unknown	Jun-2016	May-2017	Dec-2017	0	0	Shanghai GeneChem Co., Ltd.	China	A Study of MG7 Redirected Autologous T Cells for Advanced MG7 Positive Liver Metastases(MG7-CART)
NCT02963038	B-Cell Lymphoma	CD19	Phase 1Phase 2	Recruiting	Jun-2016	Jun-2017	Jun-2021	0	0	Hebei Senlang Biotechnology	China	Senl_001
NCT02186860	ALL	CD19	Phase 1	Recruiting	Jul-2016	Oct-2021	Dec-2021	0	0	Affiliated Hospital to Academy of Military Medical Sciences	China	Chimeric Antigen Receptor (CAR)-Modified T Cell Therapy in Treating Patients With Acute Lymphoblastic Leukemia
NCT02663297	B-Cell Lymphoma	CD30	Phase 1	Recruiting	Jul-2016	Sep-2021	Sep-2036	0	0	UNC Lineberger Comprehensive Cancer Center	United States	Administration of T Lymphocytes for Prevention of Relapse of Lymphomas
NCT02839954	Liver|NSCLC|Pancreatic|Breast	MUC1	Phase 1Phase 2	Unknown	Jul-2016	Jul-2017	Jul-2018	0	0	PersonGen Biomedicine	China	anti-MUC1 CAR-pNK cells
NCT02844062	Glioblastoma	EGFR	Phase 1	Unknown	Jul-2016	Jul-2018	Jul-2019	0	0	Beijing Sanbo Brain Hospital|Marino Biotechnology Co., Ltd.	China	Pilot Study of Autologous Anti-EGFRvIII CAR T Cells in Recurrent Glioblastoma Multiforme
NCT02846584	B-Cell Lymphoma	CD19 CD20	Phase 2	Unknown	Jul-2016	Dec-2019	Dec-2019	0	0	Southwest Hospital, China	China	a Clinical Research of Sequential CAR-T Bridging HSCT in the Treatment of Relapse/Refractory B-cell Malignancies
NCT02851589	ALL|CLL|B-Cell Lymphoma	CD19	Phase 1Phase 2	Unknown	Jul-2016	Nov-2018	Nov-2019	0	0	PersonGen Biomedicine	China	PCAR019
NCT02915445	Breast	EpCAM	Phase 1	Recruiting	Jul-2016	Jul-2020	Jul-2022	0	0	Sichuan University	China	EpCAM CAR-T for Treatment of Nasopharyngeal Carcinoma and Breast Cancer
NCT02924753	B-Cell Lymphoma	CD19	Phase 1	Unknown	Jul-2016	Jul-2019	Dec-2019	0	0	Pregene Science and Technology Company, Ltd.	China	The Safety and Efficacy of CART-19 Cells in B-cell Acute Lymphoblastic Leukemia (B-ALL).
NCT02937844	B-Cell Lymphoma	CD19	Phase 1	Unknown	Jul-2016	Jul-2018	Jul-2019	0	0	Marino Biotechnology	China	Marino-CD19
NCT02959151	Liver	GPC3 Mesothelin CEA	Phase 1Phase 2	Unknown	Jul-2016	Jan-2018	Jul-2018	0	0	Shanghai GeneChem Co., Ltd.|Shanghai Cancer Hospital, China	China	A Study of Chimeric Antigen Receptor T Cells Combined With Interventional Therapy in Advanced Liver Malignancy
NCT02690545	B-Cell Lymphoma	CD30	Phase 1Phase 2	Recruiting	Aug-2016	Aug-2023	Aug-2038	0	0	UNC Lineberger Comprehensive Cancer Center	United States	Study of CD30 CAR for Relapsed/Refractory CD30+ HL and CD30+ NHL
NCT02746952	ALL	CD19	Phase 1	Completed	Aug-2016	Jul-2020	Jul-2020	0	0	Cellectis	France	UCART-19
NCT02774291	Solid Tumors	NY-ESO-1	Early Phase 1	Recruiting	Aug-2016	May-2020	May-2020	0	0	Gilead|Kite Pharma	United States	NY-ESO-1 T cell therapy
NCT02776813	B-Cell Lymphoma	CD20	Phase 1	Completed	Aug-2016	Feb-2020	Feb-2020	0	0	Cogent Biosciences	United States	ACTR-087
NCT02813252	B-Cell Lymphoma	CD19	LTFU	Active, not recruiting	Aug-2016	Sep-2032	Sep-2032	0	0	Bristol-Myers Squibb|Celgene|Juno	United States	JCAR015
NCT02862028	Solid Tumors	EGFR	Phase 1Phase 2	Unknown	Aug-2016	Mar-2018	Jul-2018	0	0	Shanghai International Medical Center	China	PD-1 Antibody Expressing CAR-T Cells for EGFR Family Member Positive Advanced Solid Tumor (Lung, Liver and Stomach)
NCT02873390	Solid Tumors	EGFR	Phase 1Phase 2	Unknown	Aug-2016	Mar-2018	Jul-2018	0	0	Ningbo Cancer Hospital	China	PD-1 Antibody Expressing CAR-T Cells for EGFR Family Member Positive Advanced Solid Tumor
NCT02906371	ALL	CD19	Phase 1	Active, not recruiting	Aug-2016	Mar-2020	Jun-2021	0	0	Novartis	United States	tisagenlecleucel-t
NCT02930967	Solid Tumors	PD-L1	Phase 1	Unknown	Aug-2016	Aug-2018	Aug-2019	0	0	Marino Biotechnology Co., Ltd.	China	Chimeric Switch Receptor Modified T Cells for Patients With PD-L1+ Recurrent or Metastatic Malignant Tumors
NCT02930993	Pancreatic|Ovarian|Mesothelioma|Breast	Mesothelin	Phase 1	Unknown	Aug-2016	Aug-2018	Aug-2019	0	0	Marino Biotechnology Co., Ltd.	China	Anti-mesothelin CAR T Cells for Patients With Recurrent or Metastatic Malignant Tumors
NCT02965157	B-Cell Lymphoma	CD20	Phase 1Phase 2	Unknown	Aug-2016	Jan-2018	Jan-2018	0	0	Beijing Biohealthcare	China	CART-20
NCT03047811	Solid Tumors	NY-ESO-1	Phase 1	Unknown	Aug-2016	Dec-2017	Dec-2017	0	0	Fudan University	China	The Study of Targeted NY-ESO-1 T Cell Receptor (TCR) Genetic Modified Autologous T Cells Treatment of Advanced Solid Tumors
NCT03101709	B-Cell Lymphoma	CD19	Phase 1	Unknown	Aug-2016	Jul-2018	Jul-2019	0	0	Pregene Science and Technology Company, Ltd.	China	The Safety and Efficacy of CART-19 Cells in Relapse and Refractory Patients With CD19+ B-cell Lymphoma
NCT03142646	ALL|CLL	CD19	Phase 1Phase 2	Unknown	Aug-2016	Jun-2018	Oct-2018	0	0	Immunochina Medical Science	China	IM19 CAR-T
NCT02869217	Solid Tumors	NY-ESO-1	Phase 1	Recruiting	Sep-2016	Jan-2021	Jan-2021	0	0	Takara Bio	Japan	mipetresgene autoleucel
NCT02892695	ALL|CLL|B-Cell Lymphoma	CD19	Phase 1Phase 2	Unknown	Sep-2016	Sep-2018	Sep-2019	0	0	PersonGen Biomedicine	China	PCAR119
NCT02903810	B-Cell Lymphoma	CD19 CD22	Phase 1Phase 2	Unknown	Sep-2016	Dec-2018	Dec-2019	0	0	Xuzhou Medical University	China	Combination Transfer of Î±CD19-TCRz-41BB and Î±CD22-TCRz-41BB CAR-T Cells for B-cell Hematologic Malignancy
NCT02919046	Neuroblastoma	GD2	Phase 1	Unknown	Sep-2016	Sep-2020	Sep-2020	0	0	Sinobioway Cell Therapy	China	Sinobioway-GD2
NCT02926833	B-Cell Lymphoma	CD19	Phase 1Phase 2	Completed	Sep-2016	Feb-2019	Aug-2033	0	0	Gilead|Kite Pharma	United States	axicabtagene ciloleucel
NCT03196414	Multiple Myeloma	BCMA	Phase 1Phase 2	Recruiting	Sep-2016	Sep-2026	Dec-2026	0	0	The First Affiliated Hospital of Soochow University	China	Study of CART-138/BCMA Therapy for R/R Multiple Myeloma
NCT02819583	ALL|CLL|B-Cell Lymphoma	CD19	Phase 1Phase 2	Unknown	Oct-2016	Sep-2018	Sep-2019	0	0	PersonGen Biomedicine	China	PCAR019
NCT02840110	B-Cell Lymphoma	CD20	LTFU	Enrolling by invitation	Oct-2016	Dec-2035	Dec-2035	0	0	Unum Therapeutics	United States	ACTR-087
NCT02933775	ALL|CLL|B-Cell Lymphoma	CD19	Phase 1	Unknown	Oct-2016	Apr-2018	Jan-2020	0	0	CARsgen Therapeutics	China	CSG-CD19
NCT02935153	ALL|B-Cell Lymphoma	CD22	Phase 1Phase 2	Recruiting	Oct-2016	Oct-2019	Oct-2020	0	0	Southwest Hospital, China	China	A Clinical Research of CD22-Targeted CAR-T in B Cell Malignancies
NCT02935543	ALL	CD19	Phase 2	Terminated	Oct-2016	Dec-2018	Dec-2018	0	0	Novartis	United States	tisagenlecleucel-t
NCT02937103	AML|CML	CD123	Phase 1Phase 2	Recruiting	Oct-2016	Oct-2019	Oct-2020	0	0	Southwest Hospital, China	China	A Clinical Research of CD123-Targeted CAR-T in Myeloid Malignancies
NCT02944162	AML	CD33	Phase 1Phase 2	Unknown	Oct-2016	Sep-2017	Sep-2018	0	0	PersonGen Biomedicine	China	anti-CD33 CAR-pNK cells
NCT02954445	ALL|B-Cell Lymphoma|Multiple Myeloma	BCMA	Phase 1Phase 2	Recruiting	Oct-2016	Oct-2019	Oct-2020	0	0	Southwest Hospital, China	China	A Clinical Research of BCMA-Targeted CAR-T in B Cell Malignancies
NCT02958384	Multiple Myeloma	LeY	Phase 1Phase 2	Unknown	Oct-2016	Oct-2019	Oct-2020	0	0	Southwest Hospital, China	China	A Clinical Research of LeY-Targeted CAR-T in Myeloid Malignancies
NCT02958397	AML|CML	CD33	Phase 1Phase 2	Recruiting	Oct-2016	Oct-2019	Oct-2020	0	0	Southwest Hospital, China	China	A Clinical Research of CD33-Targeted CAR-T in Myeloid Malignancies
NCT02958410	Leukaemia|Lymphoma	CD30	Phase 1Phase 2	Recruiting	Oct-2016	Oct-2019	Oct-2020	0	0	Southwest Hospital, China	China	A Clinical Research of CD30-Targeted CAR-T in Lymphocyte Malignancies
NCT02989064	Bladder|Melanoma|Head and Neck	MAGE-A10	Phase 1	Completed	Oct-2016	Dec-2019	Jun-2020	0	0	Adaptimmune	United Kingdom	Adaptimmune A10
NCT03110640	ALL|CLL|B-Cell Lymphoma	CD19	Phase 1	Recruiting	Oct-2016	Jun-2020	Sep-2021	0	0	First Affiliated Hospital of Wenzhou Medical Univeristy	China	Anti-CD19 CAR T Infusion Combined With Allogeneic Stem Cell Transplantation for B-cell Leukemia/Lymphoma
NCT02706405	B-Cell Lymphoma	CD19	Phase 1	Recruiting	Nov-2016	Dec-2021	Dec-2033	0	0	Bristol-Myers Squibb|Celgene|Juno	United States	JCAR-014
NCT02735083	B-Cell Lymphoma	CD19	Phase 1	Enrolling by invitation	Nov-2016	Mar-2040	Mar-2040	0	0	Cellectis	France	UCART-19
NCT02744287	Pancreas	PSCA	Phase 1Phase 2	Recruiting	Nov-2016	Oct-2022	Feb-2024	0	0	Bellicum Pharmaceuticals	United States	BPX-601
NCT02772198	ALL|B-Cell Lymphoma	CD19	Phase 1Phase 2	Recruiting	Nov-2016	Jul-2022	Nov-2022	0	0	Sheba Medical Center	Israel	T-cells Expressing Anti-CD19 CAR in Pediatric and Young Adults With B-cell Malignancies
NCT02789228	Solid Tumors	PRAME	Phase 1	Recruiting	Nov-2016	Sep-2020	Dec-2020	0	0	Children's Research Institute	United States	Expanded Multi-antigen Specific Lymphocytes
NCT02975687	ALL	CD19	Phase 1	Completed	Nov-2016	Dec-2018	Dec-2018	0	0	Institute of Hematology & Blood Diseases Hospital|Union Stem cell & gene engineering Co.LTD	China	CD19 CAR T Cells in Patients With Resistant or Refractory CD19+ Acute Lymphoblastic Leukemia
NCT03027739	ALL	CD19	Phase 2Phase 3	Unknown	Nov-2016	Dec-2019	Dec-2020	0	0	Fujian Medical University	China	Kymriah
NCT03265106	ALL|B-Cell Lymphoma	CD19	Phase 1Phase 2	Active, not recruiting	Nov-2016	May-2021	Dec-2021	0	0	Shenzhen BinDeBio	China	BinD-19
NCT03851146	Solid Tumors	CD28	Phase 1	Active, not recruiting	Nov-2016	Apr-2021	Dec-2024	0	0	Peter MacCallum Cancer Centre, Australia	Australia	A Study of Anti-Lewis Y Chimeric Antigen Receptor-T Cells (LeY-CAR-T) in Patients With Solid Tumours
NCT02210104	Melanoma	NY-ESO-1	Phase 1	Withdrawn	Dec-2016	Dec-2019	Dec-2019	0	0	Gilead|Kite Pharma	United States	NY-ESO-1 T cell therapy
NCT02973191	B-Cell Lymphoma	CD19	Phase 1Phase 2	Withdrawn	Dec-2016	Jun-2019	Jan-2021	0	0	Bristol-Myers Squibb|Celgene|Juno	United States	JCAR-015
NCT02976857	DLBCL	CD19	Phase 1	Completed	Dec-2016	Sep-2018	Jan-2019	0	0	Cellular Biomedicine Group	China	CAR-T CD19
NCT02992743	Liposarcoma	NY-ESO-1	Phase 2	Recruiting	Dec-2016	Oct-2021	Oct-2021	0	0	GlaxoSmithKline	United Kingdom	letetresgene-autoleucel
NCT02992834	B-Cell Lymphoma	CD19	Phase 1	Not yet recruiting	Dec-2016	Aug-2020	Jan-2022	0	0	The First People's Hospital of Changzhou	China	Anti-CD19:TCRÎ¶ Chimeric Antigen Receptor-T Cells in the Treatment for CD19+ B Cell Lymphoma
NCT03018405	AML|Multiple Myeloma	NKG2D	Phase 1Phase 2	Recruiting	Dec-2016	May-2021	Aug-2021	0	0	Celyad Oncology	Belgium	CYAD-01
NCT03060356	Melanoma|Breast	c-MET	Early Phase 1	Terminated	Dec-2016	Mar-2020	Mar-2020	0	0	University of Pennsylvania	United States	Autologous T Cells Expressing MET scFv CAR (RNA CART-cMET)
NCT03121625	B-Cell Lymphoma	CD19	Phase 1	Recruiting	Dec-2016	Dec-2018	Dec-2021	0	0	Hebei Senlang Biotechnology	China	Senl_001
NCT02775292	Solid Tumors	NY-ESO-1	Phase 1	Completed	Jan-2017	Apr-2019	Apr-2019	0	0	Jonsson Comprehensive Cancer Center|National Cancer Institute (NCI)	United States	NY-ESO-1 Reactive TCR
NCT02858310	Anal	HPV16-E7	Phase 1Phase 2	Recruiting	Jan-2017	Jan-2026	Jan-2026	0	0	Gilead|Kite Pharma	United States	KITE-439
NCT03013712	Solid Tumors	EpCAM	Phase 1Phase 2	Unknown	Jan-2017	Dec-2018	Dec-2020	0	0	First Affiliated Hospital of Chengdu Medical College	China	A Clinical Research of CAR T Cells Targeting EpCAM Positive Cancer
NCT03018093	ALL	CD19	Phase 1	Unknown	Jan-2017	Aug-2018	Nov-2018	0	0	Cellular Biomedicine Group	China	C-CAR-011
NCT02664363	Glioma	EGFR	Phase 1	Terminated	Feb-2017	Sep-2018	Sep-2019	0	0	Duke University	United States	EGFRvIII CAR T Cells for Newly-Diagnosed WHO Grade IV Malignant Glioma
NCT02850536	Liver|Pancreatic	CEA	Phase 1	Active, not recruiting	Feb-2017	Dec-2018	Feb-2021	0	0	Sorrento Therapeutics	United States	HITM-SURE
NCT03030001	Solid Tumors	Mesothelin	Phase 1Phase 2	Unknown	Feb-2017	Dec-2018	Feb-2019	0	0	Ningbo Cancer Hospital	China	PD-1 Antibody Expressing CAR T Cells for Mesothelin Positive Advanced Malignancies
NCT03070327	Multiple Myeloma	BCMA	Phase 1	Active, not recruiting	Feb-2017	Feb-2022	Feb-2022	0	0	Bristol-Myers Squibb|Celgene|Juno	United States	orvacabtagene autoleucel
NCT03093168	Multiple Myeloma	BCMA	Phase 1	Unknown	Feb-2017	Sep-2019	Feb-2020	0	0	Hrain Biotechnology Co.,Ltd.	China	BCMA Chimeric Antigen Receptor Expressing T Cells in Multiple Myeloma
NCT03029273	NSCLC	NY-ESO-1	Phase 1	Unknown	Mar-2017	Mar-2019	Mar-2019	0	0	Guangdong Xiangxue Precision Medical Technology Co., Ltd.	China	NY-ESO-1 TCR ï¼ˆTAEST16001ï¼‰for Patients With Advanced NSCLC
NCT03049449	B-Cell Lymphoma	CD30	Phase 1	Recruiting	Mar-2017	Jun-2021	Jun-2022	0	0	National Cancer Institute (NCI)|National Institutes of Health Clinical Center (CC)	United States	T Cells Expressing a Fully-Human Anti-CD30 Chimeric Antigen Receptor for Treating CD30-Expressing Lymphomas
NCT03054298	Solid Tumors	Mesothelin	Phase 1	Recruiting	Mar-2017	Mar-2021	Mar-2021	0	0	University of Pennsylvania	United States	CAR T Cells in Mesothelin Expressing Cancers
NCT03064269	ALL	CD19	Phase 1	Unknown	Mar-2017	Aug-2019	Feb-2020	0	0	Shanghai Unicar-Therapy Biomed	China	SUTB-CD19
NCT03085173	B-Cell Lymphoma	CD19	Phase 1	Recruiting	Mar-2017	Mar-2022	Mar-2022	0	0	Bristol-Myers Squibb|Celgene|Juno	United States	CD19/4-1BBL armored CAR T cell therapy
NCT03089203	Prostate	PSMA	Phase 1	Active, not recruiting	Mar-2017	Sep-2021	Sep-2021	0	0	Tmunity Therapeutics	United States	TmPSMA-01
NCT03114670	AML	CD123	Phase 1	Recruiting	Mar-2017	Mar-2019	Mar-2021	0	0	Affiliated Hospital to Academy of Military Medical Sciences	China	Donor-derived Anti-CD123-CART Cells for Recurred AML After Allo-HSCT
NCT03146234	Liver	GPC3	Early Phase 1	Completed	Mar-2017	Oct-2018	Oct-2018	0	0	CARsgen Therapeutics	China	KJgpc3-001
NCT03156101	AML	CD19	Phase 1Phase 2	Active, not recruiting	Mar-2017	May-2021	Dec-2021	0	0	Shenzhen BinDeBio	China	BinD-19
NCT03207178	B-Cell Lymphoma	CD19 CD20	Phase 1Phase 2	Unknown	Mar-2017	Feb-2019	Feb-2020	0	0	Shanghai Longyao Biotechnology Inc., Ltd.|Xuzhou Medical University|Shanghai Jiao Tong University School of Medicine	China	Sequential Infusion of Anti-CD19 and Anti-CD20 CAR-T Cells Against Relapsed and Refractory B-cell Lymphoma
NCT03383952	ALL|CLL|B-Cell Lymphoma	CD19	Phase 1	Recruiting	Mar-2017	Dec-2020	Dec-2025	0	0	Immune Cell Therapy	China	ICAR-19 CAR-T cells
NCT03383965	B-Cell Lymphoma	CD30	Phase 1	Recruiting	Mar-2017	Dec-2020	Dec-2025	0	0	Immune Cell Therapy	China	ICAR30 CAR-T cells
NCT02743611	AML|MDS|Melamoma	PRAME	Phase 1Phase 2	Completed	Apr-2017	Jul-2019	Jul-2020	0	0	Bellicum Pharmaceuticals	United States	BPX-701
NCT02830724	Solid Tumors	CD70	Phase 1Phase 2	Suspended	Apr-2017	Jan-2027	Jan-2028	0	0	National Cancer Institute (NCI)|National Institutes of Health Clinical Center (CC)	United States	Administering Peripheral Blood Lymphocytes Transduced With a CD70-Binding Chimeric Antigen Receptor to People With CD70 Expressing Cancers
NCT02893189	B-Cell Lymphoma	CD19	Phase 1	Active, not recruiting	Apr-2017	Dec-2019	Dec-2022	0	0	University College, London	United Kingdom	CAR19 Donor Lymphocytes for Relapsed CD19+ Malignancies Following Allogeneic Transplantation
NCT03081780	AML	NK	Phase 1	Active, not recruiting	Apr-2017	Jan-2021	Jan-2021	0	0	Masonic Cancer Center, University of Minnesota	United States	FT-1238
NCT03086954	B-Cell Lymphoma	CD19	Phase 1	Not yet recruiting	Apr-2017	Mar-2021	Mar-2021	0	0	Sinobioway Cell Therapy	China	CD19-targeted chimeric antigen receptor T-cells
NCT03097770	B-Cell Lymphoma	CD19 CD20	Phase 1Phase 2	Completed	Apr-2017	May-2019	Jan-2020	0	0	Chinese PLA General Hospital	China	Treatment of Relapsed and/or Chemotherapy Refractory B-cell Malignancy by Tandem CAR T Cells Targeting CD19 and CD20
NCT03118180	B-Cell Lymphoma	CD19	Phase 1Phase 2	Unknown	Apr-2017	Dec-2018	Dec-2020	0	0	Innovative Cellular Therapeutics	China	SDS-19CAR
NCT03123939	ALL	CD19	Phase 3	Completed	Apr-2017	Oct-2020	Oct-2020	Mar-2017	Oct-2017	Novartis	United States	tisagenlecleucel-t
NCT03130712	Liver	GPC3	Phase 1Phase 2	Unknown	Apr-2017	Mar-2018	Mar-2018	0	0	Shanghai GeneChem Co., Ltd.|Beijing 302 Hospital	China	A Study of GPC3-targeted T Cells by Intratumor Injection for Advanced HCC (GPC3-CART)
NCT03159585	Solid Tumors	NY-ESO-1	Phase 1	Completed	Apr-2017	Jun-2019	Jun-2019	0	0	Guangzhou Xiangxue Pharma	China	TAEST-16001
NCT03159819	Gastric	CLD18	Phase 1	Recruiting	Apr-2017	Dec-2019	Dec-2021	0	0	CARsgen Therapeutics	China	CT-041
NCT02917083	B-Cell Lymphoma	CD30	Phase 1	Recruiting	May-2017	Apr-2021	Feb-2036	0	0	Baylor College of Medicine|The Methodist Hospital System|Texas Children's Hospital	United States	CD30 CAR T Cells, Relapsed CD30 Expressing Lymphoma (RELY-30)
NCT03132792	Liver	AFP	Phase 1	Recruiting	May-2017	Jun-2021	Jun-2026	0	0	Adaptimmune	United Kingdom	alpha-fetoprotein, Adaptimmune
NCT03132922	Solid Tumors	MAGE-A4	Phase 1	Recruiting	May-2017	Sep-2032	Sep-2035	0	0	Adaptimmune	United Kingdom	Adaptimmune A4
NCT03139370	Solid Tumors	MAGE-A3+MAGE-A6	Phase 1	Recruiting	May-2017	May-2022	May-2037	0	0	Gilead|Kite Pharma	United States	KITE-718
NCT03146533	B-Cell Lymphoma	CD19	Phase 1Phase 2	Unknown	May-2017	Apr-2019	Oct-2019	0	0	Pregene Science and Technology Company, Ltd.	China	CD19 CART Cells for Patients With Relapse and Refractory CD19+ B-cell Lymphoma.
NCT03146637	Liver	MUC1	Phase 2	Recruiting	May-2017	Jan-2021	Jan-2021	0	0	Benhealth Biopharmaceutical	China	activated cytokine induced killer cells, Benhealth Biopharmaceutical
NCT03154775	B-Cell Lymphoma	CD19	Phase 1	Unknown	May-2017	Apr-2018	Dec-2018	0	0	Cellular Biomedicine Group	China	C-CAR-011
NCT03170141	Glioblastoma	EGFR	Phase 1	Enrolling by invitation	May-2017	Aug-2017	Dec-2020	0	0	Shenzhen Geno-Immune Medical Institute	China	4SCAR-IgT Against Glioblastoma Multiform
NCT03173417	ALL|CLL	CD19	Phase 1Phase 2	Completed	May-2017	May-2019	May-2019	0	0	Immunochina Pharmaceuticals	China	IM-19
NCT03175705	Liver	GPC3 NY-ESO-1 AFP	Phase 1	Unknown	May-2017	Dec-2018	Mar-2019	0	0	Beijing YouAn Hospital	China	Adoptive Transfer of Specific HCC Antigens CD8+ T Cells for Treating Patients With Relapsed/Advanced HCC
NCT03185468	Bladder	PSMA+FRa	Phase 1Phase 2	Recruiting	May-2017	Dec-2019	Dec-2020	0	0	Shenzhen Geno-Immune Medical Institute	China	Intervention of Bladder Cancer by CAR-T
NCT03287804	Multiple Myeloma	BCMA TACI	Phase 1Phase 2	Terminated	May-2017	Sep-2019	Sep-2019	0	0	Autolus	United Kingdom	AUTO-2
NCT02650986	Solid Tumors	NY-ESO-1	Phase 1Phase 2	Recruiting	Jun-2017	Jun-2021	Jun-2021	0	0	Gilead|Kite Pharma	United States	NY-ESO-1 T cell therapy
NCT02876510	Solid Tumors	COL6A3	Phase 1	Active, not recruiting	Jun-2017	Jun-2021	Dec-2021	0	0	Immatics US	United States	IMA-101
NCT03029338	B-Cell Lymphoma	CD19	Phase 1	Active, not recruiting	Jun-2017	May-2019	Apr-2021	0	0	Institute of Hematology & Blood Diseases Hospital|Union Stem cell & gene engineering Co.LTD	China	CD19 CAR T Cells in Patients With Relapsed or Refractory CD19 Positive B-cell Lymphoma
NCT03056339	B-Cell Lymphoma	CD19	Phase 1Phase 2	Recruiting	Jun-2017	Jun-2022	Jun-2022	0	0	M.D. Anderson Cancer Center|Takeda	United States	TAK-007
NCT03084380	Liver	GPC3	Phase 1Phase 2	Unknown	Jun-2017	May-2019	May-2020	0	0	Xinqiao Hospital of Chongqing	China	Anti-GPC3 CAR-T for Treating GPC3-positive Advanced Hepatocellular Carcinoma (HCC)
NCT03105336	B-Cell Lymphoma	CD19	Phase 2	Recruiting	Jun-2017	Feb-2022	Feb-2037	0	0	Gilead|Kite Pharma	United States	axicabtagene ciloleucel
NCT03144583	ALL|CLL|B-Cell Lymphoma	CD19	Phase 1	Active, not recruiting	Jun-2017	May-2021	May-2021	0	0	Instituto de Salud Carlos III	Spain	CART19-BE-01
NCT03152435	Colorectal	EGFR	Phase 1Phase 2	Unknown	Jun-2017	Sep-2019	Dec-2019	0	0	Pregene Science and Technology Company, Ltd.	China	EGFR CART Cells for Patients With Metastatic Colorectal Cancer
NCT03155191	ALL	CD19	Phase 1Phase 2	Recruiting	Jun-2017	Mar-2035	Mar-2035	0	0	Takara Bio	Japan	CD19-CAR T cell therapy, Takara Bio
NCT03166878	B-Cell Lymphoma	CD19	Phase 1Phase 2	Recruiting	Jun-2017	May-2022	May-2022	0	0	Chinese PLA General Hospital	China	A Study Evaluating UCART019 in Patients With Relapsed or Refractory CD19+ Leukemia and Lymphoma
NCT03179007	Solid Tumors	MUC1	Phase 1Phase 2	Unknown	Jun-2017	Jan-2019	Apr-2019	0	0	Shanghai Cell Therapy Research Institute	China	CTLA-4 and PD-1 Antibodies Expressing MUC1-CAR-T Cells for MUC1 Positive Advanced Solid Tumor
NCT03182803	Solid Tumors	Mesothelin	Phase 1Phase 2	Unknown	Jun-2017	Jan-2019	Apr-2019	0	0	Shanghai Cell Therapy Research Institute	China	CTLA-4 and PD-1 Antibodies Expressing Mesothelin-CAR-T Cells for Mesothelin Positive Advanced Solid Tumor
NCT03182816	Solid Tumors	EGFR	Phase 1Phase 2	Unknown	Jun-2017	Jan-2019	Apr-2019	0	0	Shanghai Cell Therapy Research Institute	China	CTLA-4 and PD-1 Antibodies Expressing EGFR-CAR-T Cells for EGFR Positive Advanced Solid Tumor
NCT03190278	AML	CD123	Phase 1	Recruiting	Jun-2017	Oct-2022	Oct-2022	0	0	Cellectis	France	UCART-123
NCT03191773	ALL|CLL|B-Cell Lymphoma	CD19	Phase 1Phase 2	Unknown	Jun-2017	Dec-2020	Dec-2020	0	0	Second Affiliated Hospital of Guangzhou Medical University|Shenzhen Institute for Innovation and Translational Medicine|Guangzhou First People's Hospital|First People's Hospital of Foshan|Dongguan People's Hospital|The First Affiliated Hospital of Guangdong Pharmaceutical University	China	A Study of Anti-CD19 CAR-T Cell Immunotherapy for Refractory /Relapsed B Cell Malignancies
NCT03196830	B-Cell Lymphoma	CD19+CD22	Phase 2	Recruiting	Jun-2017	May-2021	May-2021	0	0	Shanghai Unicar-Therapy Biomed	China	CAR-T cell therapy
NCT03203369	BPDCN	CD123	Phase 1	Terminated	Jun-2017	Jun-2019	Jun-2019	0	0	Cellectis	France	UCART-123
NCT03208556	B-Cell Lymphoma	CD19	Phase 1	Unknown	Jun-2017	Jun-2019	Jun-2020	0	0	Marino Biotechnology	China	Marino-iPD1 CD19
NCT03267173	Pancreatic	Mesothelin, PSCA, CEA, HER2, MUC1, EGFRvIII	Early Phase 1	Unknown	Jun-2017	Jun-2019	Jun-2019	0	0	Shanghai Unicar-Therapy Biomed	China	Evaluate the Safety and Efficacy of CAR-T in the Treatment of Pancreatic Cancer.
NCT03289455	ALL	CD19+CD22	Phase 1Phase 2	Completed	Jun-2017	May-2020	May-2020	0	0	Autolus	United Kingdom	AUTO-3
NCT03811457	DLBCL|ALL	CD19	Phase 1	Completed	Jun-2017	Dec-2018	Dec-2018	0	0	UWELL Biopharma	China	welgenaleucel
NCT03125577	B-Cell Lymphoma	CD19+CD123	Phase 1Phase 2	Recruiting	Jul-2017	Jul-2019	Dec-2021	0	0	Shenzhen Geno-Immune Medical Institute	China	Combination CAR-T Cell Therapy Targeting Hematological Malignancies
NCT03198052	Lung	MUC1+PD-L1+CD80+86	Phase 1	Recruiting	Jul-2017	Aug-2022	Aug-2023	0	0	Second Affiliated Hospital of Guangzhou Medical University|Hunan Zhaotai Yongren Medical Innovation Co. Ltd.|Guangdong Zhaotai InVivo Biomedicine Co. Ltd.|First Affiliated Hospital, Sun Yat-Sen University	China	PSCA/MUC1/PD-L1/CD80/86-CAR-T Cells Immunotherapy Against Cancers
NCT03198546	Solid Tumors	GPC3	Phase 1	Recruiting	Jul-2017	Aug-2022	Aug-2024	0	0	Second Affiliated Hospital of Guangzhou Medical University|Shenzhen Institute for Innovation and Translational Medicine|Guangzhou First People's Hospital|First People's Hospital of Foshan|Dongguan People's Hospital|The First Affiliated Hospital of Guangdong Pharmaceutical University	China	GPC3-T2-CAR-T Cells
NCT03222674	AML	MUC1 CD33 CD38 CD56 CD123	Phase 1Phase 2	Unknown	Jul-2017	Dec-2019	Dec-2020	0	0	Shenzhen Geno-Immune Medical Institute	China	Multi-CAR T Cell Therapy for Acute Myeloid Leukemia
NCT03240861	Solid Tumors	NY-ESO-1	Phase 1	Recruiting	Jul-2017	Sep-2021	Sep-2022	0	0	Gilead|Kite Pharma	United States	NY-ESO-1 T cell therapy
NCT03244306	ALL	CD22	Phase 1	Active, not recruiting	Jul-2017	Nov-2018	Jul-2035	0	0	Seattle Children's Hospital	United States	A Phase 1 Study of CD22 CAR T-Cell Immunotherapy for CD22+ Leukemia
NCT03269526	Pancreatic	EGFR	Phase 1Phase 2	Recruiting	Jul-2017	Mar-2021	Mar-2023	0	0	University of Virginia	United States	BATs Treatment for Pancreatic Cancer, Phase Ib/II
NCT03271632	Multiple Myeloma	BCMA+CD38+CD56+CD138	Phase 1Phase 2	Recruiting	Jul-2017	Dec-2019	Dec-2020	0	0	Shenzhen Geno-Immune Medical Institute	China	Multi-CAR T Cell Therapy in the Treatment of Multiple Myeloma
NCT03275493	ALL	CD19	Phase 1Phase 2	Unknown	Jul-2017	Sep-2019	Sep-2020	0	0	Shanghai Unicar-Therapy Biomed	China	SUTB-CD19
NCT02439788	Neuroblastoma	GD2	Phase 1	Withdrawn	Aug-2017	Sep-2019	Oct-2030	0	0	Baylor College of Medicine|Kuur|Alex's Lemonade Stand Foundation	United States	3RD GENERATION GD2 SPECIFIC CHIMERIC ANTIGEN RECEPTOR TRANSDUCED AUTOLOGOUS NATURAL KILLER T-CELLS FOR NEUROBLASTOMA
NCT03027128	Solid Tumors	CD16+IL-2	Phase 1	Completed	Aug-2017	Feb-2019	Feb-2019	0	0	NantKwest, Inc.	United States	high-affinity Natural Killer cells, NantKwest
NCT03126864	AML	CD33	Phase 1	Terminated	Aug-2017	Oct-2019	Oct-2019	0	0	Precigen, Inc.	United States	lentiviral CAR-T therapy
NCT03168438	Multiple Myeloma	NY-ESO-1	Phase 2	Recruiting	Aug-2017	Apr-2021	Jan-2023	0	0	GlaxoSmithKline	United Kingdom	letetresgene-autoleucel
NCT03185494	B-Cell Lymphoma	CD19 CD22	Phase 1Phase 2	Unknown	Aug-2017	Aug-2019	Aug-2020	0	0	Chinese PLA General Hospital	China	Treatment of Relapsed and/or Chemotherapy Refractory B-cell Malignancy by Tandem CAR T Cells Targeting CD19 and CD22
NCT03186118	ALL|CLL	CD19	Phase 1	Recruiting	Aug-2017	Mar-2021	Mar-2033	0	0	Seattle Children's Hospital	United States	Pilot Study of T-APCs Following CAR T Cell Immunotherapy for CD19+ Leukemia
NCT03262298	Leukaemia|B-Cell Lymphoma	CD22	Phase 1Phase 2	Recruiting	Aug-2017	Aug-2021	Aug-2022	0	0	Affiliated Hospital to Academy of Military Medical Sciences	China	Anti-CD22 CAR-T Cell Therapy Targeting B Cell Malignancies
NCT03263208	ALL	CD19	Phase 1Phase 2	Unknown	Aug-2017	Jan-2019	Jul-2019	0	0	Pregene Biotechnology Company, Ltd.	China	CD19 CAR-T Cells for Patients With Relapse and Refractory CD19+ B-ALL.
NCT03274219	Multiple Myeloma	BCMA	Phase 1	Active, not recruiting	Aug-2017	Oct-2025	Oct-2025	0	0	Bluebird Bio	United States	BB-21217
NCT03310008	Colorectal|Liver	NKG2D	Phase 1	Active, not recruiting	Aug-2017	May-2021	May-2021	0	0	Celyad Oncology	Belgium	CYAD-01
NCT03312205	B-Cell Lymphoma	CD19	Phase 1Phase 2	Recruiting	Aug-2017	Aug-2019	Aug-2023	0	0	Hebei Senlang Biotechnology	China	Senl_001
NCT03344705	ALL|CLL	CD19	Phase 1	Unknown	Aug-2017	Oct-2020	Dec-2020	0	0	Immunochina Medical Science	China	IM19 CAR-T
NCT04094766	ALL	CD19 CD22	Phase 1	Withdrawn	Aug-2017	Aug-2020	Aug-2020	0	0	Second Affiliated Hospital of Xi'an Jiaotong University|Nanjing Legend Biotech Co.	China	Safety and Efficacy of Dual Specificity CD19 and CD22 CAR-T Cell Immunotherapy in R/R Acute B Lymphoblastic Leukemia
NCT02935257	ALL	CD19	Phase 1	Recruiting	Sep-2017	Sep-2022	Nov-2032	0	0	Autolus	United Kingdom	AUTO-1
NCT03068416	B-Cell Lymphoma	CD19	Phase 2	Active, not recruiting	Sep-2017	Apr-2022	Apr-2022	0	0	Uppsala University|Uppsala University Hospital	Sweden	CD19-targeting, 3rd Generation CAR T Cells for Refractory B Cells Malignancy
NCT03068624	Melanoma	SLC45a2	Phase 1	Recruiting	Sep-2017	Sep-2021	Sep-2021	0	0	M.D. Anderson Cancer Center	United States	Study of Cellular Adoptive Immunotherapy Using Autologous CD8+ Antigen-Specific T Cells and Anti-CTLA4 for Patients With Metastatic Uveal Melanoma
NCT03190941	Solid Tumors	KRAS	Phase 1Phase 2	Suspended	Sep-2017	Jun-2027	Jun-2028	0	0	Gilead|Kite Pharma	United States	anti-KRAS G12V mTCR therapy
NCT03193567	NSCLC	NK	Phase 1	Recruiting	Sep-2017	May-2022	May-2022	0	0	Shanghai Houchao Biotechnology	China	high efficient killing cell therapy, Shanghai Houchao Biotechnology
NCT03198923	NSCLC	NK	Phase 1	Unknown	Sep-2017	Dec-2018	Dec-2020	0	0	Shanghai Houchao Biotechnology	China	0
NCT03233854	ALL|DLBCL	CD19+CD22	Phase 1	Recruiting	Sep-2017	Sep-2025	Sep-2035	0	0	Stanford University	United States	CD19/CD22 Chimeric Antigen Receptor T Cells and Chemotherapy in Treating Patients With Recurrent or Refractory CD19 Positive Diffuse Large B-Cell Lymphoma or B Acute Lymphoblastic Leukemia
NCT03250325	Synovial Sarcoma	NY-ESO-1	Phase 1Phase 2	Completed	Sep-2017	Jan-2020	Jan-2034	0	0	Takara Bio	Japan	mipetresgene autoleucel
NCT03258047	B Cell Lymphoma	CD19	Phase 2	Active, not recruiting	Sep-2017	Jan-2019	Jul-2019	0	0	First Affiliated Hospital of Zhejiang University	China	Novel Autologou CAR-T Therapy for Relapsed/Refractory B Cell Lymphoma
NCT03287817	DLBCL	CD19+CD22	Phase 1Phase 2	Recruiting	Sep-2017	Mar-2021	Mar-2021	0	0	Autolus	United Kingdom	AUTO-3
NCT03288493	Multiple Myeloma	BCMA	Phase 1Phase 2	Recruiting	Sep-2017	Dec-2021	Jun-2022	0	0	Poseida Therapeutics	United States	P-BCMA-101
NCT03291444	ALL|AML	CD10	Phase 1	Recruiting	Sep-2017	Mar-2021	Mar-2022	0	0	Shenzhen Geno-Immune Medical Institute	China	CAR-T Cells Combined With Peptide Specific Dendritic Cell in Relapsed/Refractory Leukemia/MDS
NCT03323944	Pancreas	Mesothelin	Phase 1	Recruiting	Sep-2017	Sep-2021	Sep-2021	0	0	University of Pennsylvania	United States	CAR T Cell Immunotherapy for Pancreatic Cancer
NCT03415399	B-Cell Lymphoma	CD19	Phase 1	Active, not recruiting	Sep-2017	Jun-2021	Jun-2021	0	0	Eureka Therapeutics	United States	ET-019003
NCT03614858	ALL	CD19+CD20	Phase 1Phase 2	Recruiting	Sep-2017	Dec-2020	Jan-2021	0	0	Shanghai Unicar-Therapy Biomed	China	SSCAR-010
NCT02602249	Gastric	MUC1 vaccine	Phase 1	Unknown	Oct-2017	Apr-2019	Apr-2020	0	0	Beijing Doing Biomedical Co.	China	MUC1-DC-CTL
NCT02656147	ALL|CLL|B-Cell Lymphoma	GD2	Phase 1	Unknown	Oct-2017	Apr-2019	Apr-2020	0	0	Beijing Doing Biomedical Co.	China	BDBMC-GD
NCT03019055	B-Cell Lymphoma|CLL|SLL	CD19+CD20	Phase 1	Completed	Oct-2017	Oct-2019	Oct-2022	0	0	Medical College of Wisconsin	United States	Study of CAR-20/19-T Cells in Patients With Relapsed Refractory B Cell
NCT03093350	Breast	MAGE-A4	Phase 2	Active, not recruiting	Oct-2017	May-2019	May-2024	0	0	Marker Therapeutics; Baylor College of Medicine|The Methodist Hospital System|Center for Cell and Gene Therapy, Baylor College of Medicine|National Cancer Institute (NCI)|Cancer Prevention Research Institute of Texas	United States	TAA Specific Cytotoxic T Lymphocytes in Patients With Breast Cancer
NCT03152526	AML	CD3 CD19 NK	Phase 2	Terminated	Oct-2017	Mar-2018	Mar-2018	0	0	Miltenyi Biomedicine	Germany	0
NCT03189836	B-Cell Lymphoma	CD20	Phase 1	Terminated	Oct-2017	Jan-2021	Mar-2021	0	0	Cogent Biosciences	United States	ACTR-707
NCT03213964	Epithelial Ovarian Cancer|Fallopian Tube Cancer|Primary Peritoneal Cancer	NK	Phase 1	Active, not recruiting	Oct-2017	Jan-2025	Jan-2025	0	0	Masonic Cancer Center, University of Minnesota	United States	Intraperitoneal Delivery of Adaptive Natural Killer (NK) Cells (FATE-NK100) With Intraperitoneal Int
NCT03241940	ALL	CD19+CD22	Phase 1	Recruiting	Oct-2017	Aug-2025	Aug-2035	0	0	Stanford University|National Cancer Institute (NCI)	United States	CD19/CD22 Chimeric Antigen Receptor T Cells and Chemotherapy in Treating Children or Young Adults With Recurrent or Refractory CD19 Positive B Acute Lymphoblastic Leukemia
NCT03242603	Neuroblastoma	GD2	Phase 1Phase 2	Unknown	Oct-2017	Aug-2019	Aug-2020	0	0	National University Hospital, Singapore	Singapore	Immunotherapy of Neuroblastoma Patients Using a Combination of Anti-GD2 and NK Cells
NCT03281551	ALL	CD19	Phase 1	Unknown	Oct-2017	Sep-2020	Nov-2020	0	0	Pinze Lifetechnology Co. Ltd.	China	PZ-01
NCT03318861	Multiple Myeloma	BCMA	Phase 1	Completed	Oct-2017	May-2019	Nov-2033	0	0	Gilead|Kite Pharma	United States	KITE-585
NCT03349255	Liver	AFP	Phase 1	Terminated	Oct-2017	Jan-2019	Jan-2019	0	0	Eureka Therapeutics	United States	ET 140202
NCT03370198	Colorectal|Liver	NKG2D	Phase 1	Completed	Oct-2017	Jan-2019	Dec-2020	0	0	Celyad Oncology	Belgium	CYAD-01
NCT03380039	Multiple Myeloma	BCMA	Phase 2	Completed	Oct-2017	Jul-2020	Jul-2023	0	0	CARsgen Therapeutics	China	BCMA-CAR-T cells
NCT03463928	ALL|CLL	CD19 CD22	Phase 1	Unknown	Oct-2017	Jun-2019	Dec-2019	0	0	Chinese PLA General Hospital	China	A Feasibility and Safety Study of Concomitant Therapy With Allo-CAR-T Cells and Allo-HSCT in Patients With Relapse or Refractory Leukemia
NCT03497819	Pancreas	Mesothelin	Early Phase 1	Unknown	Oct-2017	Oct-2019	Oct-2020	0	0	First Affiliated Hospital of Wenzhou Medical Univeristy	China	Autologous CARTmeso/19 Against Pancreatic Cancer
NCT03896854	AML	CD19	Phase 1Phase 2	Recruiting	Oct-2017	Jan-2020	Jan-2022	0	0	Shanghai Unicar-Therapy Bio-medicine Technology Co.,Ltd	China	CART-19 T Cell in CD19 Positive Relapsed or Refractory Acute Myeloid Leukemia (AML)
NCT04287660	Multiple Myeloma	BCMA	Phase 3	Recruiting	Oct-2017	Jan-2022	Jan-2024	0	0	The First Affiliated Hospital of Soochow University|Changshu Frist People's Hospital|Huai'an Second People's Hospital|Affiliated Hospital of Jiangnan University|Jiangsu Province Hospital of Traditional Chinese Medicine|Jiangyin People's Hospital|Jingjiang People's Hospital|The Third People's Hospital of Kunshan|Lianyungang Hospital Affiliated Bengbu Medical College|Suzhou Municipal Hospital|Zhang…	China	Study of BiRd Regimen Combined With BCMA CAR T-cell Therapy in Newly Diagnosed Multiple Myeloma (MM) Patients
NCT02770820	AML|CML|MDS	WT-1	Phase 1Phase 2	Active, not recruiting	Nov-2017	Jun-2020	Jun-2023	0	0	Bristol-Myers Squibb|Celgene|Juno	United States	JTCR-016
NCT03081910	T-Cell Lymphoma|T-Cell Leukemia	CD5+CD28	Phase 1	Recruiting	Nov-2017	Jul-2021	Jun-2036	0	0	Baylor College of Medicine|Center for Cell and Gene Therapy, Baylor College of Medicine|The Methodist Hospital System	United States	Autologous T-Cells Expressing a Second Generation CAR for Treatment of T-Cell Malignancies Expressing CD5 Antigen
NCT03103971	ALL|B-Cell Lymphoma	CD19	Phase 1	Recruiting	Nov-2017	Dec-2021	Dec-2022	0	0	Bristol-Myers Squibb|Celgene|Juno	United States	JCAR-014
NCT03298828	ALL|Burkitt Lymphoma	CD19	Phase 1	Not yet recruiting	Nov-2017	Oct-2020	Oct-2022	0	0	Third Military Medical University	China	CD19 CAR and PD-1 Knockout Engineered T Cells for CD19 Positive Malignant B-cell Derived Leukemia and Lymphoma
NCT03310619	ALL|CLL|B-Cell Lymphoma	CD19	Phase 1Phase 2	Recruiting	Nov-2017	Aug-2023	Aug-2023	0	0	Bristol-Myers Squibb|Celgene|Juno	United States	lisocabtagene maraleucel
NCT03330691	ALL|CLL|B-Cell Lymphoma	CD19+CD22	Phase 1	Recruiting	Nov-2017	Mar-2022	Nov-2034	0	0	Seattle Children's Hospital	United States	A Feasibility and Safety Study of Dual Specificity CD19 and CD22 CAR-T Cell Immunotherapy for CD19+CD22+ Leukemia and Lymphoma
NCT03330834	NSCLC	PD-L1	Phase 1	Terminated	Nov-2017	Apr-2020	Apr-2020	0	0	Guangzhou Yiyang Biological Technology Co., Ltd.	China	CAR-T Cell Immunotherapy for Advanced Lung Cancer
NCT03338972	Multiple Myeloma	BCMA	Phase 1	Recruiting	Nov-2017	Dec-2020	Dec-2022	0	0	Bristol-Myers Squibb|Celgene|Juno	United States	orvacabtagene autoleucel
NCT03344367	B-Cell Lymphoma	CD19	Phase 1	Active, not recruiting	Nov-2017	Oct-2019	Mar-2022	0	0	MingJu Therapeutics (Shanghai) Co., Ltd|Ruijin Hospital	China	Study Evaluating the Safety and Efficacy of JWCAR029 in Adult Subjects With Relapsed and Refractory B-cell Non-Hodgkin Lymphoma
NCT03353428	NSCLC	0	Phase 1Phase 2	Withdrawn	Nov-2017	Jan-2019	Dec-2020	0	0	Shenzhen Geno-Immune Medical Institute	China	Intervention of Engineered Immune Effector T Cells Against Lung Cancer
NCT03356795	Cervical	GD2	Phase 1Phase 2	Recruiting	Nov-2017	Jan-2019	Dec-2020	0	0	Shenzhen Geno-Immune Medical Institute	China	Intervention of CAR-T Against Cervical Cancer
NCT03362606	Ovarian Cancer	0	Phase 1Phase 2	Recruiting	Nov-2017	Jan-2019	Dec-2020	0	0	Shenzhen Geno-Immune Medical Institute	China	Engineered Immune Effectors Against Ovarian Cancer
NCT03362619	Cervical Cancer	0	Phase 1Phase 2	Recruiting	Nov-2017	Jan-2019	Dec-2020	0	0	Shenzhen Geno-Immune Medical Institute	China	Engineered Immune Effectors Against Cervical Cancer
NCT03391778	Neoplasms	NY-ESO-1	Phase 1	Recruiting	Nov-2017	Apr-2032	Apr-2032	0	0	GlaxoSmithKline	United Kingdom	letetresgene-autoleucel
NCT03017131	Fallopian Tube	NY-ESO-1	Phase 1	Completed	Dec-2017	Mar-2020	Mar-2032	0	0	Gilead|Kite Pharma	United States	NY-ESO-1 T cell therapy
NCT03098355	B-Cell Lymphoma	CD19 CD22	Phase 1Phase 2	Unknown	Dec-2017	Dec-2019	Dec-2019	0	0	Shenzhen Geno-Immune Medical Institute	China	Interleukin-2 Following 4SCAR19/22 T Cells Targeting Refractory and/or Recurrent B Cell Malignancies
NCT03272334	Breast	HER2	Phase 1Phase 2	Recruiting	Dec-2017	Mar-2021	Mar-2027	0	0	University of Virginia|Merck Sharp & Dohme Corp.	United States	Her2-BATS and Pembrolizumab in Metastatic Breast Cancer
NCT03277729	B-Cell Lymphoma	CD20	Phase 1Phase 2	Recruiting	Dec-2017	Nov-2022	Nov-2037	0	0	Mustang Bio	United States	MB-106
NCT03299738	B-Cell Lymphoma	CD19	Phase 1	Unknown	Dec-2017	Dec-2018	Aug-2019	0	0	Cellular Biomedicine Group	China	C-CAR-011
NCT03302403	Cancer, unspecified	CD19	Phase 1	Active, not recruiting	Dec-2017	Dec-2020	Dec-2023	0	0	CARsgen Therapeutics	China	BCMA-CAR-T cells
NCT03321123	B-Cell Lymphoma	CD19	Phase 2	Unknown	Dec-2017	Jul-2019	Dec-2019	0	0	Miltenyi Biotec GmbH	Germany	MB-CART19.1 in Patients With R/R ALL
NCT03322735	Multiple Myeloma	BCMA	Phase 1Phase 2	Unknown	Dec-2017	Oct-2018	Dec-2019	0	0	Pregene Biotechnology Company, Ltd.	China	BCMA CAR-T in Multiple Myeloma
NCT03331198	CLL|SLL	CD19	Phase 1Phase 2	Recruiting	Dec-2017	Oct-2021	Jul-2022	0	0	Bristol-Myers Squibb|Celgene|Juno	United States	lisocabtagene maraleucel
NCT03356782	Sarcoma	0	Phase 1Phase 2	Recruiting	Dec-2017	Nov-2023	Dec-2023	0	0	Shenzhen Geno-Immune Medical Institute	China	Safety and Efficacy Evaluation of 4th Generation Safety-engineered CAR T Cells Targeting Sarcomas
NCT03356808	Lung	GD2	Phase 1Phase 2	Recruiting	Dec-2017	Jan-2020	Dec-2020	0	0	Shenzhen Geno-Immune Medical Institute	China	Antigen-specific T Cells Against Lung Cancer
NCT03361748	Multiple Myeloma	BCMA	Phase 2	Active, not recruiting	Dec-2017	Nov-2024	Nov-2024	0	0	Bluebird Bio	United States	idecabtagene vicleucel
NCT03373071	B-Cell Lymphoma	CD19	Phase 1Phase 2	Recruiting	Dec-2017	Dec-2024	Dec-2027	0	0	Bambino Gesù Hospital and Research Institute	Italy	Anti-CD19 CAR T Cells in Pediatric Patients Affected by Relapsed/Refractory CD19+ ALL and NHL
NCT03375619	CLL|B-Cell Lymphoma	CD19 CD20	LTFU	Recruiting	Dec-2017	Aug-2021	Aug-2041	0	0	Medical College of Wisconsin	United States	Long-term Follow-up Study of Patients Receiving CAR-20/19-T Cells
NCT03383978	Bladder	HER2	Phase 1	Recruiting	Dec-2017	Sep-2022	Dec-2022	0	0	NantKwest	United States	HER2.taNK
NCT03389035	ALL	CD19	Phase 1Phase 2	Recruiting	Dec-2017	Dec-2020	Apr-2021	0	0	Fondazione Matilde Tettamanti Menotti De Marchi Onlus	Italy	CARCIK-CD19
NCT03391466	DLBCL	CD19	Phase 3	Active, not recruiting	Dec-2017	Jan-2022	Jan-2035	Apr-2017	Nov-2017	Gilead|Kite Pharma	United States	axicabtagene ciloleucel
NCT03393962	Ovarian Cancer	0	Phase 1Phase 2	Suspended	Dec-2017	Jan-2020	Dec-2020	0	0	Shenzhen Geno-Immune Medical Institute	China	Intervention of Ovarian Cancer With Antigen-specific Engineered Immune Effectors
NCT03888859	Liver	AFP	Early Phase 1	Completed	Dec-2017	Dec-2019	Jan-2020	0	0	Eureka Therapeutics	United States	ET 140202
NCT03895944	B-Cell lymphoma|ALL	CD19	Early Phase 1	Recruiting	Dec-2017	Dec-2019	Dec-2019	0	0	Eureka Therapeutics	United States	ET-019003
NCT03192462	Pancreas	MAGE-A4	Phase 1Phase 2	Active, not recruiting	Jan-2018	May-2021	Nov-2025	0	0	Marker Therapeutics; Baylor College of Medicine|Center for Cell and Gene Therapy, Baylor College of Medicine|The Methodist Hospital System|Pancreatic Cancer Action Network|The V Foundation for Cancer Research|Harris County Hospital District	United States	TAA Specific Cytotoxic T Lymphocytes in Patients With Pancreatic Cancer
NCT03197025	Vulvar	HPV16-E6 HPV18-E7	Phase 1	Terminated	Jan-2018	May-2019	Oct-2020	0	0	National Cancer Institute (NCI)|National Institutes of Health Clinical Center (CC)	United States	Immunotherapy With E6 T Cell Receptor (TCR) T Cells for Vulvar High-Grade Squamous Intraepithelial Lesions
NCT03294954	Neuroblastoma	GD2	Phase 1	Recruiting	Jan-2018	Sep-2021	Aug-2034	0	0	Baylor College of Medicine|Kuur	United States	GD2 Specific CAR and Interleukin-15 Expressing Autologous NKT Cells to Treat Children With Neuroblastoma
NCT03319459	Solid Tumors	EGFR	Phase 1	Active, not recruiting	Jan-2018	Oct-2021	Oct-2022	0	0	Fate Therapeutics	United States	FT-1238|FATE-NK100
NCT03355859	B-Cell Lymphoma	CD19	Phase 1	Active, not recruiting	Jan-2018	Dec-2019	Mar-2022	0	0	MingJu Therapeutics (Shanghai) Co., Ltd|Ruijin Hospital	China	Study Evaluating the Safety and Efficacy of JWCAR029 in Adult Subjects With Relapsed and Refractory B-cell Non-Hodgkin Lymphoma
NCT03373097	Neoroblastoma	GD2	Phase 1Phase 2	Recruiting	Jan-2018	Dec-2024	Dec-2027	0	0	Bambino Gesù Hospital and Research Institute	Italy	Anti-GD2 CAR T Cells in Pediatric Patients Affected by High Risk and/or Relapsed/Refractory Neuroblastoma
NCT03398967	ALL|CLL|B-Cell Lymphoma	CD19+CD20+CD22	Phase 1Phase 2	Recruiting	Jan-2018	May-2022	May-2022	0	0	Chinese PLA General Hospital	China	A Feasibility and Safety Study of Universal Dual Specificity CD19 and CD20 or CD22 CAR-T Cell Immunotherapy for Relapsed or Refractory Leukemia and Lymphoma
NCT03415100	Solid Tumors	NKG2D	Phase 1	Unknown	Jan-2018	Dec-2019	Dec-2019	0	0	The Third Affiliated Hospital of Guangzhou Medical University	China	Pilot Study of NKG2D-Ligand Targeted CAR-NK Cells in Patients With Metastatic Solid Tumours
NCT03468153	Lymphoma	CD19	Phase 1Phase 2	Unknown	Jan-2018	Jan-2019	Jan-2020	0	0	Shanghai Unicar-Therapy Biomed	China	SUTB-CD19
NCT04184414	ALL|Mantle Cell Lymphoma|Follicular Lymphoma	CD19	Early Phase 1	Recruiting	Jan-2018	Jan-2020	Jan-2020	0	0	PersonGen Biomedicine	China	CD19 CAR-T cell therapy
NCT03266692	Multiple Myeloma	CD20	Phase 1	Terminated	Feb-2018	Oct-2019	Oct-2019	0	0	Cogent Biosciences	United States	ACTR-087
NCT03326921	ALL	HA-1	Phase 1	Recruiting	Feb-2018	Oct-2024	Jul-2025	0	0	HighPassBio	United States	HA1-specific TCR therapy
NCT03391791	Solid Tumors	MAGE-A4 MAGE-A10	LTFU	Enrolling by invitation	Feb-2018	Jul-2018	Jul-2018	0	0	Adaptimmune	United Kingdom	AdaptImmunie-A4, A10
NCT03430011	Multiple Myeloma	BCMA	Phase 1Phase 2	Recruiting	Feb-2018	Jan-2022	Jun-2023	0	0	Bristol-Myers Squibb|Celgene|Juno	United States	orvacabtagene autoleucel
NCT03436771	B-Cell Lymphoma	BCMA CD19	LTFU	Terminated	Feb-2018	Jul-2018	Jul-2018	0	0	Bristol-Myers Squibb|Celgene|Juno	United States	JCAR017/JCARH125
NCT03448978	Multiple Myeloma	BCMA	Phase 1Phase 2	Recruiting	Feb-2018	Dec-2021	Dec-2022	0	0	Cartesian Therapeutics	United States	Descartes-08
NCT03455972	Multiple Myeloma	CD19+BCMA	Phase 1Phase 2	Recruiting	Feb-2018	Dec-2021	Dec-2023	0	0	The First Affiliated Hospital of Soochow University	China	T Cells Targeting CD19/BCMA (CART-19/BCMA)
NCT03525782	NSCLC	MUC1	Phase 1Phase 2	Recruiting	Feb-2018	Jan-2021	Jan-2022	0	0	Guangzhou Anjie Biomedical Tech	China	anti-MUC1 CAR-T cells
NCT04156243	B-Cell Lymphoma|ALL	CD19	Early Phase 1	Unknown	Feb-2018	Feb-2020	Feb-2020	0	0	iCell Gene Therapeutics|iCAR Bio Therapeutics Ltd	United States	CD19 CARvac T Cells for Patients With Relapsed / Refractory B Cell Malignancies
NCT03016377	ALL	CD19	Phase 1Phase 2	Recruiting	Mar-2018	Nov-2021	Oct-2036	0	0	Bellicum/UNC Lineberger Comprehensive Cancer Center	United States	Administration of Autologous CAR-T CD19 Antigen With Inducible Safety Switch in Patients With Relapsed/Refractory Acute Lymphoblastic Leukemia
NCT03209869	Neuroblastoma	GD2	Phase 1	Suspended	Mar-2018	Sep-2021	Sep-2021	0	0	University of Wisconsin	United States	Treatment of Relapsed or Refractory Neuroblastoma With Expanded Haploidentical NK Cells and Hu14.18-IL2
NCT03327285	ALL	CD19	Phase 1	Active, not recruiting	Mar-2018	Feb-2021	Apr-2021	0	0	Cellular Biomedicine Group	China	CAR-T CD19
NCT03344250	Glioblastoma	EGFR	Phase 1	Recruiting	Mar-2018	Mar-2021	Mar-2022	0	0	University of Virginia	United States	Phase I EGFR BATs in Newly Diagnosed Glioblastoma
NCT03393936	Kidney	ROR2	Phase 1Phase 2	Active, not recruiting	Mar-2018	Jan-2021	Mar-2035	0	0	Shanghai PerHum Therapeutics Co., Ltd.	China	CCT301-59
NCT03423992	Glioma	CD133	Phase 1	Recruiting	Mar-2018	Jan-2021	Jan-2021	0	0	Beijing Mario Biotech Company|Hebei Senlang BIotech Company	China	Personalized Chimeric Antigen Receptor T Cell Immunotherapy for Patients With Recurrent Malignant Gliomas
NCT03431311	Colorectal	TGFβII	Phase 1Phase 2	Terminated	Mar-2018	Jun-2019	Jun-2019	0	0	Oslo University Hospital	Norway	T Cell Receptor Based Therapy of Metastatic Colorectal Cancer
NCT03448393	B-Cell Lymphoma	CD19+CD22	Phase 1	Recruiting	Mar-2018	Dec-2021	Dec-2032	0	0	National Cancer Institute (NCI)|National Institutes of Health Clinical Center (CC)	United States	CD19/CD22 Chimeric Antigen Receptor (CAR) T Cells in Children and Young Adults With Recurrent or Refractory CD19/CD22-expressing B Cell Malignancies
NCT03473496	Multiple Myeloma	CD138+BCMA	Phase 1Phase 2	Recruiting	Mar-2018	Dec-2021	Dec-2022	0	0	Zhujiang Hospital	China	CAR-T Cells Therapy in Relapsed/Refractory Multiple Myeloma
NCT03483688	B-Cell Lymphoma	CD19	Phase 1	Completed	Mar-2018	Dec-2019	Jan-2020	0	0	Cellular Biomedicine Group	China	CAR-T CD19
NCT03484962	Liver	MUC1	Phase 2	Withdrawn	Mar-2018	May-2020	Aug-2020	0	0	Benhealth Biopharmaceutical	China	BenHealth - activated CIK and CD3-MUC1
NCT03501056	Lung	MUC1	Phase 2	Withdrawn	Mar-2018	May-2020	Jul-2020	0	0	Benhealth Biopharmaceutical	China	BenHealth - activated CIK and CD3-MUC1
NCT03503968	AML|MDS|B-Cell Lymphoma	PRAME	Phase 1Phase 2	Recruiting	Mar-2018	Aug-2020	Apr-2024	0	0	Medigene	Germany	MDG-1011
NCT03544021	ALL	CD19	Phase 1Phase 2	Unknown	Mar-2018	Mar-2019	Mar-2020	0	0	The Affiliated Hospital of the Chinese Academy of Military Medical Sciences	China	CART-19 FOR Relapsed/Refractory Acute Lymphoblastic Leukemia ï¼ˆALLï¼‰
NCT03545815	Solid Tumors	Mesothelin	Phase 1	Recruiting	Mar-2018	Oct-2020	Dec-2020	0	0	Chinese PLA General Hospital	China	Study of CRISPR-Cas9 Mediated PD-1 and TCR Gene-knocked Out Mesothelin-directed CAR-T Cells in Patients With Mesothelin Positive Multiple Solid Tumors.
NCT03556982	AML	CD123	Phase 1Phase 2	Unknown	Mar-2018	Mar-2019	Mar-2020	0	0	The Affiliated Hospital of the Chinese Academy of Military Medical Sciences	China	CART-123 FOR Relapsed/Refractory Acute Myelocytic Leukemiaï¼ˆAMLï¼‰
NCT03638206	Cancer, unspecified	CD22	Phase 1Phase 2	Recruiting	Mar-2018	Mar-2023	Mar-2023	0	0	Shenzhen BinDeBio	China	CAR-T/TCR-T cell immunotherapy
NCT03716856	Multiple Myeloma	BCMA	Phase 1	Completed	Mar-2018	Jun-2020	Jun-2023	0	0	CARsgen Therapeutics	China	BCMA-CAR-T cells
NCT03795779	AML|CML|MDS	CLL1+CD33	Early Phase 1	Recruiting	Mar-2018	Sep-2020	Sep-2020	0	0	iCell Gene Therapeutics	United States	ICG-144
NCT04156256	AML|CML|MDS	CD123 CD33	Early Phase 1	Unknown	Mar-2018	Sep-2020	Sep-2020	0	0	iCell Gene Therapeutics|Peking University Shenzhen Hospital|Chengdu Military General Hospital|iCAR Bio Therapeutics Ltd	China	CD123-CD33 cCAR in Patients With Relapsed and/or Refractory, High Risk Hematologic Malignancies
NCT04677088	Liver	HBV	Phase 1	Active, not recruiting	Mar-2018	Feb-2020	Dec-2021	0	0	Lion TCR Pte. Ltd.|First Affiliated Hospital, Sun Yat-Sen University	Singapore	TCR-Redirected T Cell Treatment in Patients With Recurrent HBV-related Hepatocellular Carcinoma Post Liver Transplantation
NCT03379493	B-Cell Lymphoma	CD19	Phase 1	Terminated	Apr-2018	Dec-2018	Jan-2019	0	0	Eureka Therapeutics	United States	ET-019003
NCT03464916	Multiple Myeloma	CD38	Phase 1	Recruiting	Apr-2018	Sep-2021	Feb-2022	0	0	Sorrento Therapeutics, Inc.	United States	CD38 CAR-T cell therapy
NCT03473457	AML	CD33+CD38+CD56+CD117+CD123+CD133+CD34+MUC1	Phase 1Phase 2	Recruiting	Apr-2018	Dec-2021	Dec-2022	0	0	Zhujiang Hospital	China	CAR-T Cells Therapy in Relapsed/Refractory Acute Myeloid Leukemia
NCT03488160	B-Cell Lymphoma	CD19	Early Phase 1	Unknown	Apr-2018	Apr-2019	Apr-2019	0	0	Sinobioway Cell Therapy	China	Sinobioway-CD19
NCT03509298	Pancreatic	MUC1	Phase 2	Withdrawn	Apr-2018	May-2020	Jul-2020	0	0	Benhealth Biopharmaceutical	China	BenHealth - activated CIK and CD3-MUC1
NCT03524274	Colorectal	MUC1	Phase 2	Withdrawn	Apr-2018	May-2020	Aug-2020	0	0	Benhealth Biopharmaceutical	China	BenHealth - activated CIK and CD3-MUC1
NCT03540199	Kidney	MUC1	Phase 2	Withdrawn	Apr-2018	May-2020	Sep-2020	0	0	Benhealth Biopharmaceutical	China	BenHealth - activated CIK and CD3-MUC1
NCT03540303	B-Cell Lymphoma	CD19	Phase 1	Unknown	Apr-2018	Apr-2020	Apr-2020	0	0	Pregene Biotechnology Company, Ltd.	China	Cytoplasmic Activated PD-1 CAR T Cells
NCT03554395	Gastric	CD3 MUC1	Phase 2	Withdrawn	Apr-2018	May-2020	Aug-2020	0	0	Fuda Cancer Hospital, Guangzhou|Benhealth Biopharmaceutical (Shenzhen) Co., Ltd.	China	Study of Activated Cytokine-induced Killer Armed With Bispecific Antibody for Advanced Gastric Cancer
NCT03559439	B-Cell Lymphoma	CD19	Phase 1	Recruiting	Apr-2018	Nov-2021	Dec-2021	0	0	Gracell Biotechnology Ltd.	China	CD19-targeting CAR T Cells in Relapsed or Refractory CD19 Positive B-cell Malignancies
NCT03576807	B-Cell Lymphoma	CD20	Phase 1	Unknown	Apr-2018	Apr-2019	Apr-2020	0	0	Shanghai Longyao Biotechnology Inc., Ltd.|Xuzhou Medical University|Shanghai Jiao Tong University School of Medicine	China	0
NCT03661554	Multiple Myeloma	BCMA	Early Phase 1	Unknown	Apr-2018	Oct-2018	Nov-2018	0	0	Pregene Biotechnology Company, Ltd.	China	BCMA Nano Antibody CAR-T Cells
NCT03664661	Multiple Myeloma	BCMA	Phase 1	Unknown	Apr-2018	Apr-2019	Apr-2020	0	0	Pregene Biotechnology Company, Ltd.	China	BCMA-CAR-T
NCT04044859	Synovial Sarcoma MRCLS Melanoma Urothelial Head and Neck Ovarian Gastric Esophagogastric Junction Disorder NSCLC Esophageal	MAGE-A4	Phase 1	Recruiting	Apr-2018	Jan-2021	Jan-2036	0	0	Adaptimmune	United Kingdom	Adaptimmune A4
NCT03283631	Glioblastoma	EGFR	Phase 1	Suspended	May-2018	Dec-2021	Dec-2022	0	0	National Cancer Institute (NCI)|Duke Cancer Institute|Duke University	United States	Intracerebral EGFR-vIII CAR-T Cells for Recurrent GBM
NCT03434769	NHL	CD19	Phase 1	Recruiting	May-2018	Apr-2021	Jul-2021	0	0	Case Comprehensive Cancer Center	United States	AntiCD19 Chimeric Antigen Receptor T Cells for Relapsed or Refractory Non Hodgkin Lymphoma
NCT03462316	Sarcoma	NY-ESO-1	Phase 1	Recruiting	May-2018	Jun-2021	Dec-2021	0	0	Guangdong Xiangxue Precision Medical Technology Co., Ltd.	China	NY-ESO-1-specific T Cell Receptor (TCR) T Cell in Sarcoma
NCT03467256	ALL	CD19	Phase 1Phase 2	Recruiting	May-2018	Mar-2023	Mar-2023	0	0	Federal Research Institute of Pediatric Hematology, Oncology and Immunology	Russian Federation	CD19 T-CAR for Treatment of Children and Young Adults With r/r B-ALL
NCT03502577	Multiple Myeloma	BCMA	Phase 1	Recruiting	May-2018	Jul-2021	Jul-2034	0	0	Fred Hutchinson Cancer Research Center|National Cancer Institute (NCI)	United States	BCMA-Specific CAR T-Cells Combined With a Gamma Secretase Inhibitor (LY3039478) to Treat Relapsed or Persistent Multiple Myeloma
NCT03528421	B-Cell Lymphoma	CD19	Phase 1	Unknown	May-2018	Apr-2020	May-2020	0	0	Immunochina Medical Science	China	IM19 CAR-T
NCT03542799	Gastric|Pancreatic	EGFR	Phase 1	Not yet recruiting	May-2018	May-2020	May-2021	0	0	Pregene Biotechnology Company, Ltd.	China	EGFR/IL12 CART-cell therapy
NCT03549442	Multiple Myeloma	BCMA CD19	Phase 1	Active, not recruiting	May-2018	May-2021	May-2036	0	0	University of Pennsylvania|Novartis	United States	Up-front CART-BCMA With or Without huCART19 in High-risk Multiple Myeloma
NCT04283006	B-Cell Lymphoma	CD20+CD22	Early Phase 1	Recruiting	May-2018	May-2023	May-2028	0	0	Yake Biotechnology Ltd.|Zhejiang University	China	A Study of CD20/CD22 Targeted CAR T-cell Therapy for Relapsed or Refractory Lymphoid Malignancies
NCT04303520	ALL	CD19+CD22	Phase 1	Recruiting	May-2018	Sep-2020	Feb-2021	0	0	The Second Affiliated Hospital of Henan University of Traditional Chinese Medicine|Hrain Biotechnology Co., Ltd.|First Affiliated Hospital of Wenzhou Medical University|Second Affiliated Hospital of Nanchang University	China	Anti-CD19/CD22 Bispecific CAR-T Cell Therapy for CD19-positive ALL
NCT03389230	Glioma	HER2	Phase 1	Recruiting	Jun-2018	Jun-2021	Jun-2021	0	0	Mustang Bio, Inc	United States	MB-103
NCT03484702	B-Cell Lymphoma	CD19	Phase 2	Recruiting	Jun-2018	Aug-2021	Jun-2023	0	0	Bristol-Myers Squibb|Celgene|Juno	United States	lisocabtagene maraleucel
NCT03515551	Solid Tumors	NY-ESO-1	Phase 1Phase 2	Recruiting	Jun-2018	Mar-2021	Apr-2021	0	0	Immunocore Ltd|GlaxoSmithKline	United Kingdom	IMCnyeso
NCT03548207	Multiple Myeloma	BCMA	Phase 1Phase 2	Active, not recruiting	Jun-2018	Feb-2022	Apr-2022	0	0	Janssen	United States	ciltacabtagene autoleucel
NCT03559764	Multiple Myeloma	BCMA	Early Phase 1	Unknown	Jun-2018	Feb-2020	May-2020	0	0	Allife Medical Science and Technology Co., Ltd.	China	Study of BCMA CAR-T in Multiple Myeloma
NCT03598179	ALL|B-Cell Lymphoma	CD19	Phase 2	Active, not recruiting	Jun-2018	Dec-2019	Jul-2020	0	0	The First Affiliated Hospital with Nanjing Medical University	China	XLCART001 Treatment in Relapsed/Refractory/High-risk B-cell Malignancy Subjects
NCT03685786	ALL|CLL	CD19	Phase 1	Recruiting	Jun-2018	Jun-2021	Sep-2021	0	0	Shenzhen Second People's Hospital	China	CART19 cell and auto-HSCT
NCT03767725	Multiple Myeloma	CD19	Phase 1	Recruiting	Jun-2018	Jun-2021	Sep-2021	0	0	Shenzhen Second People's Hospital	China	Anti-BCMA or/and Anti-CD19 CART Cells Treatment of Relapsed Multiple Myeloma
NCT04067414	DLBCL	CD19	Phase 1	Active, not recruiting	Jun-2018	Jul-2020	Dec-2020	0	0	Institute of Hematology & Blood Diseases Hospital|Shanghai Cell Therapy Engineering Technology Research Center Group Co., Ltd.	China	Exploratory Study of CD19-targeted Chimeric Antigen Receptor T Cells(BZ019) for Relapsed and Refractory B-cell Lymphoma
NCT03318900	Ovarian	CD8+IL-21	Phase 1	Recruiting	Jul-2018	Jul-2020	Jul-2020	0	0	Immatics US	United States	T Cell Immunotherapy for Advanced Ovarian Cancer
NCT03354390	Kidney	HERV-E	Phase 1	Recruiting	Jul-2018	Dec-2021	Dec-2021	0	0	National Heart, Lung, and Blood Institute (NHLBI)|Loyola University Medical Center (LUMC)|National Institutes of Health Clinical Center (CC)	United States	HERV-E TCR Transduced Autologous T Cells in People With Metastatic Clear Cell Renal Cell Carcinoma
NCT03483103	B-Cell Lymphoma	CD19	Phase 2	Active, not recruiting	Jul-2018	Dec-2022	Dec-2022	0	0	Bristol-Myers Squibb|Celgene|Juno	United States	lisocabtagene maraleucel
NCT03500991	CNS	HER2	Phase 1	Recruiting	Jul-2018	Jul-2021	Jul-2036	0	0	Seattle Children's Hospital	United States	HER2-specific CAR T Cell Locoregional Immunotherapy for HER2-positive Recurrent/Refractory Pediatric CNS Tumors
NCT03506802	Multiple Myeloma	NY-ESO-1	Phase 1	Withdrawn	Jul-2018	Jun-2019	Jun-2019	0	0	Gilead|Kite Pharma	United States	NY-ESO-1 T cell therapy
NCT03535246	Cancer	0	Phase 1Phase 2	Recruiting	Jul-2018	Jun-2021	Dec-2021	0	0	Shenzhen Geno-Immune Medical Institute	China	Tumor Associated Antigen-specific Immune Effector Cells
NCT03564977	B-Cell Lymphoma	CD19, CD20	Phase 1	Unknown	Jul-2018	Jun-2020	Jun-2020	0	0	Yake Biotechnology Ltd.	China	CD19-targeted CAR-T Cell Therapy for MRD+ B-cell Malignancies After Autologous Stem Cell Transplantation
NCT03573700	ALL	CD19	Phase 1Phase 2	Recruiting	Jul-2018	Jul-2023	Jul-2024	0	0	St. Jude Children's Research Hospital	United States	Evaluation of CD19-Specific CAR Engineered Autologous T-Cells for Treatment of Relapsed/Refractory CD19+ Acute Lymphoblastic Leukemia
NCT03574168	ALL	CD19	Phase 1	Unknown	Jul-2018	Dec-2019	Dec-2019	0	0	Bioceltech Therapeutics, Ltd.	China	CD19-CAR-T Cells in Patients With R/R B-ALL
NCT03585517	AML	CD123	Phase 1	Unknown	Jul-2018	Aug-2020	Nov-2020	0	0	Immunochina Medical Science	China	IM23CAR-T
NCT03594162	ALL	CD19	LTFU	No longer available	2018-07-01	2020-01-01	2020-01-01	0	0	Bellicum/UNC Lineberger Comprehensive Cancer Center	United States	ATLCAR.CD19
NCT03614650	Cancer	0	Phase 1Phase 2	Recruiting	Jul-2018	Jun-2021	Dec-2021	0	0	Shenzhen Geno-Immune Medical Institute	China	Immunotherapy Treating GI Cancer
NCT03633773	Intrahepatic Cholangiocarcinoma	MUC1	Phase 1Phase 2	Recruiting	Jul-2018	Aug-2023	Dec-2024	0	0	Second Affiliated Hospital, School of Medicine, Zhejiang University	China	MUC-1 CART
NCT03638193	Pancreatic	Mesothelin	Phase 2	Recruiting	Jul-2018	Feb-2022	Feb-2022	0	0	Shenzhen BinDeBio	China	CART-meso cells
NCT03672253	Multiple Myeloma	BCMA	Phase 1	Unknown	Jul-2018	Dec-2020	Dec-2020	0	0	Nanjing Legend Biotech	China	CAR-T Re-treatment
NCT03674463	Multiple Myeloma	BCMA	Phase 1	Unknown	Jul-2018	Dec-2020	Dec-2020	0	0	Nanjing Legend Biotech	China	LCAR-B4822M-02
NCT03232619	ALL	CD19	Phase 1Phase 2	Completed	Aug-2018	May-2020	Sep-2020	0	0	Shanghai Bioray Laboratory	China	CD19-CART
NCT03497533	B-Cell Lymphoma	CD19	Phase 1Phase 2	Recruiting	Aug-2018	Dec-2020	Dec-2020	0	0	Beike Biotechnology Co.	China	TI-1007
NCT03554889	Solid Tumors	EGFR	Phase 1	Unknown	Aug-2018	Mar-2019	Nov-2019	0	0	Hangzhou Cancer Hospital|Shanghai bokang bioengineering co., LTD	China	Immunotherapy of Advanced Cancer Using a Combination Nimotuzumab and NK Cells
NCT03563326	Gastric	0	Phase 1	Recruiting	Aug-2018	Dec-2019	Dec-2022	0	0	Sichuan University	China	Intraperitoneal Infusion of EpCAM CAR-T Cell in Advanced Gastric Cancer
NCT03590574	T-Cell Lymphoma	TRBC1	Phase 1Phase 2	Recruiting	Aug-2018	Jun-2022	Dec-2023	0	0	Autolus	United Kingdom	AUTO-4
NCT03605238	Neuromyelitis Optica	CD19 CD20	Phase 1	Withdrawn	Aug-2018	Aug-2019	Aug-2020	0	0	Chinese PLA General Hospital	China	Treatment of Relapsed and/or Refractory AQP4-IgG Seropositive NMOSD by Tandem CAR T Cells Targeting CD19 and CD20
NCT03608618	Ovarian|Fallopian Tube|Peritoneal	Mesothelin	Phase 1	Active, not recruiting	Aug-2018	Feb-2021	May-2022	0	0	MaxCyte	United States	MCY-M11
NCT03615313	Solid Tumors	Mesothelin	Phase 1Phase 2	Unknown	Aug-2018	Aug-2020	Dec-2020	0	0	Shanghai Cell Therapy Research Institute	China	PD-1 Antibody Expressing mesoCAR-T Cells
NCT03631576	AML	CD123+CLL1	Phase 2Phase 3	Recruiting	Aug-2018	Aug-2021	Aug-2021	0	0	Fujian Medical University	China	CD123/CLL1 CAR-T Cells for R/R AML
NCT03634683	Liver	HBV	Phase 1Phase 2	Not yet recruiting	Aug-2018	Aug-2022	Aug-2022	0	0	Lion TCR	Singapore	HBV antigen specific TCR redirected T cells
NCT03642496	B-Cell Lymphoma	CD19	Early Phase 1	Unknown	Aug-2018	Aug-2020	Sep-2020	0	0	Eureka Therapeutics	United States	ET019002-T Cell Therapy
NCT03696030	Brain|CNS	HER2	Phase 1	Recruiting	Aug-2018	Aug-2021	Aug-2021	0	0	Mustang Bio, Inc	United States	MB-104
NCT03854994	B-Cell Lymphoma|ALL	CD19	Phase 1	Recruiting	Aug-2018	Aug-2021	Aug-2022	0	0	Nanjing KAEDI Biotech	China	KD-019 2nd
NCT04156178	B-Cell Lymphoma|ALL	CD19 CD20	Early Phase 1	Unknown	Aug-2018	Sep-2020	Sep-2020	0	0	iCell Gene Therapeutics|iCAR Bio Therapeutics Ltd	United States	CD20-CD19 Compound CAR (cCAR) T Cells for Patients With Relapsed /Refractory B Cell Malignancies
NCT04156269	Multiple Myeloma	BCMA+CS1	Early Phase 1	Recruiting	Aug-2018	Sep-2021	Sep-2021	0	0	iCell Gene Therapeutics	United States	chimeric-antigen receptor B cell maturation antigen-CS1
NCT03392064	Lung	DLL3	Phase 1	Active, not recruiting	Sep-2018	Jan-2025	Jan-2025	0	0	Amgen	United States	AMG-119
NCT03399448	Myeloma|Melanoma|Sarcoma	NY-ESO-1	Phase 1	Terminated	Sep-2018	Feb-2020	Oct-2020	0	0	Tmunity Therapeutics	United States	NY-ESO-1 TCR therapy
NCT03412877	Solid Tumors	KRAS	Phase 2	Suspended	Sep-2018	Mar-2027	Mar-2028	0	0	National Cancer Institute (NCI)|National Institutes of Health Clinical Center (CC)	United States	TCR
NCT03450122	Synovial sarcoma|Liposarcoma	NY-ESO-1	Phase 1	Recruiting	Sep-2018	Jun-2021	Jun-2021	0	0	M.D. Anderson Cancer Center|Immune Design	United States	Study of Adoptive Immunotherapy Using Autologous CD8+ NY-ESO-1-Specific T Cells and the NY-ESO-1 Immunostimulatory Agents LV305 or CMB305 For Patients With Sarcoma
NCT03466320	AML	NKG2D	Phase 1Phase 2	Active, not recruiting	Sep-2018	Aug-2021	Aug-2021	0	0	Celyad Oncology	Belgium	CYAD-01
NCT03578406	Cervical|Head and Neck	HPV-E6	Phase 1	Recruiting	Sep-2018	Aug-2020	Aug-2021	0	0	Beijing TCRCure Biological	China	HPV E6-specific TCR-T cell therapy
NCT03602612	Multiple Myeloma	BCMA	Phase 1	Recruiting	Sep-2018	Jan-2023	Jan-2024	0	0	National Cancer Institute (NCI)	United States	Anti-BCMA CAR
NCT03620058	ALL	CD22	Phase 1	Active, not recruiting	Sep-2018	Jan-2036	Sep-2037	0	0	University of Pennsylvania|Novartis	United States	CART22 Alone or in Combination With huCART19 for ALL
NCT03649529	Melanoma	MHC-1	Early Phase 1	Recruiting	Sep-2018	Sep-2021	Jan-2022	0	0	Timmune Biotech Inc.	China	Treatment of Malignant Melanoma With GPA-TriMAR-T Cell Therapy
NCT03664635	NHL	CD20	Phase 1Phase 2	Recruiting	Sep-2018	Feb-2022	Nov-2022	0	0	Miltenyi Biomedicine	Germany	MB-CART20.1
NCT03671460	ALL	CD19	Phase 1	Unknown	Sep-2018	Jan-2020	Jan-2021	0	0	Tianjin Mycure Medical Technology	China	CD19 CAR-T Cells for Patients With Relapse and Refractory CD19+ B-ALL
NCT03682744	Solid Tumors	CEA	Phase 1	Active, not recruiting	Sep-2018	Dec-2020	Mar-2021	0	0	Sorrento Therapeutics	United States	K-171355 (intraperitoneal)
NCT03706326	Esophageal	MUC1	Phase 1Phase 2	Recruiting	Sep-2018	Sep-2021	Sep-2021	0	0	Guangzhou Anjie Biomedical Tech	China	anti-MUC1 CAR-T cells
NCT03575351	B-Cell Lymphoma	CD19	Phase 3	Recruiting	Oct-2018	Jan-2024	Jan-2024	Mar-2020	0	Bristol-Myers Squibb|Celgene|Juno	United States	lisocabtagene maraleucel
NCT03585764	Ovarian	0	Phase 1	Recruiting	Oct-2018	Oct-2024	Oct-2037	0	0	University of Pennsylvania	United States	MOv19-BBz CAR T Cells in aFR Expressing Recurrent High Grade Serous Ovarian Cancer
NCT03630159	DLBCL	CD19	Phase 1	Recruiting	Oct-2018	Nov-2023	Nov-2023	0	0	Novartis	United States	tisagenlecleucel-t
NCT03648697	Nasopharyngeal	EBV	Phase 2	Recruiting	Oct-2018	Oct-2021	Oct-2021	0	0	China Immunotech Co.	China	YT-E001
NCT03651128	Multiple Myeloma	BCMA	Phase 3	Recruiting	Oct-2018	May-2022	Nov-2025	Oct-2020	0	Bluebird Bio	United States	idecabtagene vicleucel
NCT03672305	Liver	PD-L1 c-MET	Early Phase 1	Unknown	Oct-2018	Oct-2019	Oct-2019	0	0	The Second Hospital of Nanjing Medical University	China	Clinical Study on the Efficacy and Safety of c-Met/PD-L1 CAR-T Cell Injection in the Treatment of HCC
NCT03706547	Multiple Myeloma	CD19 BCMA	Phase 1	Not yet recruiting	Oct-2018	Jul-2020	Dec-2021	0	0	Hrain Biotechnology	China	anti-CD19/BCMA CAR-T cell therapy
NCT03743246	B-Cell Lymphoma|ALL	CD19	Phase 1Phase 2	Recruiting	Oct-2018	Oct-2022	Oct-2022	0	0	Bristol-Myers Squibb|Celgene|Juno	United States	lisocabtagene maraleucel
NCT04650724	Multiple Myeloma	BCMA	Early Phase 1	Completed	Oct-2018	Dec-2018	Oct-2020	0	0	PersonGen BioTherapeutics	China	BCMA CAR-T cell therapy
NCT03568461	Follicular Lymphoma	CD19	Phase 2	Active, not recruiting	Nov-2018	Nov-2020	May-2022	0	0	Novartis	United States	tisagenlecleucel-t
NCT03624036	CLL	CD19	Phase 1	Recruiting	Nov-2018	Feb-2022	Feb-2037	0	0	Gilead|Kite Pharma	United States	brexucabtagene autoleucel
NCT03684889	ALL|B-Cell Lymphoma	CD19	Phase 1Phase 2	Active, not recruiting	Nov-2018	Dec-2021	Dec-2036	0	0	Seattle Children's Hospital	United States	CD19-specific CAR T Cells With a Fully Human Binding Domain
NCT03692429	Colorectal	NKG2D	Phase 1	Recruiting	Nov-2018	Nov-2021	Feb-2036	0	0	Celyad Oncology	Belgium	CYAD-101
NCT03704298	DLBCL	CD19	Phase 1Phase 2	Recruiting	Nov-2018	Feb-2022	Feb-2036	0	0	Gilead|Kite Pharma	United States	axicabtagene ciloleucel
NCT03720457	B-Cell Lymphoma	CD19	Phase 1	Recruiting	Nov-2018	Oct-2021	Oct-2023	0	0	Hrain Biotechnology Co.,Ltd.	China	human CD19 T cell therapy, HRAIN Biotechnology
NCT03720496	B-Cell Lymphoma	CD19	Phase 1	Recruiting	Nov-2018	Jun-2021	Dec-2021	0	0	Beike Biotechnology Co.	China	TI-1007
NCT03744676	B-Cell Lymphoma	CD19	Phase 2	Recruiting	Nov-2018	Oct-2023	Oct-2023	0	0	Bristol-Myers Squibb|Celgene|Juno	United States	lisocabtagene maraleucel
NCT03747965	Solid Tumors	PD-L1 Mesothelin	Phase 1	Unknown	Nov-2018	Nov-2019	May-2020	0	0	Chinese PLA General Hospital	China	Study of PD-1 Gene-knocked Out Mesothelin-directed CAR-T Cells With the Conditioning of PC in Mesothelin Positive Multiple Solid Tumors
NCT03754764	ALL	CD38+BCMA	Phase 1Phase 2	Recruiting	Nov-2018	Nov-2022	Nov-2022	0	0	Chinese PLA General Hospital	China	A Feasibility and Safety Study of CD38 CAR-T Cell Immunotherapy for Relapsed B-cell Acute Lymphoblastic Leukemia After CD19 CAR-T Adoptive Cellular Immunotherapy
NCT03778346	Multiple Myeloma	BCMA+Integrin+β7	Phase 1	Recruiting	Nov-2018	Jun-2022	Dec-2022	0	0	The Sixth Affiliated Hospital of Wenzhou Medical University	China	Integrin β7, BCMA, CS1, CD38 and CD138 as the Single or Compound Targets for the Fourth Genenation of CAR-T Cells
NCT03790072	AML	GD2	Phase 1	Suspended	Nov-2018	Jan-2021	Dec-2022	0	0	TC Biopharm	Czech Republic	OmnImmune
NCT03853616	B-Cell lymphoma|ALL|CLL	CD19+BCMA	Phase 1Phase 2	Recruiting	Nov-2018	Jul-2021	Jul-2022	0	0	Miltenyi Biomedicine	Germany	CD-19 CAR-T cell therapy
NCT02932956	Liver Cancer	GPC3	Phase 1	Recruiting	Dec-2018	Jan-2022	Feb-2037	0	0	Baylor College of Medicine|Center for Cell and Gene Therapy, Baylor College of Medicine|Cancer Prevention Research Institute of Texas|V Foundation|Cookies for Kids' Cancer|Curing Kids' Cancer Foundation	United States	Glypican 3-specific Chimeric Antigen Receptor Expressed in T Cells for Patients With Pediatric Solid Tumors (GAP)
NCT03247309	Solid Tumors	MAGE-A4+MAGE-A8	Phase 1	Recruiting	Dec-2018	Dec-2022	Dec-2024	0	0	Immatics US	United States	IMA-201
NCT03601078	Multiple Myeloma	BCMA	Phase 2	Recruiting	Dec-2018	Oct-2021	May-2026	0	0	Bluebird Bio	United States	idecabtagene vicleucel
NCT03602157	HL|T-Cell Lymphoma	CD30+CCR4	Phase 1	Recruiting	Dec-2018	Sep-2026	Sep-2041	0	0	UNC Lineberger Comprehensive Cancer Center	United States	CAR-T Cells Expressing CD30 and CCR4
NCT03612739	AML	NKG2D	Phase 1	Withdrawn	Dec-2018	May-2019	Aug-2021	0	0	Celyad Oncology	Belgium	CYAD-01
NCT03642626	ALL	CD19	Phase 2	Recruiting	Dec-2018	Jul-2028	Jul-2028	0	0	Masonic Cancer Center, University of Minnesota	United States	Kymriah/Yescarta
NCT03692663	Prostate	PSMA NK	Early Phase 1	Not yet recruiting	Dec-2018	Dec-2020	Dec-2021	0	0	Allife Medical Science	China	anti-PSMA CAR NK cell therapy
NCT03709706	Neoplasms	NY-ESO-1 LAGE-1a	Phase 2	Recruiting	Dec-2018	May-2025	May-2025	0	0	GlaxoSmithKline	United Kingdom	letetresgene-autoleucel
NCT03766126	AML	CD123	Phase 1	Active, not recruiting	Dec-2018	Dec-2021	Dec-2033	0	0	University of Pennsylvania	United States	Lentivirally Redirected CD123 Autologous T Cells in AML
NCT03767751	Multiple Myeloma	CD39	Phase 1Phase 2	Recruiting	Dec-2018	Dec-2022	Dec-2022	0	0	Chinese PLA General Hospital	China	A Feasibility and Safety Study of Dual Specificity CD38 and BCMA CAR-T Cell Immunotherapy for Relapsed or Refractory Multiple Myeloma
NCT03796390	AML	CD123	Phase 1	Recruiting	Dec-2018	Nov-2020	Jun-2021	0	0	Hebei Senlang Biotechnology	China	CD123 chimaeric antigen receptor therapy
NCT03999697	DLBCL|Follicular Lymphoma|Marginal Zone Lymphoma|Mantle Cell Lymphoma	CD22	Phase 1	Recruiting	Dec-2018	Dec-2020	Dec-2020	0	0	PersonGen Biomedicine	China	CD22 CAR T cell therapy
NCT03672318	Multiple Myeloma	CD138	Phase 1	Recruiting	Jan-2019	Nov-2020	Oct-2032	0	0	UNC Lineberger Comprehensive Cancer Center	United States	ATLCAR.CD138
NCT03691376	Ovarian Fallopian Peritoneal	NY-ESO-1	Phase 1	Recruiting	Jan-2019	Jan-2021	Jan-2022	0	0	Roswell Park Cancer Institute	United States	NY-ESO-1 TCR Engineered T Cell and HSC After Melphalan Conditioning Regimen in Treating Participants With Recurrent or Refractory Ovarian, Fallopian Tube, or Primary Peritoneal Cancer
NCT03751293	Multiple Myeloma	BCMA	Phase 1	Recruiting	Jan-2019	Oct-2019	Oct-2020	0	0	Cellular Biomedicine Group	China	anti BCMA CAR-T cell therapy
NCT03758417	Multiple Myeloma	BCMA	Phase 2	Active, not recruiting	Jan-2019	Nov-2022	Nov-2022	0	0	Legend Biotech|Janssen	China	ciltacabtagene autoleucel
NCT03761056	DLBCL	CD19	Phase 2	Active, not recruiting	Jan-2019	Jun-2021	Jun-2036	0	0	Gilead|Kite Pharma	United States	axicabtagene ciloleucel
NCT03790891	B-Cell Lymphoma	CD19	Early Phase 1	Recruiting	Jan-2019	Jun-2021	Jan-2022	0	0	Beike Biotechnology Co.	China	TI-1007
NCT03792633	ALL	CD19	Phase 2	Recruiting	Jan-2019	Aug-2021	Aug-2022	0	0	University of Pennsylvania	United States	Study of huCART19 for Very High-Risk (VHR) Subsets of Pediatric B-ALL
NCT03825718	ALL	CD19	Early Phase 1	Unknown	Jan-2019	Sep-2019	Sep-2019	0	0	Gracell Biotechnology Ltd.	China	A Study of GC007F CAR-T Cell Immunotherapy for Relapsed or Refractory B- ALL
NCT03825731	ALL	CD19	Early Phase 1	Unknown	Jan-2019	Sep-2019	Sep-2019	0	0	Gracell Biotechnology Ltd.	China	A Study of GC022 CAR-T Cell Immunotherapy for Relapsed or Refractory B- ALL
NCT03840317	ALL	CD19	Phase 1	Active, not recruiting	Jan-2019	Sep-2021	Jan-2022	0	0	Hebei Senlang Biotechnology	China	Senl_1904B
NCT03882840	Cancer, unspecified	MHC-1	Phase 1Phase 2	Recruiting	Jan-2019	Jan-2021	Jan-2022	0	0	Hunan Zhaotai Yongren Medical Innovation Co. Ltd.	China	Induced-T Cell Like NK Cellular Immunotherapy for Cancer Lack of MHC-I
NCT03891706	Solid Tumors	0	Phase 1	Recruiting	Jan-2019	Jul-2021	Dec-2021	0	0	Guangzhou FineImmune Biotech	China	FIT-001
NCT04336501	ALL	CD19	Phase 1	Recruiting	Jan-2019	Dec-2021	Dec-2021	0	0	Beijing Immunochina Medical Science & Technology Co., Ltd.	China	Efficacy and Safety Evaluation of IM19 CAR-T Cell Therapy for MRD+ After Transplantation
NCT03610724	NHL	CD19	Phase 2	Recruiting	Feb-2019	Mar-2022	Feb-2023	0	0	Novartis	United States	tisagenlecleucel-t
NCT03661424	Breast	HER2	Phase 1	Recruiting	Feb-2019	Apr-2021	Aug-2023	0	0	University of Virginia	United States	BATs in Patients With Breast Cancer and Leptomeningeal Metastases
NCT03697824	Neoplasms	NY-ESO-1	Phase 2	Withdrawn	Feb-2019	Jul-2022	Jul-2022	0	0	GlaxoSmithKline	United Kingdom	letetresgene-autoleucel
NCT03710421	Multiple Myeloma	CS1	Phase 1	Recruiting	Feb-2019	Dec-2021	Dec-2021	0	0	City of Hope Medical Center|National Cancer Institute (NCI)	United States	CS1-CAR T Therapy
NCT03711864	Multiple Myeloma	BCMA	Phase 1	Recruiting	Feb-2019	Oct-2021	Dec-2021	0	0	Immunochina Pharmaceuticals	China	IM-21
NCT03721068	Neuroblastoma	GD2	Phase 1	Recruiting	Feb-2019	Jun-2024	Jun-2039	0	0	UNC Lineberger Comprehensive Cancer Center	United States	CAR T-Cells Targeting the GD2
NCT03818165	Pancreatic	CEA	Phase 1	Active, not recruiting	Feb-2019	Feb-2021	Feb-2022	0	0	Sorrento Therapeutics	United States	K-171355 (intraperitoneal)
NCT03824951	B-Cell Lymphoma	CD19 NK	Early Phase 1	Unknown	Feb-2019	Jan-2020	Jan-2021	0	0	Allife Medical Science and Technology Co., Ltd.|Beijing Cancer Hospital	China	Study of Anti-CD19 iCAR NK Cells in Relapsed and Refractory B Cell Lymphoma
NCT03824964	B-Cell Lymphoma	CD19 CD22 NK	Early Phase 1	Unknown	Feb-2019	Jan-2020	Jan-2021	0	0	Allife Medical Science and Technology Co., Ltd.|Beijing Cancer Hospital	China	Study of Anti-CD19/CD22 CAR NK Cells in Relapsed and Refractory B Cell Lymphoma
NCT03870945	B-cell Lymphoma	CD19+CD20	Phase 1Phase 2	Active, not recruiting	Feb-2019	Dec-2020	Jul-2025	0	0	Miltenyi Biomedicine	Germany	MB-CART2019.1
NCT03881761	B-Cell Lymphoma	CD19+CD20	Phase 1	Recruiting	Feb-2019	Jan-2021	Jan-2022	0	0	Henan Hualong Biotechnology Company	China	CD19/20 Bispecific Nanobody-derived CAR-T Cells in B Cell Lymphoma
NCT03881774	B-Cell Lymphoma ALL	CD19	Phase 1	Recruiting	Feb-2019	Jan-2021	Jan-2022	0	0	Henan Hualong Biotechnology Company	China	Cord Blood Derived CAR-T Cells in Refractory/Relapsed B Cell Malignancies
NCT03932565	Solid Tumors	Nectin4+FAP	Phase 1	Recruiting	Feb-2019	Jun-2021	Dec-2021	0	0	The Sixth Affiliated Hospital of Wenzhou Medical University	China	Interventional Therapy Sequential With the Fourth-generation CAR-T Targeting Nectin4/FAP for Malignant Solid Tumors
NCT02905188	Liver	GPC3	Phase 1	Recruiting	Mar-2019	Dec-2021	Oct-2036	0	0	Baylor College of Medicine	United States	Glypican 3-specific Chimeric Antigen Receptor Expressing T Cells for Hepatocellular Carcinoma (GLYCAR)
NCT03638167	CNS	EGFR	Phase 1	Recruiting	Mar-2019	Mar-2022	Mar-2037	0	0	Seattle Children's Hospital	United States	EGFR806-specific CAR T Cell
NCT03666000	ALL|B-Cell Lymphoma	CD19	Phase 1Phase 2	Recruiting	Mar-2019	Oct-2021	Oct-2021	0	0	Precision Biosciences	United States	azercabtagene zapreleucel
NCT03680560	Solid Tumors	HER2	Phase 1	Terminated	Mar-2019	Mar-2020	Mar-2020	0	0	Cogent Biosciences	United States	ACTR-087
NCT03690310	B-Cell Lymphoma	CD19 NK	Early Phase 1	Not yet recruiting	Mar-2019	Nov-2020	Nov-2021	0	0	Allife Medical Science	China	anti-CD19 CAR NK cell therapy
NCT03692637	Ovarian	Mesothelin NK	Early Phase 1	Not yet recruiting	Mar-2019	Nov-2020	Nov-2021	0	0	Allife Medical Science	China	anti-mesothelin CAR NK cell therapy
NCT03692767	B-Cell Lymphoma	CD22 NK	Early Phase 1	Not yet recruiting	Mar-2019	Nov-2020	Nov-2021	0	0	Allife Medical Science	China	anti-CD22 CAR NK cell therapy
NCT03696784	B-Cell Lymphoma	CD19	Phase 1	Recruiting	Mar-2019	Oct-2023	Oct-2038	0	0	Bellicum/UNC Lineberger Comprehensive Cancer Center	United States	ATLCAR.CD19
NCT03726515	Glioblastoma	EGFR	Phase 1	Active, not recruiting	Mar-2019	Aug-2035	Dec-2035	0	0	University of Pennsylvania	United States	CART-EGFRvIII + Pembrolizumab in GBM
NCT03798509	ALL	CD19	Phase 1	Recruiting	Mar-2019	Jan-2022	Jan-2024	0	0	Hrain Biotechnology Co., Ltd.	China	human CD19 T cell therapy, HRAIN Biotechnology
NCT03874897	Solid Tumors	CLD18	Phase 1	Recruiting	Mar-2019	Mar-2021	Mar-2022	0	0	CARsgen Therapeutics	China	CT-041
NCT03893019	Melanoma	CD20	Early Phase 1	Recruiting	Mar-2019	Jul-2021	Jul-2021	0	0	Miltenyi Biomedicine	Germany	MB-CART20.1
NCT03910842	Non-Hodgkin Lymphoma Leukemia	CD19	Early Phase 1	Recruiting	Mar-2019	Apr-2022	Oct-2022	0	0	Timmune Biotech Inc.	China	Treatment of Children CD19+ Leukemia and Non-Hodgkin Lymphoma With CD19-TriCAR-T/SILK Cell Therapy
NCT03919526	ALL	CD19+CD22	Phase 1	Recruiting	Mar-2019	Dec-2020	Jun-2021	0	0	Shanghai General Hospital	China	Anti-CD19/CD22 Bispecific CAR-T Cell Therapy for MRD Positive ALL
NCT03929107	B-Cell Lymphoma	CD19	Phase 2	Recruiting	Mar-2019	Jan-2022	Apr-2022	0	0	First Affiliated Hospital of Zhejiang University	China	Interleukin-7 and Chemokine (C-C Motif) Ligand 19-expressing CD19-CAR-T for Refractory/Relapsed B Cell Lymphoma.
NCT03937544	ALL	CD19	Phase 2Phase 3	Recruiting	Mar-2019	Mar-2024	Mar-2024	0	0	Gaia Science	Malaysia	Intravenous Autologous CD19 CAR-T Cells for R/R B-ALL
NCT04139057	Head & Neck	EBV+PD1	Phase 1Phase 2	Recruiting	Mar-2019	Feb-2022	Feb-2022	0	0	Xinqiao Hospital of Chongqing|TCRCure Biopharma Ltd	China	EBV-Specific Anti-PD1 TCR-T Cells in the Treatment of EBV-Positive NHSCC
NCT04186052	Multiple Myeloma	BCMA	Early Phase 1	Recruiting	Mar-2019	Mar-2021	Mar-2021	0	0	PersonGen Biomedicine	China	BCMA-CAR-T cells
NCT02405221	Cervical	HPV16	Phase 1	Recruiting	Apr-2019	Apr-2022	Jan-2024	0	0	Sidney Kimmel Comprehensive Cancer Center at Johns Hopkins	United States	Safety and Feasibility of TA-CIN Vaccine in HPV16 Associated Cervical Cancer
NCT03635632	Neuroblastoma	C7R+GD2	Phase 1	Recruiting	Apr-2019	Jun-2022	Dec-2037	0	0	Baylor College of Medicine	United States	C7R-GD2.CART Cells for Patients With Relapsed or Refractory Neuroblastoma (GAIL-N)
NCT03672851	ALL|AML	CD123	Phase 1	Terminated	Apr-2019	Jul-2019	Jul-2019	0	0	Legend Biotech	China	anti-CD123 CAR-T cell therapy
NCT03799913	Ovarian	Mesothelin	Early Phase 1	Recruiting	Apr-2019	Oct-2021	Apr-2022	0	0	Hrain Biotechnology Co., Ltd.	China	MESO-CAR T Cells Therapy for Relapsed and Refractory Ovarian Cancer
NCT03815383	Multiple Myeloma	BCMA	Phase 1	Recruiting	Apr-2019	Jan-2021	Apr-2021	0	0	The First Affiliated Hospital with Nanjing Medical University	China	A Study of BCMA-directed CAR-T Cells Treatment in Subjects With r/r Multiple Myeloma
NCT03890198	Gastric Pancreatic	CLD18	Early Phase 1	Terminated	Apr-2019	Mar-2020	Mar-2020	0	0	Legend Biotech	China	LB-1904
NCT03899415	Liver	HBV	Phase 1	Recruiting	Apr-2019	Jun-2022	Jun-2024	0	0	Lion TCR Pte. Ltd.	Singapore	TCR-Redirected T Cells Therapy in Patient With HBV Related HCC
NCT03902197	ALL	CD19	Phase 2	Recruiting	Apr-2019	Dec-2021	Dec-2023	0	0	Xuanwu Hospital, Beijing	China	CD19 hsCAR-T for Refractory/Relapsed CD19+ B-ALL Patients
NCT03907527	Fallopian Ovarian Peritoneal	0	Phase 1	Recruiting	Apr-2019	Apr-2022	Apr-2026	0	0	Precigen, Inc.	United States	PRGN-3005
NCT03907852	Mesothelioma Cholangiocarcinoma Ovarian Non Small Cell Lung Cancer	Mesothelin	Phase 1Phase 2	Recruiting	Apr-2019	Jun-2021	Jan-2023	0	0	TCR2 Therapeutics	United States	gavocabtagene autoleucel
NCT03916679	Ovarian	MESO	Phase 1Phase 2	Recruiting	Apr-2019	Apr-2022	Apr-2023	0	0	Second Affiliated Hospital of Zhejiang University	China	MESO-CAR T Cells Therapy for Relapsed and Refractory Epithelial Ovarian Cancer
NCT04271644	Multiple Myeloma	BCMA	Phase 1Phase 2	Recruiting	Apr-2019	Dec-2022	Jul-2023	0	0	Chongqing Precision Biotech	China	BCMA CAR-T cells
NCT04700319	B-Cell Lymphoma ALL	CD19+CD20	Early Phase 1	Recruiting	Apr-2019	May-2021	Jun-2021	0	0	PersonGen BioTherapeutics	China	CD19/CD20 CAR-T cell therapy
NCT03441100	Solid Tumors	MAGE-A1	Phase 1	Recruiting	May-2019	Jun-2022	Jun-2024	0	0	Immatics US	United States	IMA-202
NCT03524261	Breast	MUC1	Phase 2	Withdrawn	May-2019	Apr-2020	Jul-2020	0	0	Benhealth Biopharmaceutical	China	BenHealth - activated CIK and CD3-MUC1
NCT03570892	B-Cell Lymphoma	CD19	Phase 3	Recruiting	May-2019	Dec-2025	Mar-2026	0	0	Novartis	United States	tisagenlecleucel-t
NCT03593109	B-Cell Lymphoma	CD19+CD22	Phase 1	Recruiting	May-2019	May-2021	May-2023	0	0	Nanjing Legend Biotech	China	CD19 and CD22 CAR-T Cell Immunotherapy
NCT03599375	ALL	CD19 CD20	Phase 1	Not yet recruiting	May-2019	Dec-2020	Dec-2021	0	0	First Hospital of Jilin University	China	Immunotherapy With CD19 CART-cells for B Cell Acute Lymphoblastic Leukemia
NCT03686124	Solid Tumors	Non-identified+antigen	Phase 1	Recruiting	May-2019	Sep-2022	Jan-2024	0	0	Immatics US	United States	IMA-203
NCT03745326	Gastric|Pancreatic|Colorectal	KRAS	Phase 1Phase 2	Suspended	May-2019	Dec-2027	Dec-2028	0	0	Gilead|Kite Pharma	United States	anti-KRAS G12D mTCR therapy
NCT03873805	Prostate	PSCA	Phase 1	Recruiting	May-2019	Feb-2021	Feb-2021	0	0	Mustang Bio	United States	MB-105
NCT03927261	MDS AML	CD33	Phase 1	Recruiting	May-2019	May-2022	May-2025	0	0	Precigen, Inc.	United States	PRGN-3006
NCT03931720	Solid Tumors	ROBO1	Phase 1Phase 2	Recruiting	May-2019	May-2021	May-2022	0	0	Asclepius Technology Company	China	ROBO-1 BiCAR-NK/T cell therapy
NCT03932955	B-Cell Lymphoma	CD19	Phase 1	Recruiting	May-2019	May-2021	May-2021	0	0	Peking University	China	MC-19PD1 CAR-T in Relapsed or Refractory B Cell Lymphoma
NCT03939026	DLBCL Follicular Lymphoma	CD19	Phase 1	Recruiting	May-2019	Oct-2021	Oct-2021	0	0	Allogene Therapeutics	United States	ALLO-501
NCT03940820	Solid Tumor	ROBO1	Phase 1Phase 2	Recruiting	May-2019	May-2021	May-2022	0	0	Asclepius Technology Company	China	ROBO1 CAR-NK cell therapy
NCT03940833	Multiple Myeloma	BCMA	Phase 1Phase 2	Recruiting	May-2019	May-2021	May-2022	0	0	Asclepius Technology Company	China	BCMA CAR-NK 92 cell therapy
NCT03941457	Pancreatic	ROBO1	Phase 1Phase 2	Recruiting	May-2019	May-2021	May-2022	0	0	Asclepius Technology Company	China	ROBO1 CAR-NK cell therapy
NCT03960060	Gastric Pancreatic Bladder	ROR2	Phase 1	Active, not recruiting	May-2019	Feb-2021	Jun-2023	0	0	Shanghai PerHum Therapeutics Co., Ltd.	China	CCT301-59
NCT03965546	Liver	AFP	Early Phase 1	Recruiting	May-2019	Jun-2021	Jun-2022	0	0	Eureka Therapeutics	United States	ET 140202
NCT03973333	NSCLC Esophageal Gastric Head and Neck Urothelial	MAGE-A4	Phase 1Phase 2	Recruiting	May-2019	Oct-2021	Apr-2023	0	0	Immunocore Ltd	United Kingdom	IMC-C103C
NCT03993743	Liver	CD147	Phase 1	Recruiting	May-2019	Oct-2020	May-2022	0	0	Xijing Hospital	China	A Study of CD147-targeted CAR-T by Hepatic Artery Infusions for Very Advanced Hepatocellular Carcinoma
NCT03998033	Liver	AFP	Phase 1Phase 2	Active, not recruiting	May-2019	Jan-2021	Oct-2022	0	0	Eureka Therapeutics	United States	ET 140202
NCT04008251	ALL B-Cell Lymphoma	CD19	Phase 1	Recruiting	May-2019	Jul-2022	Dec-2022	0	0	Wuhan Sian Medical Technology Co., Ltd	China	Humanized CD19 Chimeric Antigen Receptor (CAR)-Modified T Cell Therapy in Treating Patients With B-cell Malignancies
NCT04012879	ALL	CD19	Phase 1	Recruiting	May-2019	Apr-2021	Jun-2021	0	0	Chinese PLA General Hospital|Shenzhen University General Hospital	China	Study Evaluating the Efficacy and Safety With CD19CAR-T for Relapsed or Refractory Acute Lymphoblastic Leukemia
NCT04012892	B-Cell Lymphoma	CD19	Phase 1	Recruiting	May-2019	Apr-2021	Jun-2021	0	0	Chinese PLA General Hospital|Shenzhen University|Shenzhen University General Hospital	China	Study Evaluating the Efficacy and Safety With CD19CAR-T for Relapsed or Refractory Non-Hodgkin Lymphoma
NCT04036019	B-Cell Lymphoma	CD20	Phase 1	Recruiting	May-2019	May-2021	Jul-2021	0	0	Cellular Biomedicine Group	China	CAR-T CD20
NCT04045847	Glioblastoma	CD147	Early Phase 1	Recruiting	May-2019	Oct-2020	May-2022	0	0	Xijing Hospital	China	CD147-CART Cells in Patients With Recurrent Malignant Glioma.
NCT04076137	Solid Tumors	CD3	Early Phase 1	Recruiting	May-2019	May-2020	May-2021	0	0	Benhealth Biopharmaceutical (Shenzhen) Co., Ltd.|Shenzhen Second People's Hospital	China	Targeted T-cell Therapy in Solid Tumors
NCT04237428	B-Cell Lymphoma	CD19	Phase 1	Recruiting	May-2019	Jun-2019	May-2021	0	0	PersonGen BioTherapeutics (Suzhou) Co., Ltd.|The First Affiliated Hospital of Zhengzhou University	China	CD19-CART in the Treatment of R/R CD19 Positive Non-Hodgkin's Lymphoma
NCT03229876	B-Cell Lymphoma	CD19	Phase 2	Recruiting	Jun-2019	Dec-2021	Dec-2022	0	0	Shanghai Bioray Laboratory	China	CD19-CART
NCT03618381	Solid Tumors	EGFR+CD19	Phase 1	Recruiting	Jun-2019	Jun-2021	Jun-2036	0	0	Seattle Children's Hospital/Carina iotech	United States	EGFR806 CAR T Cell Immunotherapy
NCT03829540	T-Cell Lymphoma T-Cell Leukemia	CD4	Phase 1	Recruiting	Jun-2019	Dec-2022	Dec-2037	0	0	iCell Gene Therapeutics	United States	multiple myeloma CAR-T cell therapy
NCT03912831	Solid tumors	HPV16	Phase 1	Recruiting	Jun-2019	May-2022	May-2037	0	0	Gilead|Kite Pharma	United States	KITE-439
NCT03933735	Multiple Myeloma	BCMA+CD3	Phase 1	Recruiting	Jun-2019	Dec-2021	Dec-2021	0	0	Teneobio, Inc.	United States	TNB-383B
NCT03958656	Multiple Myeloma	SLAMF7	Phase 1	Completed	Jun-2019	Jan-2021	Jan-2021	0	0	National Cancer Institute (NCI)	China	T-cells Expressing an Anti-SLAMF7 CAR for Treating Multiple Myeloma
NCT03960840	CLL	CD19	Phase 1	Recruiting	Jun-2019	Mar-2024	Mar-2024	0	0	Novartis	United States	YTB-323
NCT03975907	Multiple Myeloma	BCMA	Phase 1Phase 2	Recruiting	Jun-2019	Dec-2022	Dec-2022	0	0	CARsgen Therapeutics	China	BCMA-CAR-T cells
NCT04014894	B-Cell Lymphoma|ALL|CLL	CD19	Phase 1	Recruiting	Jun-2019	Jul-2021	Jul-2022	0	0	Eureka Therapeutics	United States	ET-019003
NCT04089215	NHL|DLBCL|Follicular Lymphoma	CD19	Phase 2	Recruiting	Jun-2019	Dec-2022	Sep-2024	0	0	JW Therapeutics	China	relmacabtagene autoleucel
NCT04271410	DLBCL	CD19	Phase 1Phase 2	Recruiting	Jun-2019	Dec-2021	Jul-2022	0	0	Chongqing Precision Biotech	China	pCAR-19B cells
NCT03747484	Merkel cell	0	Phase 1Phase 2	Recruiting	Jul-2019	Oct-2023	Oct-2023	0	0	Bluebird Bio	United States	FH-MCVA2TCR
NCT03879382	POMES Syndrome	CD19+BCMA	Phase 1	Recruiting	Jul-2019	Sep-2021	Feb-2022	0	0	Hrain Biotechnology	China	anti-CD19/BCMA CAR-T cell therapy
NCT03931421	Multiple Myeloma	BCMA	Phase 2	Recruiting	Jul-2019	Nov-2022	Dec-2022	0	0	First Affiliated Hospital of Zhejiang University	China	B Cell Maturation Antigenï¼ˆBMCAï¼‰-Targeted CAR-T for Refractory/Relapsed Multiple Myeloma
NCT03943472	Multiple Myeloma	BCMA	Early Phase 1	Not yet recruiting	Jul-2019	Nov-2021	May-2022	0	0	Hrain Biotechnology	China	BCMA targeted CAR T cell therapy
NCT03953599	B-Cell Lymphoma B-Cell Leukemia	CD19	Phase 1	Recruiting	Jul-2019	Jul-2021	Dec-2021	0	0	China Immunotech Co.	China	YT-19
NCT03970382	Solid Tumors	neoE	Phase 1	Recruiting	Jul-2019	Dec-2022	Dec-2024	0	0	PACT Pharma	United States	NeoTCR-P1 adoptive cell therapy
NCT03980288	Liver	GPC3	Phase 1	Recruiting	Jul-2019	Jun-2021	Jun-2022	0	0	CARsgen Therapeutics	China	CT-0180
NCT04003168	Multiple Myeloma	BCMA	Phase 1	Not yet recruiting	Jul-2019	Jul-2022	Jul-2024	0	0	Hrain Biotechnology	China	BCMA targeted CAR T cell therapy
NCT04008394	T-Cell Lymphoma T-Cell Leukaemia NK/T-cell Lymphoma Peripheral T Cell Lymphoma HL	CD30	Phase 1	Recruiting	Jul-2019	Jul-2022	Jan-2023	0	0	Wuhan Bio-Raid Biotechnology	China	CD30 chimaeric antigen receptor therapy
NCT04011293	B-Cell Lymphoma ALL	CD19	Early Phase 1	Recruiting	Jul-2019	Jul-2020	Apr-2022	0	0	Shandong University|Juventas Cell Therapy Ltd.	China	A Clinical Study of Anti-CD19 Chimeric Antigen Receptor T-Cell Injection (CNCT19) in the Treatment of Cluster of Differentiation 19 (CD19) Positive Relapsed or Refractory B Cell Malignancies
NCT04014881	AML	CD123	Phase 1	Recruiting	Jul-2019	Jul-2021	Jul-2022	0	0	Wuhan Bio-Raid Biotechnology	China	CD123 chimaeric antigen receptor therapy
NCT04016129	ALL	CD19	Phase 1Phase 2	Recruiting	Jul-2019	Jul-2021	Dec-2023	0	0	Shenzhen Geno-Immune Medical Institute	China	CAR-T Immunotherapy Targeting CD19- ALL
NCT04032847	NSCLC	Neoantigen	Phase 1Phase 2	Recruiting	Jul-2019	Jul-2023	Dec-2023	0	0	Achilles Therapeutics	United Kingdom	ATL-001
NCT04035434	B-Cell Lymphoma B-Cell Leukemia	CD19	Phase 1	Recruiting	Jul-2019	Jul-2026	Aug-2026	0	0	CRISPR Therapeutics	United States	CTX-110
NCT04044768	Synovial Sarcoma|Myxoid Liposarcoma	MAGE-A4	Phase 2	Recruiting	Jul-2019	Jan-2022	Nov-2034	0	0	Adaptimmune	United Kingdom	Adaptimmune A4
NCT04044950	Oropharyngeal	HPV16-E7	Phase 2	Withdrawn	Jul-2019	Sep-2020	Sep-2020	0	0	National Cancer Institute (NCI)|National Institutes of Health Clinical Center (CC)	United States	A Phase II Study of Neoadjuvant E7 TCR T Cell Immunotherapy for Borderline Resectable and Unresectable Stage I HPV-Associated Oropharyngeal Cancer
NCT04050709	Solid Tumors	PD-L1	Phase 1	Active, not recruiting	Jul-2019	Aug-2023	Dec-2023	0	0	NantWorks	United States	PD-L1 t-haNK
NCT04106076	AML	CD123	Phase 1	Withdrawn	Jul-2019	Dec-2019	Dec-2019	0	0	Cellectis	France	UCART-123
NCT04162119	Multiple Myeloma	BCMA+PD1	Phase 2	Recruiting	Jul-2019	Oct-2021	Oct-2022	0	0	Chinese PLA General Hospital	China	Safety and Efficiency Study of BCMA-PD1-CART Cells in Relapsed/Refractory Multiple Myeloma
NCT04162340	Multiple Myeloma	CD4	Phase 1	Recruiting	Jul-2019	Oct-2021	Oct-2021	0	0	iCell Gene Therapeutics	United States	multiple myeloma CAR-T cell therapy
NCT04163302	B-Cell Lymphoma	CD19+PD1	Phase 2	Recruiting	Jul-2019	Jul-2021	Jul-2022	0	0	Chinese PLA General Hospital	China	Safety and Efficiency Study of CD19-PD1-CART Cell in Relapsed/Refractory B Cell Lymphoma
NCT02757391	Colorectal Cholangiocarcinoma Gastrointestinal Esophageal Gastric Pancreatic	CD8	Phase 1	Terminated	Aug-2019	Oct-2020	Oct-2020	0	0	M.D. Anderson Cancer Center|National Cancer Institute (NCI)	United States	CD8+ T Cell Therapy and Pembrolizumab in Treating Patients With Metastatic Gastrointestinal Tumors
NCT03814447	Ovarian	MESO	Early Phase 1	Recruiting	Aug-2019	Jan-2021	Jan-2022	0	0	Hrain Biotechnology Co., Ltd.	China	The Fourth Generation CART-cell Therapy for Refractory-Relapsed Ovarian Cancer
NCT03884751	Liver	GPC3	Phase 1	Recruiting	Aug-2019	Aug-2021	May-2024	0	0	CARsgen Therapeutics	China	KJgpc3-001
NCT03925896	Nasopharyngeal	LMP2	Phase 1	Recruiting	Aug-2019	Aug-2020	Aug-2022	0	0	Sun Yat-sen University	China	Phase I Trial of LMP2 Antigen-specific TCR T-cell Therapy for Recurrent and Metastatic NPC Patients
NCT03952923	B-Cell Lymphoma B-Cell Leukemia	CD19	Phase 1	Recruiting	Aug-2019	Jul-2021	Oct-2021	0	0	Hebei Yanda Ludaopei Hospital|China Immunotech (Beijing) Biotechnology Co., Ltd.|Avalon GloboCare	China	CART-cell therapy
NCT03971747	Liver	AFP	Phase 1	Recruiting	Aug-2019	Jun-2020	Apr-2021	0	0	Cellular Biomedicine Group	China	C-TCR055
NCT03994705	Multiple Myeloma	BCMA	Phase 1Phase 2	Recruiting	Aug-2019	Dec-2021	Dec-2022	0	0	Cartesian Therapeutics	United States	Descartes-011
NCT03994913	B-Cell Lymphoma	CD19	Phase 1Phase 2	Recruiting	Aug-2019	Jun-2022	Sep-2022	0	0	CARsgen Therapeutics	China	CSG-CD19
NCT03997474	Melanoma	Neoantigen	Phase 1Phase 2	Recruiting	Aug-2019	Jul-2023	Dec-2023	0	0	Achilles Therapeutics	United Kingdom	ATL-001
NCT04004637	T-Cell Lymphoma|NK/T-Cell Lymphoma	CD7+NK	Phase 1	Recruiting	Aug-2019	Jun-2021	Jun-2021	0	0	PersonGen Biomedicine	China	CD7 CAR-T cell therapy
NCT04007978	B_Cell Lymphoma ALL	CD22	Phase 1	Recruiting	Aug-2019	Jun-2022	Dec-2022	0	0	Wuhan Bio-Raid Biotechnology	China	CD22 chimaeric antigen receptor therapy
NCT04010877	AML	CLL-1+CD33+CD123	Phase 1Phase 2	Recruiting	Aug-2019	Jul-2021	Dec-2023	0	0	Shenzhen Geno-Immune Medical Institute	China	Multiple CAR-T Cell Therapy Targeting AML
NCT04037566	ALL	CD19	Phase 1	Recruiting	Aug-2019	Aug-2021	Aug-2024	0	0	Xijing Hospital|Xi'An Yufan Biotechnology Co.,Ltd	China	CRISPR (HPK1) Edited CD19-specific CAR-T Cells (XYF19 CAR-T Cells) for CD19+ Leukemia or Lymphoma.
NCT04097301	AML Multiple Myeloma	CD44	Phase 1Phase 2	Recruiting	Aug-2019	Jun-2023	Jun-2023	0	0	AGC Biologics S.p.A.	Italy	CAR-CD44v6
NCT03915184	Multiple Myeloma	BCMA	Phase 1	Recruiting	Sep-2019	Aug-2021	Aug-2023	0	0	CARsgen Therapeutics	China	BCMA-CAR-T cells
NCT03941626	Esophageal Liver Glioma Gastric	EGFR	Phase 1Phase 2	Recruiting	Sep-2019	May-2021	Dec-2021	0	0	Shenzhen BinDeBio	China	CAR-T/TCR-T cell immunotherapy
NCT04003649	Glioblastoma	IL13Ra2	Phase 1	Recruiting	Sep-2019	Dec-2022	Dec-2022	0	0	Mustang Bio	United States	MB-101
NCT04033302	T-Cell Leukemia|T-Cell Lymphoma|AML|NK-Cell Lymphoma	CD7	Phase 1Phase 2	Recruiting	Sep-2019	Jul-2021	Dec-2023	0	0	Shenzhen Geno-Immune Medical Institute	China	Multi-CAR T Cell Therapy Targeting CD7-positive Malignancies
NCT04034446	ALL	CD19+CD22	Early Phase 1	Active, not recruiting	Sep-2019	Dec-2021	Dec-2023	0	0	Juventas Cell Therapy	China	CD19-CD22 Chimeric Antigen Receptor T (CAR-T) Cell
NCT04052061	DLBCL	CD19	Phase 1	Not yet recruiting	Sep-2019	Sep-2023	Dec-2023	0	0	NantWorks	United States	CD19.taNK
NCT04083495	T-Cell Lymphoma	CD30	Phase 2	Recruiting	Sep-2019	Aug-2022	Aug-2037	0	0	UNC Lineberger Comprehensive Cancer Center	United States	CD30 CAR for Relapsed/Refractory CD30+ T Cell Lymphoma
NCT04085159	Neurofibromatosis	0	Phase 1Phase 2	Recruiting	Sep-2019	Jan-2021	Dec-2022	0	0	Shenzhen Geno-Immune Medical Institute|Shenzhen Hospital of Southern Medical University|Shenzhen Children's Hospital	China	Immunotherapy Based on Antigen-specific Immune Effector Cells Targeting Neurofibromatosis or Schwannomatosis
NCT04088890	ALL B-Cell Lymphoma DLBCL	CD22	Phase 1	Recruiting	Sep-2019	Sep-2022	Sep-2034	0	0	Stanford University	United States	Autologous CD22 CAR T Cells in Adults w/ Recurrent or Refractory B Cell Malignancies
NCT04093596	Multiple Myeloma	BCMA	Phase 1	Recruiting	Sep-2019	Nov-2021	Nov-2024	0	0	Allogene Overland Biopharm	United States	ALLO-715
NCT04134325	HL	CD30	Early Phase 1	Recruiting	Sep-2019	Dec-2021	Dec-2036	0	0	UNC Lineberger Comprehensive Cancer Center|American Society of Clinical Oncology	United States	Study of PD-1 Inhibitors After CD30.CAR T Cell Therapy in Relapsed/Refractory Hodgkin Lymphoma
NCT04191941	B-Cell Lymphoma|ALL|Multiple Myeloma	CD19	Early Phase 1	Recruiting	Sep-2019	Aug-2021	Dec-2021	0	0	Timmune Biotech	China	CAR-T cell therapy
NCT04265963	AML	CD123	Phase 1Phase 2	Recruiting	Sep-2019	Dec-2021	Jul-2022	0	0	Chongqing Precision Biotech	China	CD123 CAR-T cells
NCT04322292	Multiple Myeloma	BCMA	Phase 1	Recruiting	Sep-2019	Aug-2021	Nov-2021	0	0	Institute of Hematology & Blood Diseases Hospital	China	A Study of BCMA-directed CAR-T Cells Treatment in Subjects With r/r Multiple Myeloma
NCT04649983	B-Cell Lymphoma ALL	CD19 CD22	Phase 1Phase 2	Recruiting	Sep-2019	Dec-2021	Jul-2022	0	0	Chongqing Precision Biotech Co., Ltd	China	CD19 and CD22 Targeted CAR-T Cell Therapy for Relapsed/Refractory B Cell Leukemia and Lymphoma
NCT04691713	Solid Tumors	B7H3	Phase 2	Recruiting	Sep-2019	Feb-2021	Dec-2021	0	0	PersonGen BioTherapeutics	China	anti-CD276 CAR-T therapy
NCT03579927	B-Cell Lymphoma	CD19 NK	Phase 1Phase 2	Withdrawn	Oct-2019	Oct-2019	Oct-2019	0	0	M.D. Anderson Cancer Center	United States	CAR.CD19-CD28-zeta-2A-iCasp9-IL15-Transduced Cord Blood NK Cells
NCT03765177	ALL NHL	CD19	Phase 1Phase 2	Recruiting	Oct-2019	Oct-2022	Oct-2022	0	0	Ottawa Hospital Research Institute	Canada	CLIC-1901 for the Treatment of Patients With Relapsed/Refractory CD19 Positive Hematologic Malignancies
NCT03937791	Vulvar	HPV16 E7	Phase 2	Terminated	Oct-2019	Jun-2020	Jun-2020	0	0	National Cancer Institute (NCI)	United States	Immunotherapy With E7 T Cell Receptor T Cells for Vulvar High-Grade Squamous Intraepithelial Lesions
NCT04007029	CLL DLBCL Follicular Lymphoma Mantle Cell Lymphoma DLBCL	CD19+CD20	Phase 1	Recruiting	Oct-2019	Aug-2022	Aug-2023	0	0	Jonsson Comprehensive Cancer Center|National Cancer Institute (NCI)|Parker Institute for Cancer Immunotherapy	United States	Modified Immune Cells (CD19/CD20 CAR-T Cells) in Treating Patients With Recurrent or Refractory B-Cell Lymphoma or Chronic Lymphocytic Leukemia
NCT04025216	NSCLC Ovarian Fallopian Breast Multiple Myeloma Pancreatic	MUC1	Phase 1	Recruiting	Oct-2019	Dec-2022	Oct-2036	0	0	Tmunity Therapeutics	United States	TmTN-MUC-01
NCT04028440	B-Cell Lymphoma	GD2	Early Phase 1	Recruiting	Oct-2019	Dec-2020	Mar-2022	0	0	Institute of Hematology & Blood Diseases Hospital|Beijing GD Initiative Cell Therapy Technology Co.ï¼ŒLtd.|Chinese Academy of Medical Sciences	China	Î³Î´T Cells Immunotherapy in Patients With Relapsed or Refractory Non-Hodgkin's Lymphoma (NHL)
NCT04049513	NHL DLBCL PMBCL Follicular Mantle Cell	CD19	Phase 1	Recruiting	Oct-2019	Sep-2021	Aug-2026	0	0	Wellington Zhaotai Therapies	Netherlands	WZTL-002
NCT04121273	Liver	GPC3	Phase 1	Recruiting	Oct-2019	Oct-2021	Nov-2021	0	0	The Affiliated Nanjing Drum Tower Hospital of Nanjing University Medical School	China	GPC3-targeted CAR-T Cell for Treating GPC3 Positive Advanced HCC
NCT04129099	ALL	GOC22F	Early Phase 1	Recruiting	Oct-2019	Sep-2020	Jun-2022	0	0	Gracell Biotechnologies	China	GC-022
NCT04150497	ALL	CD22	Phase 1	Recruiting	Oct-2019	Oct-2022	Oct-2022	0	0	Cellectis	France	UCART-22
NCT04182581	Multiple Myeloma	BCMA CD19	Early Phase 1	Recruiting	Oct-2019	Sep-2020	May-2021	0	0	Xijing Hospital|Gracell Biotechnology Ltd.	China	A Study of BCMA/CD19 Dual-Target CAR-T Cell Immunotherapy for Relapsed or Refractory Multiple Myeloma
NCT04204161	ALL|B-Cell Lymphoma	CD19+CD22	Phase 1	Recruiting	Oct-2019	Oct-2021	Oct-2024	0	0	Shenzhen BinDeBio	China	CAR-T/TCR-T cell immunotherapy
NCT04206943	ALL|B-Cell Lymphoma	CD19	Phase 1Phase 2	Recruiting	Oct-2019	Jan-2021	Jan-2021	0	0	Acibadem University|AcÄ±badem Atunizade Hospital|The Scientific and Technological Research Council of Turkey|AcÄ±badem Labcell	Turkey	Study of CD19 Specific Chimeric Antigen Receptor Positive T Cells (CAR-T) in ALL and NHL
NCT04295018	Multiple Myeloma	BCMA	Phase 1	Recruiting	Oct-2019	Sep-2021	Dec-2021	0	0	Peking Union Medical College Hospital|Cellular Biomedicine Group Ltd.	China	A Study of BCMA-directed CAR-T Cells Treatment in Subjects With r/r Multiple Myeloma
NCT03752541	Multiple Myeloma	BCMA	Phase 1	Recruiting	Nov-2019	Nov-2020	Nov-2021	0	0	Shanghai Bioray Laboratory	China	Efficacy and Safety Evaluation of BCMA-UCART
NCT04002401	DLBCL	CD19	Phase 2	Active, not recruiting	Nov-2019	Jun-2021	Jun-2036	0	0	Gilead|Kite Pharma	United States	axicabtagene ciloleucel
NCT04094311	B-cell Acute Lymphoblastic Leukemia|Diffuse Large B-cell Lymphoma	CD19	Phase 3	Recruiting	Nov-2019	Mar-2022	Mar-2022	0	0	Novartis	United States	tisagenlecleucel-t
NCT04104607	Prostate	PSMA+CD3	Phase 1	Recruiting	Nov-2019	Mar-2022	Sep-2022	0	0	University Hospital Tuebingen|German Cancer Research Center	Germany	the Bispecific PSMAxCD3 Antibody CC-1 in Patients With Castration Resistant Prostate Carcinoma
NCT04119024	Melanoma	IL13Ra2	Phase 1	Recruiting	Nov-2019	Oct-2024	Oct-2025	0	0	Jonsson Comprehensive Cancer Center|National Cancer Institute (NCI)	United States	Gene Modified Immune Cells (IL13Ralpha2 CAR T Cells) After Conditioning Regimen for the Treatment of Stage IIIC or IV Melanoma
NCT04133636	Multiple Myeloma	BCMA	Phase 2	Recruiting	Nov-2019	Apr-2022	Aug-2024	0	0	Janssen	United States	ciltacabtagene autoleucel
NCT04142619	Multiple Myeloma	CS1	Phase 1	Recruiting	Nov-2019	Nov-2022	Nov-2022	0	0	Cellectis S.A.	France	Study Evaluating Safety and Efficacy of UCART Targeting CS1 in Patients With Relapsed/Refractory Multiple Myeloma (MELANI-01)
NCT04151186	Solid Tumors	TM4SF1 EPCAM	Phase 1	Not yet recruiting	Nov-2019	May-2021	Nov-2021	0	0	Shanghai Biomed-union Biotechnology Co., Ltd.|Tang-Du Hospital	China	A Clinical Study on the Safety and Efficacy of CAR-T Therapy for the TM4SF1- and EpCAM-positive Solid Tumors
NCT04153799	NSCLC	CXCR5	Phase 1	Recruiting	Nov-2019	Dec-2021	Dec-2022	0	0	Guangzhou Bio-gene Technology	China	CXCR5 modified EGFR chimaeric antigen receptor therapy
NCT04162353	Multiple Myeloma	BCMA+CD19	Phase 1	Recruiting	Nov-2019	Sep-2021	Sep-2021	0	0	iCell Gene Therapeutics	United States	BCMA-CD19 cCAR T cells
NCT04166838	ALL	CD19	Early Phase 1	Recruiting	Nov-2019	Nov-2019	Nov-2019	0	0	Shanghai Longyao Biotechnology	China	CD19 UCAR-Tcell therapy
NCT04167696	AML|MDS	NKG2D	Phase 1	Recruiting	Nov-2019	Dec-2021	Feb-2035	0	0	Celyad Oncology	Belgium	CYAD-02
NCT04169932	B-Cell Lymphoma	CD20	Early Phase 1	Recruiting	Nov-2019	Nov-2022	Nov-2022	0	0	Shanghai Longyao Biotechnology	China	LY-007
NCT04227275	Prostate	PSMA	Phase 1	Active, not recruiting	Nov-2019	Nov-2022	Nov-2036	0	0	Tmunity Therapeutics	United States	TmPSMA-01
NCT04250324	DLBCL	CD19	Phase 1	Recruiting	Nov-2019	Aug-2022	Dec-2022	0	0	Shanghai Cell Therapy Group Co.,Ltd|Institute of Hematology & Blood Diseases Hospital|Tianjin Medical University Cancer Institute and Hospital	China	Study of Safety and Efficacy of BZ019 in (R/R) Large B-cell Lymphoma
NCT03967223	Neoplasms	NY-ESO-1 LAGE-1a	Phase 2	Recruiting	Dec-2019	Nov-2022	Jul-2026	0	0	GlaxoSmithKline	United Kingdom	letetresgene-autoleucel
NCT04026100	DLBCL	CD19	Phase 1	Not yet recruiting	Dec-2019	Aug-2022	Dec-2022	0	0	Nanjing Bioheng Biotech	China	CTA-101
NCT04107142	Colorectal|Breast|Sarcoma|Nasopharyngeal|Prostate|Gastric	NKG2D	Phase 1	Not yet recruiting	Dec-2019	Sep-2020	Mar-2021	0	0	CytoMed Therapeutics	Singapore	NKG2DL-targeting chimeric antigen receptor-grafted gamma delta T cell therapy
NCT04134117	CNS	CD19	Phase 1	Recruiting	Dec-2019	Nov-2021	Nov-2022	0	0	Matthew J. Frigault, M.D.|Novartis|Massachusetts General Hospital	United States	Tisagenlecleucel In Primary CNS Lymphoma
NCT04154709	ALL	CD19	Phase 1	Recruiting	Dec-2019	Nov-2021	Jun-2022	0	0	Nanjing Bioheng Biotech Co., Ltd.	China	CTA101 UCAR-T Cell Injection for Treatment of Relapsed or Refractory CD19+ B-cell Acute Lymphoblastic Leukemia
NCT04185038	CNS|Glioma	B7H3	Phase 1	Recruiting	Dec-2019	May-2026	May-2041	0	0	Seattle Children's Hospital	United States	Study of B7-H3-Specific CAR T Cell Locoregional Immunotherapy for Diffuse Intrinsic Pontine Glioma/Diffuse Midline Glioma and Recurrent or Refractory Pediatric Central Nervous System Tumors
NCT04194931	Multiple Myeloma	BCMA+CD19	Phase 1	Recruiting	Dec-2019	Dec-2020	Dec-2020	0	0	The First Affiliated Hospital of Nanchang University	China	Humanized CAR-T Cells of Anti-BCAM and Anti-CD19 Against Relapsed and Refractory Multiple Myeloma
NCT04196205	ALL	CD19	Phase 1Phase 2	Recruiting	Dec-2019	Aug-2020	Aug-2021	0	0	The First Affiliated Hospital of Nanchang University	China	Anti-CD19 CAR-T Cells for Relapsed or Refractory Acute Lymphoblastic Leukemia and Lymphomas
NCT04214886	ALL|B-Cell Lymphoma	CD19	Phase 1	Recruiting	Dec-2019	Dec-2021	Dec-2034	0	0	Loyola University|Leukemia Research Foundation	United States	CD19 Chimeric Antigen Receptor (CAR) T Cells for Adults With Recurrent or Refractory B Cell Malignancies
NCT04215016	DLBCL	CD19+CD20	Phase 1	Recruiting	Dec-2019	Dec-2023	Dec-2024	0	0	Fujian Medical University	China	Safety of Autologous Humanized Anti-CD19 and Anti-CD20 Dual Specific CAR-T Cells in Adult Patients With Diffuse Large B-cell Lymphoma
NCT04271800	B-Cell Lymphoma|ALL|CLL	CD19	Phase 1Phase 2	Recruiting	Dec-2019	Dec-2022	Jul-2023	0	0	Chongqing Precision Biotech	China	pCAR-19B cells
NCT04272125	AML	CD123	Phase 1Phase 2	Recruiting	Dec-2019	Dec-2022	Jul-2023	0	0	Chongqing Precision Biotech	China	CD123 CAR-T cells
NCT04272151	Multiple Myeloma	BCMA	Phase 1Phase 2	Recruiting	Dec-2019	Dec-2022	Jul-2023	0	0	Chongqing Precision Biotech	China	BCMA CAR-T cells
NCT04692948	AML	B7H3	Early Phase 1	Recruiting	Dec-2019	Dec-2021	Dec-2023	0	0	PersonGen BioTherapeutics (Suzhou) Co., Ltd.	China	TAA6 Cell Injection In The Treatment of Patients With Relapsed / Refractory Acute Myeloid Leukemia
NCT03971799	AML	CD33	Phase 1Phase 2	Recruiting	Jan-2020	Dec-2024	Dec-2039	0	0	Center for International Blood and Marrow Transplant Research|National Marrow Donor Program|St. Baldrick's Foundation	United States	Study of Anti-CD33 Chimeric Antigen Receptor-Expressing T Cells (CD33CART) in Children and Young Adults With Relapsed/Refractory Acute Myeloid Leukemia
NCT04020575	Breast	huMNC+CD44	Phase 1	Recruiting	Jan-2020	Jan-2023	Jan-2035	0	0	Minerva Biotechnologies	United States	MUC1 CAR-T cell therapy
NCT04088864	B Cell Lymphoma|ALL	CD22	Phase 1	Recruiting	Jan-2020	Aug-2025	Aug-2035	0	0	Stanford University	United States	CD22-CAR T Cells in Children and Young Adults With B Cell Malignancies
NCT04093648	Liver	GPC3	Phase 1	Withdrawn	Jan-2020	Feb-2023	Jan-2038	0	0	Baylor College of Medicine|Texas Children's Hospital|The Methodist Hospital System	United States	T Cells co- Expressing a Second Generation Glypican 3-specific Chimeric Antigen Receptor With Cytokines Interleukin-21 and 15 as Immunotherapy for Patients With Liver Cancer (TEGAR)
NCT04173988	ALL	CD19	Early Phase 1	Recruiting	Jan-2020	Oct-2021	Jul-2022	0	0	Children's Hospital of Fudan University	China	Study of alloCART-19 Cell Therapy in Pediatric Patients With Relapsed/Refractory B-Cell Acute Lymphoblastic Leukemia
NCT04227015	B-Cell Lymphoma|ALL	CD19	Early Phase 1	Recruiting	Jan-2020	Jan-2022	May-2027	0	0	Nanjing Bioheng Biotech	China	CTA-101
NCT04230265	AML|ALL}BPDCN	CD123	Phase 1	Recruiting	Jan-2020	Feb-2022	Apr-2022	0	0	Cellex Patient Treatment	Germany	UniCAR-T-CD123
NCT04232826	B-Cell Lymphoma	CD19	Phase 1	Completed	Jan-2020	Sep-2020	Mar-2023	0	0	Juventas Cell Therapy	China	HY-001
NCT04236011	Multiple Myeloma	BCMA+CD19	Early Phase 1	Recruiting	Jan-2020	Jul-2022	Dec-2022	0	0	Shanghai Changzheng Hospital|Gracell Biotechnologies (Shanghai) Co., Ltd	China	BCMA and CD19 Targeted Fast Dual CAR-T for BCMA+ Refractory/Relapsed Multiple Myeloma
NCT04244656	Multiple Myeloma	BCMA	Phase 1	Recruiting	Jan-2020	Nov-2026	Jan-2027	0	0	CRISPR Therapeutics	United States	CTX-120
NCT04429451	Solid Tumors	PSMA	Phase 1Phase 2	Recruiting	Jan-2020	Oct-2023	Dec-2024	0	0	Shenzhen Geno-Immune Medical Institute|Shenzhen Children's Hospital|The Seventh Affilliated Hospital, Sun Yat-Sen University|Shenzhen Hospital of Southern Medical University	China	PSMA-specific CAR-T Cell Therapy
NCT03853317	Merkel Cell	CD16	Phase 2	Recruiting	Feb-2020	Mar-2022	Mar-2022	0	0	NantKwest, Inc.|NantCell, Inc.	United States	QUILT-3.063: A Study of N-803, haNK and Avelumab in Patients With Merkel Cell Carcinoma That Has Progressed After Checkpoint Therapy
NCT04099797	Glioma	C7R+GD2	Phase 1	Recruiting	Feb-2020	Feb-2023	Feb-2038	0	0	Baylor College of Medicine|Texas Children's Hospital|Center for Cell and Gene Therapy, Baylor College of Medicine	United States	C7R-GD2.CAR T Cells for Patients With GD2-expressing Brain Tumors (GAIL-B)
NCT04100187	B-Cell Lymphoma B-Cell Leukemia	CD10	Phase 1	Not yet recruiting	Feb-2020	Aug-2021	Aug-2022	0	0	Kecellitics Biotech Company Ltd	China	anti-CD19 chimaeric antigen receptor
NCT04109482	BPDCN AML HRMDS	CD123	Phase 1Phase 2	Recruiting	Feb-2020	Mar-2023	Apr-2026	0	0	Mustang Bio	United States	MB-102
NCT04163575	Leukemia|Lymphoma	CD22	Phase 1Phase 2	Not yet recruiting	Feb-2020	Jul-2021	Jul-2022	0	0	Kecellitics Biotech Company	China	anti-CD22 chimaeric antigen receptor
NCT04214392	Glioblastoma|Glioma	CD19+CD28+CD3zeta	Phase 1	Recruiting	Feb-2020	Feb-2023	Feb-2023	0	0	City of Hope Medical Center|National Cancer Institute (NCI)	United States	Chimeric Antigen Receptor (CAR) T Cells With a Chlorotoxin Tumor-Targeting Domain for the Treatment of Recurrent or Progressive Glioblastoma
NCT04226989	B-Cell Lymphoma|ALL	CD19	Early Phase 1	Recruiting	Feb-2020	Feb-2022	May-2024	0	0	Nanjing Bioheng Biotech	China	CT-RD06
NCT04249947	Prostate	PSMA	Phase 1	Recruiting	Feb-2020	Sep-2023	Sep-2036	0	0	Poseida Therapeutics	United States	P-PSMA-101
NCT04257175	AML	CD19	Phase 2Phase 3	Recruiting	Feb-2020	Mar-2023	Dec-2023	0	0	Sheba Medical Center	Israel	CAR-T CD19 for Acute Myelogenous Leukemia With t 8:21 and CD19 Expression
NCT04260932	B-Cell Lymphoma	CD19+CD20	Phase 1	Recruiting	Feb-2020	Aug-2021	Nov-2021	0	0	Hebei Yanda Ludaopei Hospital|China Immunotech Co., Ltd.	China	CD19/CD20 Dual-CAR-T in B-cell Lymphoma Patients
NCT04260945	ALL	CD19+CD20	Phase 1	Recruiting	Feb-2020	Aug-2021	Nov-2021	0	0	Hebei Yanda Ludaopei Hospital|China Immunotech Co., Ltd.	China	CD19/CD20 Dual-CAR-T in B-cell Leukemia Patients
NCT04262466	Solid Tumors	PRAME	Phase 1Phase 2	Recruiting	Feb-2020	Feb-2022	Feb-2024	0	0	Immunocore Ltd	United Kingdom	IMC-F106C
NCT04348643	Lung|Colorectal|Liver|Pancreatic|Gastric|Breast	CEA	Phase 1Phase 2	Recruiting	Feb-2020	Jan-2023	Apr-2023	0	0	Chongqing Precision Biotech	China	CEA CAR-T cell therapy
NCT04030195	B-Cell Lymphoma|CLL	CD20	Phase 1Phase 2	Recruiting	Mar-2020	Mar-2022	Feb-2023	0	0	Precision Biosciences	United States	PBCAR20A
NCT04160195	B-Cell Lymphoma|CLL	CD19 CD20	Phase 1	Suspended	Mar-2020	Dec-2023	Dec-2024	0	0	National Cancer Institute (NCI)|National Institutes of Health Clinical Center (CC)	United States	T Cells Expressing Fully-human Anti-CD19 and Anti-CD20 Chimeric Antigen Receptors for Treating B-cell Malignancies and Hodgkin Lymphoma
NCT04213469	B-Cell Lymphoma	CD19	Phase 2	Recruiting	Mar-2020	Mar-2021	Apr-2022	0	0	Shanghai Bioray Laboratory	China	CD19-CART
NCT04230473	ALL	CD19	Phase 1	Completed	Mar-2020	Dec-2020	Mar-2023	0	0	Juventas Cell Therapy	China	HY-001
NCT04245722	B-Cell Lymphoma CLL	CD19	Phase 1	Recruiting	Mar-2020	Apr-2022	Apr-2037	0	0	Fate Therapeutics	United States	FT-596
NCT04270461	Liver	NKG2D	Phase 1	Withdrawn	Mar-2020	Oct-2020	Oct-2020	0	0	Jiujiang University Affiliated Hospital|KAEDI	China	NKG2D-based CAR T-cells Immunotherapy for Patient With r/r NKG2DL+ Solid Tumors
NCT04276870	ALL	CD19	Phase 2	Recruiting	Mar-2020	Mar-2023	Mar-2035	0	0	University of Pennsylvania	United States	Phase 2 Trial of CD19 Redirected Autologous T Cells
NCT04289220	B-Cell Lymphoma|ALL	CD19	Phase 1	Not yet recruiting	Mar-2020	Mar-2023	Sep-2023	0	0	Yan'an Affiliated Hospital of Kunming Medical University	China	Anti-CD19 CAR in PiggyBac Transposon-Engineered T Cells for Relapsed/Refractory B-cell Lymphoma or B-cell Acute Lymphoblastic Leukemia
NCT04318964	Sarcoma	NY-ESO-1	Phase 1	Recruiting	Mar-2020	Sep-2021	Jun-2022	0	0	Sun Yat-sen University|Guangdong Xiangxue Precision Medical Technology Co., Ltd.	China	TAEST16001 in the Treatment of Soft Tissue Sarcoma
NCT04323657	B-Cell Lymphoma|ALL	CD19	Phase 1Phase 2	Recruiting	Mar-2020	Apr-2022	Apr-2024	0	0	TCR2 Therapeutics	United States	TC-110
NCT04404660	ALL	CD19	Phase 1Phase 2	Recruiting	Mar-2020	Mar-2023	Apr-2024	0	0	Autolus	United Kingdom	AUTO-1
NCT04503980	Colorectal|Ovarian	Mesothelin	Early Phase 1	Recruiting	Mar-2020	Mar-2021	Jun-2022	0	0	Shanghai Cell Therapy Group Co.,Ltd|Shanghai 10th People's Hospital	China	Î±PD1-MSLN-CAR T Cells for the Treatment of MSLN-positive Advanced Solid Tumors
NCT03774654	B-Cell Lymphoma CLL Non Hodgkin Lymphoma	CD19+NK	Phase 1	Recruiting	Apr-2020	Apr-2023	Mar-2035	0	0	Baylor College of Medicine|Kuur	United States	CD19.CAR Allogeneic NKT for Patients With Relapsed or Refractory B-Cell Malignancies (ANCHOR)
NCT04146298	Pancreatic	KRAS+G12V	Phase 1Phase 2	Recruiting	Apr-2020	Dec-2022	Mar-2023	0	0	Providence Cancer Center, Earle A. Chiles Research Institute|Changhai Hospital	China	Mutant KRAS G12V-specific TCR Transduced T Cell Therapy for Advanced Pancreatic Cancer
NCT04171843	Multiple Myeloma	BCMA	Phase 1Phase 2	Recruiting	Apr-2020	May-2021	May-2021	0	0	Precision Biosciences	United States	PBCAR-269A
NCT04234061	Mantle Cell Lymphoma	CD19	Phase 2	Recruiting	Apr-2020	Sep-2027	Sep-2030	0	0	Peter MacCallum Cancer Centre, Australia|Novartis	Australia	Clinical Trial to Assess The Efficacy and Safety of the Combination of Tisagenlecleucel And Ibrutinib in Mantle Cell Lymphoma
NCT04264039	B-Cell Lymphoma|ALL	CD19	Early Phase 1	Not yet recruiting	Apr-2020	Apr-2021	Apr-2022	0	0	Xinqiao Hospital of Chongqing|Gracell Biotechnologies (Shanghai) Co., Ltd|920th Hospital of Joint Logistics Support Force|The Second Affiliated Hospital of Chongqing Medical University|The Affiliated Hospital Of Guizhou Medical University|Central South University|The First Affiliated Hospital of Kunming Medical College|The General Hospital of Western Theater Command|Second Affiliated Hospital of …	China	Anti-CD19 U-CAR-T Cell Therapy for B Cell Hematologic Malignancies
NCT04264078	NK/T-Cell Leukemia|NK/T-Cell Lymphoma	CD7	Early Phase 1	Not yet recruiting	Apr-2020	Apr-2021	Apr-2022	0	0	Xinqiao Hospital of Chongqing|Gracell Biotechnologies (Shanghai) Co., Ltd|920th Hospital of Joint Logistics Support Force|The Second Affiliated Hospital of Chongqing Medical University|The Affiliated Hospital Of Guizhou Medical University|Central South University|The First Affiliated Hospital of Kunming Medical College|The General Hospital of Western Theater Command|Second Affiliated Hospital of …	China	Anti-CD7 U-CAR-T Cell Therapy for T/NK Cell Hematologic Malignancies
NCT04368182	Liver	AFP	Phase 1	Recruiting	Apr-2020	Aug-2020	Nov-2021	0	0	Zhejiang University	China	AFP Specific T Cell Receptor Transduced T Cells Injection(C-TCR055) in Unresectable Hepatocellular Carcinoma
NCT04626726	ALL	CD19 CD22	Early Phase 1	Recruiting	Apr-2020	May-2023	May-2023	0	0	Hebei Senlang Biotechnology Inc., Ltd.	China	Adult B-ALL Treated by CART Cell Bridging Allogeneic Hematopoietic Stem Cell Transplantation
NCT04626739	B-Cell Lymphoma	CD19+CD22	Early Phase 1	Recruiting	Apr-2020	Mar-2023	Mar-2023	0	0	Hebei Senlang Biotechnology Inc., Ltd.	China	CAR-T Cells in Treating Patients With Relapsed or Refractory NHL
NCT04626752	Multiple Myeloma	BCMA	Early Phase 1	Recruiting	Apr-2020	Mar-2023	Mar-2023	0	0	Hebei Senlang Biotechnology	China	BCMA chimaeric antigen receptor therapy
NCT04626765	ALL	CD19+CD22	Early Phase 1	Recruiting	Apr-2020	Mar-2023	May-2023	0	0	Hebei Senlang Biotechnology Inc., Ltd.|The Second Hospital of Hebei Medical University	China	CAR-T for Children With Relapsed and Refractory Acute Lymphoblastic Leukemia
NCT03880279	B-Cell Lymphoma	CD19	Phase 1Phase 2	Not yet recruiting	May-2020	Apr-2022	Apr-2024	0	0	Triumvira Immunologics	United States	TAC01-CD19
NCT04186520	Mantle Cell Lymphoma	CD19+CD20	Phase 1Phase 2	Recruiting	May-2020	May-2023	May-2025	0	0	Medical College of Wisconsin	United States	CAR-20/19-T Cells in Patients With Relapsed Refractory B Cell Malignancies
NCT04196491	Multiple Myeloma	BCMA	Phase 1	Recruiting	May-2020	Jan-2025	Jan-2025	0	0	Bluebird Bio	United States	idecabtagene vicleucel
NCT04231747	DLBCL	CD19	Phase 1	Recruiting	May-2020	Jan-2025	Jan-2025	0	0	Bristol-Myers Squibb|Celgene|Juno	United States	CC-97540
NCT04303247	B-Cell Lymphoma	CD19 CD22	Early Phase 1	Not yet recruiting	May-2020	May-2021	May-2023	0	0	Xinqiao Hospital of Chongqing|Gracell Biotechnologies (Shanghai) Co., Ltd|920th Hospital of Joint Logistics Support Force|The Affiliated Hospital Of Guizhou Medical University|Tang-Du Hospital|The General Hospital of Western Theater Command|Chongqing University Cancer Hospital	China	CD19 and CD22 Dual-targeted CAR-T Cells for Relapsed or Refractory B-NHL
NCT04309981	Multiple Myeloma	BCMA	Phase 1Phase 2	Recruiting	May-2020	Apr-2023	Apr-2023	0	0	Sara V. Latorre|Fondos ARI (Assistencia Recerca Intensiva)|Instituto de Salud Carlos III|Fondo Social La Caixa|Institut d'Investigacions BiomÃ¨diques August Pi i Sunyer	Spain	Clinical Trial Using Humanized CART Directed Against BCMA (ARI0002h) in Patients With Relapsed/Refractory Multiple Myeloma to Proteasome Inhibitors, Immunomodulators and Anti-CD38 Antibody.
NCT04314843	DLBCL	CD19	Phase 1Phase 2	Recruiting	May-2020	Jan-2022	Jan-2037	0	0	Gilead|Kite Pharma	United States	axicabtagene ciloleucel
NCT04318678	AML	CD123	Phase 1	Recruiting	May-2020	Jul-2024	Jul-2025	0	0	St. Jude Children's Research Hospital	United States	CD123-Directed Autologous T-Cell Therapy for Acute Myelogenous Leukemia (CATCHAML)
NCT04325841	ALL	CD19	Phase 2	Recruiting	May-2020	May-2022	Nov-2022	0	0	Beijing Boren Hospital	China	Phase II Study of Autologous Murine Anti-CD19 Chimeric Antigen Receptor T Cells Treating Refractory or Relapsed B Acute Lymphoblastic Leukemia Children
NCT04340154	ALL	CD19+CD22	Phase 2	Recruiting	May-2020	May-2022	Nov-2022	0	0	Beijing Boren Hospital	China	Study of Sequential CAR-T Cell Treating Leukemia Children
NCT04340167	ALL	CD22	Phase 2	Recruiting	May-2020	May-2022	Oct-2022	0	0	Beijing Boren Hospital	China	Study of Anti-CD22 CAR-T Cells Treating Leukemia Children
NCT04384393	All|CLL|B-Cell Lymphoma	CD19	Phase 1	Recruiting	May-2020	Nov-2021	Oct-2023	0	0	Fundamenta Therapeutics	China	ThisCART19 cell therapy
NCT04411134	Cervical	E7	Phase 1	Withdrawn	May-2020	Jul-2020	Jul-2020	0	0	National Cancer Institute (NCI)|National Institutes of Health Clinical Center (CC)	United States	E7 TCR T Cell Immunotherapy for High-Grade Cervical Intraepithelial Neoplasia
NCT04416984	DLBCL	CD19	Phase 1Phase 2	Recruiting	May-2020	Dec-2022	Dec-2022	0	0	Allogene Therapeutics	United States	ALLO-501
NCT04489862	NSCLC	Mesothelin	Early Phase 1	Recruiting	May-2020	Jun-2022	Dec-2022	0	0	Wuhan Union Hospital, China|Shanghai Cell Therapy Group Co.,Ltd	China	Î±PD1-MSLN-CAR T Cells for the Treatment of MSLN-positive Advanced Solid Tumors
NCT04605666	ALL	CD19	Phase 2	Recruiting	May-2020	Dec-2020	Jun-2021	0	0	Nanfang Hospital of Southern Medical University	China	CD19-CAR-T2 Cells for CD19 Positive Acute Lymphoblastic Leukemia
NCT03579888	ALL|CLL|B-Cell Lymphoma	CD19	Phase 1	Recruiting	Jun-2020	Nov-2021	Nov-2021	0	0	Ziopharm Oncology	United States	CD19 chimeric antigen receptor T-cell therapy, 3rd generation
NCT03628053	ALL	CD19	Phase 3	Withdrawn	Jun-2020	Oct-2025	Jan-2026	0	0	Novartis	United States	tisagenlecleucel-t
NCT04136275	B-Cell Lymphoma|T-Cell Lymphoma	CD37	Phase 1	Recruiting	Jun-2020	Sep-2022	Sep-2024	0	0	Massachusetts General Hospital	United States	CAR-37 T Cells In Hematologic Malignancies
NCT04181827	Multiple Myeloma	BCMA	Phase 3	Recruiting	Jun-2020	Apr-2026	Apr-2026	0	0	Janssen	United States	ciltacabtagene autoleucel
NCT04196413	Glioma	GD2	Phase 1	Recruiting	Jun-2020	Dec-2023	Dec-2023	0	0	Stanford University|CureSeach	United States	GD2 CAR T Cells in DiffuseIntrinsicPontine Gliomas(DIPG) & Spinal DiffuseMidline Glioma(DMG)
NCT04381741	DLBCL	CD19+IL7+CCL19	Phase 1	Recruiting	Jun-2020	Sep-2023	Sep-2023	0	0	Second Affiliated Hospital, School of Medicine, Zhejiang University	China	CD19 CAR-T Expressing IL7 and CCL19 Combined With PD1 mAb for Relapsed or Refractory Diffuse Large B Cell Lymphoma
NCT04385173	Glioblastoma	B7H3	Phase 1	Recruiting	Jun-2020	May-2022	Jul-2022	0	0	Second Affiliated Hospital, School of Medicine, Zhejiang University|BoYuan RunSheng Pharma (Hangzhou) Co., Ltd.	China	Pilot Study of B7-H3 CAR-T in Treating Patients With Recurrent and Refractory Glioblastoma
NCT04412174	B-Cell Lymphoma	CD19 CD22	Early Phase 1	Not yet recruiting	Jun-2020	Dec-2022	Dec-2022	0	0	Hebei Yanda Ludaopei Hospital|Gracell Biotechnology Ltd.	China	A Study of GC022F CAR-T Cell Immunotherapy for Relapsed or Refractory B- NHL
NCT04412889	Multiple Myeloma	CD19 BCMA	Early Phase 1	Not yet recruiting	Jun-2020	Dec-2022	Dec-2022	0	0	Hebei Yanda Ludaopei Hospital|Gracell Biotechnology Ltd.	China	A Study of BCMA/CD19 Dual-Target CAR-T Cell Immunotherapy for Relapsed or Refractory MM
NCT04427449	Solid Tumors	CD44v6	Phase 1Phase 2	Recruiting	Jun-2020	May-2023	Dec-2023	0	0	Shenzhen Geno-Immune Medical Institute|Shenzhen Hospital of Southern Medical University|The Seventh Affilliated Hospital, Sun Yat-Sen University|Shenzhen Children's Hospital	China	4SCAR-CD44v6 T Cell Therapy Targeting Cancer
NCT04429438	B-Cell Lymphoma	CD19+CD20+CD22+CD70+CD13+CD79b+GD2+PSMA	Phase 1Phase 2	Recruiting	Jun-2020	Jul-2023	Dec-2023	0	0	Shenzhen Geno-Immune Medical Institute|The Seventh Affilliated Hospital, Sun Yat-Sen University|Shenzhen Children's Hospital	China	Multi-CAR-T Cells Targeting B Cell Lymphomas
NCT04430530	ALL	CD22+CD10+CD20+CD38+CD123	Phase 1Phase 2	Recruiting	Jun-2020	May-2023	Dec-2023	0	0	Shenzhen Geno-Immune Medical Institute|ShiJiaZhuang Zhongxi Children Hospital|Shenzhen Children's Hospital|The Seventh Affilliated Hospital, Sun Yat-Sen University	China	4SCAR-T Therapy Post CD19-targeted Immunotherapy
NCT04430595	Breast	GD2+HER2+CD44v6	Phase 1Phase 2	Recruiting	Jun-2020	May-2023	Dec-2023	0	0	Shenzhen Geno-Immune Medical Institute|The Seventh Affilliated Hospital, Sun Yat-Sen University	China	Multi-4SCAR-T Therapy Targeting Breast Cancer
NCT04432649	Solid Tumors	B7H3	Phase 1Phase 2	Recruiting	Jun-2020	May-2023	May-2024	0	0	Shenzhen Geno-Immune Medical Institute|Sun Yat-sen University|Shenzhen Children's Hospital	China	Targeting CD276 (B7-H3) Positive Solid Tumors by 4SCAR-276
NCT04436029	Myeloma Multiple	BCMA	Phase 2	Recruiting	Jun-2020	Apr-2022	Apr-2025	0	0	Cartesian Therapeutics	United States	Descartes-011
NCT04438083	Renal	CD70	Phase 1	Recruiting	Jun-2020	Feb-2027	Apr-2027	0	0	CRISPR Therapeutics	United States	CTX-130
NCT04440436	B-Cell Lymphoma	CD19	Phase 1Phase 2	Recruiting	Jun-2020	Jun-2022	Jun-2035	0	0	Immunochina Pharmaceuticals	China	IM-19
NCT04447547	B-Cell Lymphoma	CD19	Phase 2	Recruiting	Jun-2020	Aug-2022	Dec-2022	0	0	Hebei Senlang Biotechnology	China	Senl_1904B
NCT04447573	Multiple Myeloma	BCMA	Phase 2	Recruiting	Jun-2020	Aug-2022	Dec-2022	0	0	Hebei Senlang Biotechnology	China	BCMA chimaeric antigen receptor therapy
NCT04610125	B-Cell Lymphoma|ALL	CD19	Phase 1	Recruiting	Jun-2020	Jun-2023	Jun-2025	0	0	Hebei Senlang Biotechnology Inc., Ltd.|Hebei Medical University Fourth Hospital	China	Clinical Trial of CAR-T in the Treatment of Relapsed and Refractory Hematopoietic and Lymphoid Tissue Tumors in Children
NCT04702841	Solid Tumors	CD7	Early Phase 1	Recruiting	Jun-2020	Jun-2022	Dec-2022	0	0	PersonGen BioTherapeutics	China	chimaeric antigen receptor-gamma delta T-cell therapy
NCT04015336	Oropharyngeal	HPV16-E7	Phase 2	Recruiting	Jul-2020	Apr-2023	Apr-2024	0	0	National Cancer Institute (NCI)|National Institutes of Health Clinical Center (CC)	United States	E7 TCR Cell Induction Immunotherapy for Stage II and Stage III HPV-Associated Oropharyngeal Cancer
NCT04053062	Prostate	PSMA	Phase 1	Recruiting	Jul-2020	Jul-2021	Dec-2022	0	0	Shanghai Bioray Laboratory	China	PSMA-specific CAR modified autologous T cell therapy
NCT04219163	AML	CLL-1	Phase 1	Recruiting	Jul-2020	Jul-2024	Jul-2038	0	0	Baylor College of Medicine|The Methodist Hospital System|Center for Cell and Gene Therapy, Baylor College of Medicine	United States	Chimeric Antigen Receptor T-cells for The Treatment of AML Expressing CLL-1 Antigen
NCT04240808	B-Cell Lymphoma	CD19	Phase 1	Recruiting	Jul-2020	Mar-2024	Mar-2024	0	0	University of Colorado, Denver	United States	Study of Feasibility and Safety of UCD19 Chimeric Antigen Receptor (CAR) T Cells in Adult Subjects With Relapsed/Refractory (R/R) B-Cell Non-Hodgkin's Lymphoma (B-NHL)
NCT04296461	B-Cell Lymphoma	CD19	Phase 1	Recruiting	Jul-2020	Jun-2021	Dec-2021	0	0	UWELL Biopharma	China	welgenaleucel
NCT04318327	Multiple Myeloma	BCMA	Phase 1	Recruiting	Jul-2020	Mar-2023	Mar-2023	0	0	Novartis	United States	PHE-885
NCT04387071	Pancreatic	TLR9	Phase 1Phase 2	Not yet recruiting	Jul-2020	Jul-2022	Jul-2023	0	0	University of Southern California|National Cancer Institute (NCI)	United States	CMP-001 and INCAGN01949 for Patients With Stage IV Pancreatic Cancer and Other Cancers Except Melanoma
NCT04405778	Solid Tumors	GPC3	Phase 1	Recruiting	Jul-2020	Nov-2022	Nov-2022	0	0	Takeda	Japan	TAK-102
NCT04408898	Head and Neck	MAGE-A4	Phase 2	Recruiting	Jul-2020	Apr-2022	Oct-2036	0	0	Adaptimmune	United Kingdom	Adaptimmune A4
NCT04433221	Sarcoma|Osteoid Sarcoma|Ewing Sarcoma	B7H3	Phase 1Phase 2	Recruiting	Jul-2020	May-2023	Dec-2023	0	0	Shenzhen Geno-Immune Medical Institute|The Seventh Affilliated Hospital, Sun Yat-Sen University|Shenzhen Children's Hospital	China	Combination Immunotherapy Targeting Sarcomas
NCT04464200	DLBCL|Follicular Lymphoma|CLL|Marginal Zone Lymphoma|Burkitt's Lymphoma	CD19	Phase 1	Recruiting	2020-07-01	2023-07-01	2023-07-01	0	0	Memorial Sloan Kettering Cancer Center|Takeda	United States	19(T2)28z1xx Chimeric Antigen Receptor (CAR) T Cells in People With B-Cell Cancers
NCT04464889	AML|CML|MDS	HA1H	Phase 1	Active, not recruiting	Jul-2020	Jul-2023	Jan-2024	0	0	Medigene	Germany	MDG-1021
NCT04483778	Solid Tumors	B7H3	Phase 1	Recruiting	Jul-2020	Dec-2025	Dec-2040	0	0	Seattle Children's Hospital	United States	B7H3 CAR T Cell Immunotherapy for Recurrent/Refractory Solid Tumors in Children and Young Adults
NCT04486872	DLBCL	CD19+CD20	Phase 1	Recruiting	Jul-2020	May-2022	Jun-2022	0	0	First Affiliated Hospital of Zhejiang University	China	An Exploratory Clinical Trial of Autologous Humanized Anti-cluster of Differentiation Antigen 19/20(CD19/CD20) Dual Specific CAR-T Cells Injection
NCT04499339	Multiple Myeloma	SLAMF7	Phase 1Phase 2	Recruiting	Jul-2020	Mar-2024	Mar-2024	0	0	Wuerzburg University Hospital|European Union	Germany	A Phase I/IIa Clinical Trial to Assess Feasibility, Safety and Antitumor Activity of Autologous SLAMF7 CAR-T Cells in Multiple Myeloma
NCT04499573	ALL	CD19+CD22	Phase 1Phase 2	Recruiting	Jul-2020	Dec-2022	Dec-2025	0	0	Federal Research Institute of Pediatric Hematology, Oncology and Immunology	Russian Federation	Bispecific CD19/CD22 CAR-T for Treatment of Children and Young Adults With r/r B-ALL
NCT04502446	T-Cell Lymphoma	CD70	Phase 1	Recruiting	Jul-2020	Mar-2027	May-2027	0	0	CRISPR Therapeutics	United States	CTX-130
NCT04511871	Gastric|Breast|Ovaria|Sarcoma	HER2	Phase 1	Recruiting	Jul-2020	Mar-2022	Jan-2023	0	0	Shanghai EXUMA Biotechnology	China	CCT303-406
NCT04693676	B-Cell Lymphoma	CD19+CD20	Phase 1	Recruiting	Jul-2020	Jul-2022	Oct-2022	0	0	First Affiliated Hospital of Zhejiang University	China	A Study of EXP039 Treatment in Subjects With r/r NHL Subjects
NCT04394650	Multiple Myeloma	BCMA	Phase 1	Recruiting	Aug-2020	Jan-2025	Jan-2025	0	0	Bristol-Myers Squibb|Celgene|Juno	United States	CC-98633
NCT04450069	B-Cell Lymphoma|DLBCL|Follicular Lymphoma|CLL|Marginal Zone Lymphoma|Mantle Cell Lymphoma|SLL|Follicular Lymphoma	CD19	Phase 1	Recruiting	Aug-2020	Jul-2023	Apr-2024	0	0	Calibr, a division of Scripps Research	United States	CLBR001 and SWI019 in Patients With Relapsed / Refractory B-cell Malignancies
NCT04506983	Liver	GPC3	Phase 1	Not yet recruiting	Aug-2020	Aug-2022	Nov-2022	0	0	China Immunotech Co.	China	GPC3 chimaeric antigen receptor therapy
NCT04508842	ALL	CD19 CD22	Phase 1	Not yet recruiting	Aug-2020	Aug-2022	Nov-2022	0	0	China Immunotech Co.	China	YT-19/22
NCT04513431	Colorectal	CEA	Early Phase 1	Not yet recruiting	Aug-2020	Mar-2021	Aug-2023	0	0	Ruijin Hospital|HuaDao (Shanghai) Biomedical Co., Ltd.	China	A Clinical Research of CAR T Cells Targeting CEA Positive Colorectal Cancer (CRC)
NCT04532268	B-Cell Lymphoma|ALL	CD19	Early Phase 1	Recruiting	Aug-2020	Aug-2023	Aug-2026	0	0	Zhejiang University|Yake Biotechnology Ltd.	China	A Study of Humanized CD19 CAR-T Cells Therapy for Patients With Relapsed and/or Refractory B-cell ALL and B-cell NHL
NCT04539444	B-Cell Lymphoma	CD19+CD22	Phase 2	Recruiting	Aug-2020	Feb-2022	Feb-2023	0	0	The First Affiliated Hospital of Soochow University|Shanghai Unicar-Therapy Bio-medicine Technology Co.,Ltd	China	A Study of CD19/22 CART Cells Combined With PD-1 Inhibitor in Relapsed/Refractory B-cell Lymphoma
NCT04555551	Multiple Myeloma	GPRC5D	Phase 1	Recruiting	Aug-2020	Aug-2022	Aug-2022	0	0	Bristol-Myers Squibb|Celgene|Juno	United States	ET-150
NCT04556669	Cervical|Sarcoma|NSCLC	CD22+PDL1	Phase 1	Recruiting	Aug-2020	Aug-2023	Aug-2025	0	0	Hebei Senlang Biotechnology	China	autologous anti-PD-L1 armoured CD22-targeting CAR-T cells
NCT04557436	ALL	CD19	Phase 1	Recruiting	Aug-2020	Jun-2022	Jun-2022	0	0	Great Ormond Street Hospital for Children NHS Foundation Trust|University College, London	United Kingdom	TT52CAR19 Therapy for B-cell Acute Lymphoblastic Leukaemia (B-ALL)
NCT04648475	B-Cell Lymphoma|ALL	CD19+CD22	Phase 1Phase 2	Recruiting	Aug-2020	Dec-2022	Jul-2023	0	0	Chongqing Precision Biotech Co., Ltd	China	Safety and Efficacy of CD19 and CD22 Targeted CAR-T Therapy for Relapsed/Refractory B Cell Leukemia and Lymphoma
NCT04655677	B-Cell Lymphoma	CD19+CD20	Phase 1	Recruiting	Aug-2020	Jul-2022	Oct-2022	0	0	Peking Union Medical College Hospital	China	A Study of EXP039 Treatment in Subjects With r/r NHL Subjects
NCT03938987	ALL	CD19	Phase 1Phase 2	Not yet recruiting	Sep-2020	Dec-2022	Dec-2024	0	0	University of Alberta	Canada	Anti-CD19, Dual Co-stimulatory (4-1BB, CD3Î¶) Chimeric Antigen Receptor T-cells in Patients With Relapsed/Refractory Aggressive Lymphoma or Acute Lymphoblastic Leukemia (ALL)
NCT04288726	NK/T-Cell Lymphoma	CD30	Phase 1	Recruiting	Sep-2020	Jun-2022	Jun-2037	0	0	Baylor College of Medicine|The Methodist Hospital System	United States	Allogeneic CD30.CAR-EBVSTs in Patients With Relapsed or Refractory CD30-Positive Lymphomas
NCT04420754	Thyroid	ICAM1	Phase 1	Recruiting	Sep-2020	Jun-2023	Jun-2024	0	0	AffyImmune Therapeutics	United States	AIC-100
NCT04467853	Gastric	CLD18	Phase 1	Recruiting	Sep-2020	Nov-2022	Nov-2024	0	0	Legend Biotech	China	LB-1904
NCT04503278	Solid Tumors	CLDN6	Phase 1Phase 2	Recruiting	Sep-2020	Sep-2022	Sep-2036	0	0	BioNTech	Germany	BNT-211
NCT04509726	Nasopharyngeal	IL12	Phase 1Phase 2	Not yet recruiting	Sep-2020	Aug-2021	Aug-2023	0	0	Beijing TCRCure Biological	China	LMBP2-specific TCR-T cell therapy
NCT04537442	Multiple Myeloma	BCMA	Phase 1	Recruiting	Sep-2020	Dec-2022	Mar-2023	0	0	Immunochina Pharmaceuticals	China	IM-21
NCT04538599	T/NK-Cell Lymphoma|T/NK-Cell Leukemia	CD7	Phase 1	Recruiting	Sep-2020	Sep-2021	Sep-2022	0	0	Zhejiang University	China	RD13-01 for Patients With r/r CD7+ T/NK Cell Hematologic Malignancies
NCT04545762	B-Cell Lymphoma	CD19	Phase 1	Recruiting	Sep-2020	Oct-2023	Oct-2023	0	0	University of California, Davis|University of California, San Francisco	United States	Anti-CD19 Chimeric Antigen Receptor T Cells for Treatment of Relapsed or Refractory Non-Hodgkin Lymphoma
NCT04546893	ALL	CD19	Phase 2	Recruiting	Sep-2020	Sep-2022	Dec-2022	0	0	Hebei Senlang Biotechnology	China	Senl_1904B
NCT04546906	ALL	CD22	Phase 1	Recruiting	Sep-2020	Sep-2022	Dec-2022	0	0	Hebei Senlang Biotechnology	China	CD22 chimaeric antigen receptor therapy
NCT04550663	Liver|Colorecta|Glioma	NKG2D	Phase 1	Not yet recruiting	Sep-2020	Sep-2022	Mar-2023	0	0	The Affiliated Nanjing Drum Tower Hospital of Nanjing University Medical School|KAEDI	China	NKG2D CAR-T(KD-025) in the Treatment of Relapsed or Refractory NKG2DL+ Tumors
NCT04553393	B-Cell Lymphoma	CD19 CD20	Phase 1Phase 2	Recruiting	Sep-2020	Sep-2021	Sep-2022	0	0	Chinese PLA General Hospital	China	Decitabine-primed Tandem CD19/CD20 CAR T Cells Plus Epigenetic Agents in Aggressive r/r B-NHL With Huge Tumor Burden
NCT04556266	All|CLL|B-Cell Lymphoma	CD19	Phase 1	Recruiting	Sep-2020	Sep-2023	Sep-2023	0	0	Memorial Sloan Kettering Cancer Center	United States	A Phase I Trial of Donor- Derived 19-28z CAR T Cells Following Allogeneic Transplant for the Treatment of CD19 Malignancies
NCT04561557	Neuromyelitis Optica	BCMA	Early Phase 1	Recruiting	Sep-2020	Dec-2022	Dec-2023	0	0	Tongji Hospital	China	CT103A
NCT04571138	Leukemia|Lymphoma	CD22	Phase 1Phase 2	Recruiting	Sep-2020	Apr-2023	Feb-2038	0	0	Seattle Children's Hospital	United States	A Pediatric and Young Adult Trial of Genetically Modified T Cells Directed Against CD22 for Relapsed/Refractory Leukemia or Lymphoma
NCT04577326	Mesothelioma	Mesothelin	Phase 1	Recruiting	Sep-2020	Sep-2022	Sep-2022	0	0	Memorial Sloan Kettering Cancer Center|Atara Biotherapeutics	United States	Mesothelin-targeted CAR T-cell Therapy in Patients With Mesothelioma
NCT04623944	AML|MDS	NKG2D	Phase 1	Recruiting	Sep-2020	Jul-2023	Jul-2038	0	0	Nkarta	United States	NKX-101
NCT04653649	T Cell Lymphoma	CD30	Phase 1Phase 2	Recruiting	Sep-2020	Dec-2023	Dec-2023	0	0	Fundació Institut de Recerca de l'Hospital de la Santa Creu i Sant Pau	Spain	CAR T-cells Against CD30 (HSP-CAR30) for Relapsed/ Refractory Hodgkin and T-cell Lymphoma.
NCT04691349	B-Cell Lymphoma|ALL	CD19	Early Phase 1	Recruiting	Sep-2020	Jan-2021	Sep-2021	0	0	PersonGen BioTherapeutics	China	chimaeric antigen receptor-T cell therapy
NCT04696432	B-Cell Lymphoma	CD19+CD20	Phase 1	Recruiting	Sep-2020	Jul-2022	Oct-2022	0	0	Tianjin Medical University Cancer Institute and Hospital	China	A Study of EXP039 Treatment in Subjects With r/r NHL Subjects
NCT04049383	ALL	CD19+CD20	Phase 1	Recruiting	Oct-2020	Oct-2022	Feb-2023	0	0	Medical College of Wisconsin|Children's Hospital and Health System Foundation, Wisconsin	United States	CAR-20/19-T Cells in Pediatric Patients With Relapsed/Refractory B Cell ALL
NCT04225676	ALL	CD19	Phase 2	Recruiting	Oct-2020	Feb-2022	Oct-2022	0	0	Novartis	United States	tisagenlecleucel-t
NCT04404595	Gastric|Pancreatic	CLD18	Phase 1	Recruiting	Oct-2020	Jun-2022	Sep-2035	0	0	CARsgen Therapeutics	China	CT-041
NCT04520711	Epithelial	CD40	Phase 1	Not yet recruiting	2020-10-01	2022-12-01	2024-12-01	0	0	Providence Health & Services	United States	Study of Adoptively Transferred, Gene-engineered T Cells With CD40 Activation and PD-1 Blockade in Incurable Cancers
NCT04562298	Ovarian	Mesothelin	Phase 1	Recruiting	Oct-2020	Nov-2022	Nov-2024	0	0	Legend Biotech	China	LCAR-M23 CAR-T-cell therapy
NCT04572308	T-Cell Leukemia	CD7	Phase 1	Recruiting	Oct-2020	Oct-2022	Dec-2022	0	0	Hebei Senlang Biotechnology	China	CD7 chimaeric antigen receptor therapy
NCT04581473	Gastric|Pancreatic|Gastroesophageal Junction	CLD18	Phase 1Phase 2	Recruiting	Oct-2020	Sep-2022	Dec-2022	0	0	CARsgen Therapeutics	China	CT-041
NCT04586478	B-Cell Lymphoma	CD19	Phase 2	Recruiting	Oct-2020	Jun-2021	Mar-2023	0	0	Juventas Cell Therapy	China	HY-001
NCT04599556	Leukemia|Lymphoma	CD7	Phase 1Phase 2	Recruiting	Oct-2020	Dec-2022	Dec-2023	0	0	Yake Biotechnology	China	CD7 CAR-T therapy
NCT04601181	All|CLL|B-Cell Lymphoma	CD22	Phase 1	Recruiting	Oct-2020	Oct-2022	Oct-2023	0	0	Fundamenta Therapeutics	China	ThisCART19 cell therapy
NCT04601935	Multiple Myeloma	BCMA	Phase 1	Recruiting	Oct-2020	Jan-2023	Oct-2024	0	0	Nanjing Legend Biotech Co.|Shanghai Changzheng Hospital	China	A Single-center Exploratory Clinical Study to Evaluate the Safety, Tolerability, and Efficacy of a BCMA-targeted Universal LCAR-BCX Cells in Patients With Relapsed/Refractory Multiple Myeloma
NCT04652219	Gastric	GUCY2C	Early Phase 1	Recruiting	Oct-2020	Oct-2021	Oct-2023	0	0	Innovative Cellular Therapeutics	China	gucy2c chimaeric antigen receptor-T cell therapy
NCT04665063	HL	BCMA+CD19+CD22+CD79	Phase 1	Recruiting	Oct-2020	Oct-2023	Oct-2025	0	0	Hebei Senlang Biotechnology Inc., Ltd.|Hebei Medical University Fourth Hospital	China	A Multicenter Clinical Study on the Safety and Effectiveness of CAR-T in the Treatment of Relapsed/Refractory Hodgkin's Lymphoma
NCT04665076	MDS	BCMA+CD19+CD22+CD79	Phase 1	Recruiting	Oct-2020	Oct-2023	Oct-2025	0	0	Hebei Senlang Biotechnology Inc., Ltd.|Hebei Medical University Fourth Hospital	China	Multicenter Clinical Study on the Safety and Effectiveness of CAR-T in the Treatment of Relapsed/Refractory Plasma Cell Tumors
NCT04666168	B-Cell Lymphoma	CD19+CD22+CD30+CD7+CD79	Phase 1	Recruiting	Oct-2020	Oct-2023	Oct-2025	0	0	Hebei Senlang Biotechnology Inc., Ltd.|Hebei Medical University Fourth Hospital	China	A Multicenter Clinical Study on the Safety and Efficacy of CAR-T in the Treatment of Relapsed / Refractory Non Hodgkin's Lymphoma
NCT04723901	ALL	CD19+CD22	Phase 1Phase 2	Recruiting	Oct-2020	Dec-2022	Dec-2022	0	0	Shenzhen University General Hospital	China	Dual Target CAR-T Cells in B-cell Acute Lymphoblastic Leukemia
NCT04723914	B-Cell Lymphoma	CD19+CD20	Phase 1Phase 2	Recruiting	Oct-2020	Dec-2022	Dec-2022	0	0	Shenzhen University General Hospital	China	Dual Target CAR-T Cells in B-cell Lymphoma
NCT04729543	Melanoma|Head and Neck	MAGE-C2	Phase 1Phase 2	Recruiting	Oct-2020	Oct-2022	Oct-2027	0	0	Erasmus Medical Center|Ludwig Institute for Cancer Research|Dutch Cancer Society|Stichting Coolsingel Rotterdam grant|Jan Ivo Stichting grant	Netherlands	MAGE-C2 TCR T Cell Trial to Treat Melanoma and Head and Neck Cancer
NCT04029038	B-Cell Lymphoma|ALL|CLL	CD19 CD22	Phase 1Phase 2	Not yet recruiting	Nov-2020	Aug-2022	Aug-2023	0	0	M.D. Anderson Cancer Center|National Cancer Institute (NCI)	United States	Modified Immune Cells (CD19-CD22 CAR T Cells) in Treating Patients With Recurrent or Refractory CD19 Positive, CD22 Positive Leukemia or Lymphoma
NCT04223765	Mantle Cell Lymphoma|Follicular Lymphoma|Marginal Zone Lymphoma	Kappa+CD28	Phase 1	Recruiting	Nov-2020	Dec-2023	Dec-2038	0	0	UNC Lineberger Comprehensive Cancer Center	United States	Study of Kappa Chimeric Antigen Receptor (CAR) T Lymphocytes Co-Expressing the Kappa and CD28 CARs for Relapsed/Refractory Kappa+ Non-Hodgkin Lymphoma
NCT04419909	B-Cell Lymphoma	CD19	Phase 1	Not yet recruiting	Nov-2020	Jul-2027	Jul-2027	0	0	University of Pennsylvania	United States	Retreatment With CTL019/CTL119
NCT04480788	NK-T-cell Lymphoma|T-cell Lymphoma	CD7	Phase 1	Recruiting	Nov-2020	Aug-2022	Aug-2022	0	0	PersonGen BioTherapeutics (Suzhou) Co., Ltd.|The First Affiliated Hospital of Zhengzhou University	China	CD7-CART in the Treatment of r / r CD7 Positive Hemolymph System Malignancies on Increasing Dose and Open Label Study
NCT04516551	ALL|CLL|B-Cell Lymphoma	CD19	Phase 1	Recruiting	Nov-2020	Dec-2021	Dec-2022	0	0	Xinqiao Hospital of Chongqing|Gracell Biotechnologies (Shanghai) Co., Ltd|First Affiliated Hospital of Zhejiang University|The Second Affiliated Hospital of Chongqing Medical University|The Affiliated Hospital Of Guizhou Medical University|The General Hospital of Western Theater Command|Chongqing University Cancer Hospital|The First Affiliated Hospital of Anhui Medical University|Tang-Du Hospital…	China	Anti-CD19 Allo-CAR-T Cells for Relapsed B Cell Malignancies After HSCT
NCT04526834	T-Cell Lymphoma|NK/T-Cell Lymphoma|DLBCL	CD30	Phase 1	Recruiting	Nov-2020	Feb-2022	Feb-2023	0	0	Tessa Therapeutics	Singapore	TT-11
NCT04532203	B-Cell Lymphoma|ALL	CD19	Early Phase 1	Recruiting	Nov-2020	Nov-2023	Nov-2026	0	0	Zhejiang University	China	A Study of CAR-T Cells Therapy for Patients With Relapsed and/or Refractory Central Nervous System Hematological Malignancies
NCT04532281	ALL	CD19	Early Phase 1	Recruiting	Nov-2020	Nov-2023	Nov-2026	0	0	Zhejiang University|Yake Biotechnology Ltd.	China	A Study of Murine CD19 CAR-T Therapy for Patients With Relapsed or Refractory CD19+ B-cell Hematological Malignancies
NCT04594135	T-Cell Leukemia|T-Cell Lymphoma	CD5	Phase 1	Not yet recruiting	Nov-2020	Nov-2022	Nov-2022	0	0	iCell Gene Therapeutics	United States	anti-CD5 CAR-T therapy
NCT04599543	AML	IL3 CD123	Early Phase 1	Not yet recruiting	Nov-2020	Nov-2023	Nov-2026	0	0	Yake Biotechnology	China	CD123 CAR-T therapy
NCT04603872	Multiple Myeloma|ALL|B-Cell Lymphoma	CD19+BCMA	Early Phase 1	Recruiting	Nov-2020	Nov-2023	Nov-2026	0	0	Yake Biotechnology	China	CD19/BCMA targeted chimaeric antigen receptor T-cell therapy
NCT04609241	B-Cell Lymphoma|ALL	CD79b	Early Phase 1	Not yet recruiting	Nov-2020	Nov-2023	Nov-2026	0	0	Yake Biotechnology	China	CD79b chimaeric antigen receptor-T cell therapy
NCT04613557	Multiple Myeloma	BCMA	Phase 1	Recruiting	Nov-2020	Feb-2023	Feb-2036	0	0	Celyad Oncology	Belgium	CYAD-211
NCT04620655	T-Cell Leukemia|T-Cell Lymphoma	CD7	Phase 1	Recruiting	Nov-2020	Nov-2021	Nov-2022	0	0	Hebei Yanda Ludaopei Hospital	China	RD13-01 for Patients With r/r CD7+ T-ALL/T-LBL
NCT04626908	B-Cell Lymphoma	CD19 CD22	Phase 1Phase 2	Not yet recruiting	Nov-2020	Jun-2022	Jun-2023	0	0	Gracell Biotechnology Ltd.|Zhejiang University	China	Clinical Study of Targeting CD19 and CD22 Chimeric Antigen Receptor T Lymphocytes in the Treatment of Recurrent or Refractory B Cell Non-Hodgkin Lymphoma
NCT04633148	Renal|Prostate|NSCLC|Breast|Colorectal	PSMA	Phase 1	Recruiting	Nov-2020	Nov-2022	May-2023	0	0	Cellex Patient Treatment	Germany	UniCAR-T-PSMA
NCT04637269	Multiple Myeloma	BCMA	Early Phase 1	Recruiting	Nov-2020	Nov-2021	Nov-2023	0	0	Xinqiao Hospital of Chongqing|Carbiogene Therapeutics Co. Ltd.	China	Anti-BCMA CAR-T Cell Therapy for the R/R Multiple Myeloma
NCT04637503	Neuroblastoma	B7H3	Phase 1Phase 2	Recruiting	Nov-2020	Nov-2020	Dec-2023	0	0	Shenzhen Geno-Immune Medical Institute|Shenzhen Children's Hospital	China	4SCAR-T Therapy Targeting GD2, PSMA and CD276 for Treating Neuroblastoma
NCT04638270	B-Cell Lymphoma	CD19	Early Phase 1	Not yet recruiting	Nov-2020	Nov-2021	Nov-2023	0	0	Xinqiao Hospital of Chongqing|Gracell Biotechnologies (Shanghai) Co., Ltd|920th Hospital of Joint Logistics Support Force|The Second Affiliated Hospital of Chongqing Medical University|The Affiliated Hospital Of Guizhou Medical University|The Second Affiliated Hospital of Kunming Medical University|Chongqing University Cancer Hospital	China	Anti-CD19 FasT CAR-T Cell Therapy for B Cell NHL
NCT03740256	Bladder Head and Neck Salivary Gland Lung Breast Gastric Esophageal Colorectal Pancreatic	HER2	Phase 1	Recruiting	Dec-2020	Dec-2024	Dec-2038	0	0	Baylor College of Medicine	United States	Binary Oncolytic Adenovirus in Combination With HER2-Specific CAR VST, Advanced HER2 Positive Solid Tumors (VISTA)
NCT04176913	DLBCL|Follicular Lymphoma|Mantle Cell Lymphoma|SLL	CD20	Phase 1	Recruiting	Dec-2020	Oct-2022	Jan-2023	0	0	The First Affiliated Hospital with Nanjing Medical University	China	Study of LUCAR-20S in Patients With R/R NHL
NCT04257578	B-Cell Lymphoma	CD19	Phase 1Phase 2	Recruiting	Dec-2020	Mar-2024	Mar-2029	0	0	University of Washington|National Cancer Institute (NCI)|AstraZeneca	United States	Acalabrutinib and Anti-CD19 CAR T-cell Therapy for the Treatment of B-cell Lymphoma
NCT04484012	Mantle Cell Lymphoma	CD19	Phase 2	Recruiting	Dec-2020	Sep-2023	Sep-2023	0	0	City of Hope Medical Center|National Cancer Institute (NCI)	United States	Modified Immune Cells (CD19 CAR T Cells) and Acalabrutinib for the Treatment of Relapsed or Refractory Mantle Cell Lymphoma
NCT04510051	Brain	IL13Ra2	Phase 1	Recruiting	Dec-2020	Sep-2023	Sep-2023	0	0	City of Hope Medical Center|National Cancer Institute (NCI)	United States	CAR T Cells After Lymphodepletion for the Treatment of IL13RÎ±2 Positive Recurrent or Refractory Brain Tumors in Children
NCT04526509	Neoplasms	NY-ESO-1+LAGE-1a	Phase 1	Recruiting	Dec-2020	Feb-2024	Feb-2024	0	0	GlaxoSmithKline	United Kingdom	GSK-3845097|GSK3901961
NCT04541368	Multiple Myeloma	CS1	Early Phase 1	Not yet recruiting	Dec-2020	Dec-2023	Dec-2026	0	0	Yake Biotechnology	China	CS1-chimaeric antigen receptor-T cell therapy
NCT04544592	B-Cell Lymphoma|ALL	CD19	Phase 1Phase 2	Not yet recruiting	Dec-2020	Jun-2021	Jul-2021	0	0	University of Colorado, Denver|National Cancer Institute (NCI)	United States	UCD19 CarT in Treatment of Pediatric B-ALL and B-NHL
NCT04617704	Multiple Myeloma	CD19 BCMA	Early Phase 1	Not yet recruiting	Dec-2020	Dec-2021	Feb-2022	0	0	Shanghai Changzheng Hospital|Gracell Biotechnologies (Shanghai) Co., Ltd	China	BCMA and CD19 Targeted Fast Dual CART for Chromosomal Abnomalities High-risk BCMA+ Multiple Myeloma
NCT04627740	Ovarian|Endometrial	AFPP	Phase 1Phase 2	Not yet recruiting	Dec-2020	Dec-2022	Dec-2023	0	0	Beijing TCRCure Biological	China	anti-ALPP CAR-T therapy
NCT04629729	All|CLL|B-Cell Lymphoma	CD19	Phase 1	Not yet recruiting	Dec-2020	Dec-2022	Dec-2037	0	0	Fate Therapeutics	United States	FT-819
NCT04637763	B-Cell Lymphoma	CD19	Phase 1	Recruiting	Dec-2020	Aug-2025	Sep-2025	0	0	Caribou Biosciences	United States	CB-010
NCT04639739	B-Cell Lymphoma	CD19	Early Phase 1	Not yet recruiting	2020-12-01	2021-12-01	2023-12-01	0	0	Xinqiao Hospital of Chongqing|Chongqing Precision Biotech Co., Ltd	China	Anti-CD19 CAR NK Cell Therapy for R/R Non-Hodgkin Lymphoma.
NCT04650451	Gastric|Breast	HER2	Phase 1	Recruiting	Dec-2020	Dec-2023	Jan-2025	0	0	Bellicum Pharmaceuticals	United States	BPX-603
NCT04661020	B-Cell Lymphoma	CD119	Early Phase 1	Not yet recruiting	Dec-2020	Dec-2023	Dec-2026	0	0	Zhejiang University|Yake Biotechnology Ltd.	China	CD19 CAR-T Therapy for Elderly Patients With B-cell Non-Hodgkin's Lymphoma
NCT04662099	Multiple Myeloma	BCMA CS1	Phase 1	Not yet recruiting	Dec-2020	Dec-2022	Dec-2023	0	0	Wuhan Si'an Medical Technology	China	bispecific chimaeric antigen receptor -T cells therapy
NCT04670068	Ovarian	B7H3	Phase 1	Not yet recruiting	Dec-2020	Feb-2025	Feb-2030	0	0	UNC Lineberger Comprehensive Cancer Center|National Institutes of Health (NIH)	United States	Phase I Study of Autologous CAR T-Cells Targeting the B7-H3 Antigen in Recurrent Epithelial Ovarian
NCT04677452	Multiple Myeloma	BCMA	Phase 1	Recruiting	Dec-2020	Mar-2022	Dec-2024	0	0	The First Affiliated Hospital of Soochow University	China	Dose Exploration Study OF JWCAR129, BCMA-Targeted CART for RRMM
NCT04684147	ALL	CD19	Phase 2	Recruiting	Dec-2020	Dec-2021	Mar-2024	0	0	Juventas Cell Therapy	China	HY-001
NCT04689204	B-Cell Lymphoma ALL	CD19	Early Phase 1	Recruiting	Dec-2020	Dec-2022	May-2027	0	0	Nanjing Bioheng Biotech	China	CTA-30X
NCT04697940	B-Cell Lymphoma	CD19+CD20	Phase 1Phase 2	Recruiting	Dec-2020	Dec-2021	Dec-2025	0	0	Chinese PLA General Hospital	China	Decitabine-primed Tandem CD19/CD20 CAR T Cells Treatment in r/r B-NHL
